# Supplementary material for: The need to change the approach to the safe use of herbicides by developing chiral and environmentally friendly formulations: a series of enantioselective (R)- and (S)-phenylethylammonium chloroacetates
Source: Royal Society of Chemistry journal article supplement (doi:10.1039/d1gc03970a), 2022-01-01
Supplement: d1gc03970a1.pdf [file d1gc03970a1.pdf]

## Supplementary material

### The need to change the approach to the safe use of herbicides by developing chiral and environmentally friendly formulations: a series of enantioselective (R)- and (S)-phenylethylammonium chloroacetates

Marika Turek<sup>a</sup>, Robert Biczak<sup>a</sup>, Barbara Pawłowska<sup>a</sup>, Ewa Różycka-Sokołowska<sup>a</sup>, Krzysztof Owsianik<sup>b</sup>, Bernard Marciniak<sup>a</sup>, Piotr Bałczewski<sup>\*a,b</sup>

<sup>a</sup> Institute of Chemistry, Faculty of Science and Technology, Jan Długosz University in Częstochowa, Armii Krajowej 13/15, Częstochowa, 42-200, Poland; <sup>b</sup> Division of Organic Chemistry, Centre of Molecular and Macromolecular Studies, Polish Academy of Sciences, Sienkiewicza 112, Łódź, 90-363, Poland.

\* Corresponding author at: Division of Organic Chemistry, Centre of Molecular and Macromolecular Studies, Polish Academy of Sciences, Box: 90-363, Łódź, Poland; Tel/Fax: +48-42-6803-216, +48-42-684-71-26. E-mail address: [pbalczew@cbmm.lodz.pl](mailto:pbalczew@cbmm.lodz.pl) (P. Bałczewski)

### Table of contents

|                                                                                                 |           |
|-------------------------------------------------------------------------------------------------|-----------|
| 1. Synthesis of QASs                                                                            | S2 – S11  |
| 2. X-ray crystal structure determination of diisopropylammonium sulfate (DIPA-SO <sub>4</sub> ) | S12       |
| 3. Phytotoxicity studies                                                                        | S13 – S24 |
| 4. Herbicidal activity                                                                          | S24 – S43 |

## 1. Synthesis of QASs

**General:** (*R*)-(+)- and (*S*)-(-)-1-phenylethylammonium chloro-, dichloro- and trichloroacetates were synthesized in the reaction of the corresponding chloro-, dichloro- and trichloroacetic acids with 10% excess of (*R*)-(+)- or (*S*)-(-)-1-phenylethylamine without solvent. In case of chloroacetates, the reactions were performed at room temperature, whereas in case of di- and trichloroacetates, the reactions were carried out in flasks immersed in a cooling ice-water bath. After the reaction was completed, the excess of amine was evaporated with a rotary vacuum evaporator. (*R*)-(+)- and (*S*)-(-)-1-Phenylethylammonium sulfates [(*R*)-SO<sub>4</sub>, (*S*)-SO<sub>4</sub>] were synthesized in the reaction of H<sub>2</sub>SO<sub>4</sub> (aq. 25%) with (*R*)-(+)- or (*S*)-(-)-1-phenylethylamine in a 1:2 molar ratio without solvent.<sup>1</sup> The reactions were carried out at low temperature using a cooling ice-water bath, collected solids were dried and subjected to further analysis. Diisopropylammonium sulfate (i-Pr<sub>2</sub>NH<sup>+</sup>)<sub>2</sub>SO<sub>4</sub> (DIPA-SO<sub>4</sub>) was prepared in the reaction performed in chloroform according to the procedure used in the literature for tris(diisopropylammonium) sulfate-hydrogensulfate [(i-Pr<sub>2</sub>NH<sup>+</sup>)<sub>3</sub>(SO<sub>4</sub><sup>2-</sup>)(HSO<sub>4</sub><sup>-</sup>)] except that the amine and concentrated (95 %) sulfuric acid were used in a 2:1 molar ratio instead of 3:2 as in the original procedure.<sup>2</sup> A small amount of the sulfate-hydrogensulfate was detected in the crude reaction mixture (MS: m/z = 500.3039). Crystallization of the crude diisopropylammonium sulfate (DIPA-SO<sub>4</sub>) was carried out in methanol instead of water<sup>2</sup> to avoid hydrolysis of the product to the sulfate-hydrogensulfate. The structure of DIPA-SO<sub>4</sub> was clearly confirmed by X-ray analysis (see below). Similar protocol for the DIPA-SO<sub>4</sub> synthesis, however, without use of any solvent, was performed by Reiß and Engel.<sup>3</sup>

Optical rotation values were measured in 100 mm cell on Perkin Elmer 241 MC under Na lamp radiation in MeOH. The <sup>1</sup>H NMR and <sup>13</sup>C NMR spectra were recorded on a Bruker AV 200, AV 500 spectrometers in CDCl<sub>3</sub>, MeOD or D<sub>2</sub>O with chemical shifts (δ) given in ppm relative to TMS as an internal standard. The low resolution FAB(+) and FAB(-) mass spectra (LSI, Cs<sup>+</sup>, 13 keV) of pure compounds were obtained using a Finnigan Mat 95 spectrometer. High-resolution mass spectrometry (HRMS) measurements were performed using Finnigan Mat 95 and Synapt G2-Si mass spectrometer (Waters) equipped with an ESI source and quadrupole-Time-of-Flight mass analyser. The mass spectrometer was operated in the positive and negative ion detection modes. The measurement was performed with capillary voltage set to 2.7 kV and sampling cone to 20 V. The source temperature was 110 °C. The results of the measurements were processed using the MassLynx 4.1 software (Waters) incorporated with the instrument. Melting points were measured using Boetius apparatus. Elemental analysis was determined with an EuroVector analyzer model 301.

<sup>1</sup> J. Cihelka, D. Havlíček, R. Gyepes, I. Němec, Z. Koleva, S-(-)-1-phenyl ethyl ammonium(1+) sulphate and S-(-)-1-phenyl ethyl ammonium(1+) hydrogen phosphate 2.5 hydrate, preparation and characterization of crystallographic, optical and dielectric properties, *J. Mol. Struct.*, 2010, 980 (1-3), 31-38. DOI: 10.1016/j.molstruc.2010.06.033

<sup>2</sup> G. Sh. Mohammadnezhad, M. M. Amini, H. R. Khavasi, S. W. Ng, Tris(diiso-propyl-ammonium) hydrogensulfate sulfate, *Acta Cryst E*, 2008, 64 (8), 1564. DOI: 10.1107/S160053680802237X

<sup>3</sup> G. J. Reiß, J. S. Engel, Bis(diisopropylammonium) sulfate, *Acta Cryst E*, 2004, 60 (6), 985-987. DOI: 10.1107/S1600536804010645

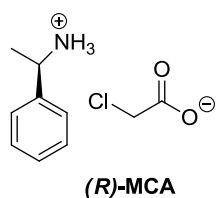

**(R)-(+)-1-Phenylethylammonium chloroacetate ((R)-MCA)** m.p. 78-80 °C;  $[\alpha]_{25}^D = +6.9$  (1, MeOH);  $^1\text{H}$  NMR (200 MHz,  $\text{CDCl}_3$ )  $\delta$  (ppm) = 1.55 (d, 3H,  $J = 6.0$  Hz,  $\text{CH}_3$ ), 3.57 (d, 2H,  $J = 2.0$  Hz,  $\text{CH}_2\text{Cl}$ ), 4.24 (q, 1H,  $J = 8.0$  Hz, CH), 7.29-7.41 (m, 5H,  $\text{C}_6\text{H}_5$ ), 8.04 (br s, 3H,  $\text{NH}_3^+$ );  $^{13}\text{C}$  NMR (126 MHz,  $\text{CDCl}_3$ )  $\delta$  (ppm) = 21.08 (s,  $\text{CH}_3$ ), 44.30 (s,  $\text{CH}_2$ ), 51.18 (s, CH), 126.62 (s, 2 x  $\text{C}_{\text{Ar}}$ ), 128.67 (s,  $\text{C}_{\text{Ar}}$ ), 129.00 (s, 2 x  $\text{C}_{\text{Ar}}$ ), 138.86 (s,  $\text{C}_{\text{Ar}}$ ), 173.20 (s,  $\text{COO}^-$ ); HRMS [TOF ES $^-$ ] for  $\text{ClCH}_2\text{COO}^-$ , Calcd for  $\text{C}_2\text{H}_2\text{ClO}_2$ : 92.9743, Found: 92.9743; MS-FAB( $^-$ ):  $m/z$  (%) = 93, 95 ( $\text{ClCH}_2\text{COO}^-$ ,  $^{35}\text{Cl}/^{37}\text{Cl}$ , 30, 10); HRMS [TOF ES $^+$ ] for  $\text{C}_6\text{H}_5\text{CH}(\text{CH}_3)\text{NH}_3^+$ , Calcd for  $\text{C}_8\text{H}_{12}\text{N}$ : 122.0970, Found: 122.0969; MS-FAB ( $^+$ ):  $m/z$  (%) = 122 [ $\text{C}_6\text{H}_5\text{CH}(\text{CH}_3)\text{NH}_3^+$ , 100]; Anal. Calcd for  $\text{C}_{10}\text{H}_{14}\text{ClNO}_2$ : C, 55.69; H, 6.54; N, 6.49; Cl, 16.44 Found: C, 55.72; H, 6.60; N, 6.51; Cl, 16.21.

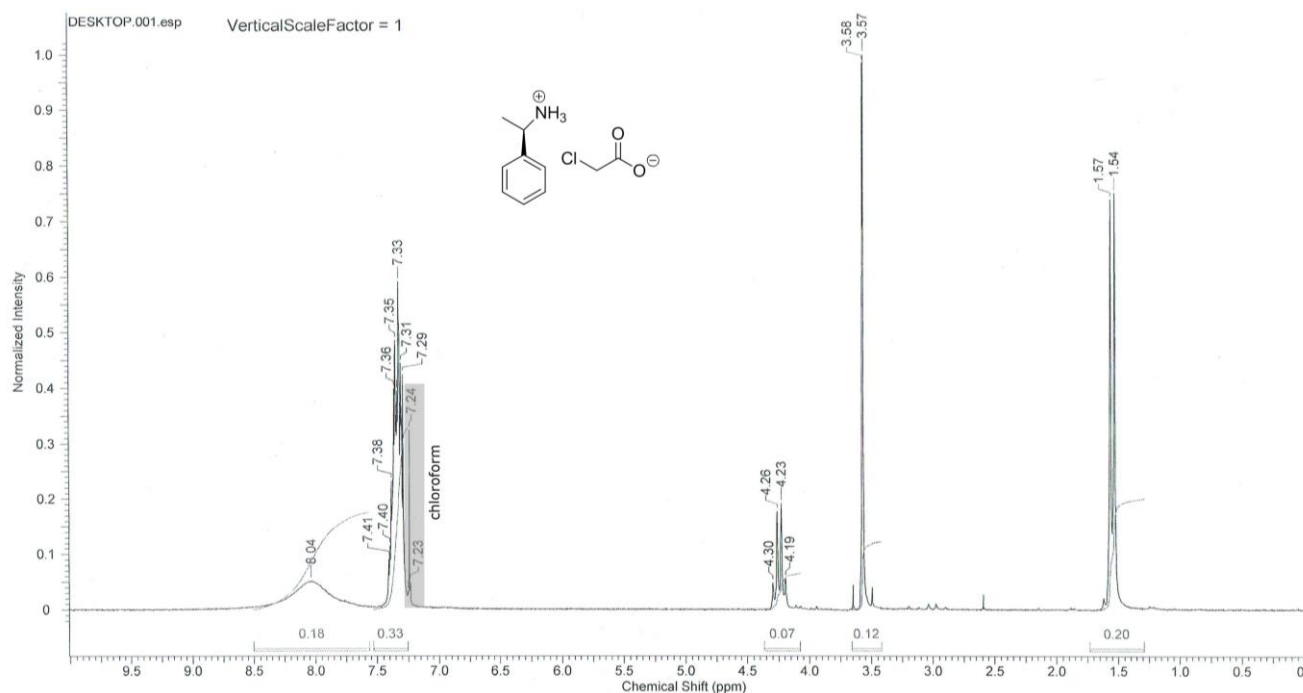

Figure S1  $^1\text{H}$  NMR spectrum of (R)-MCA.

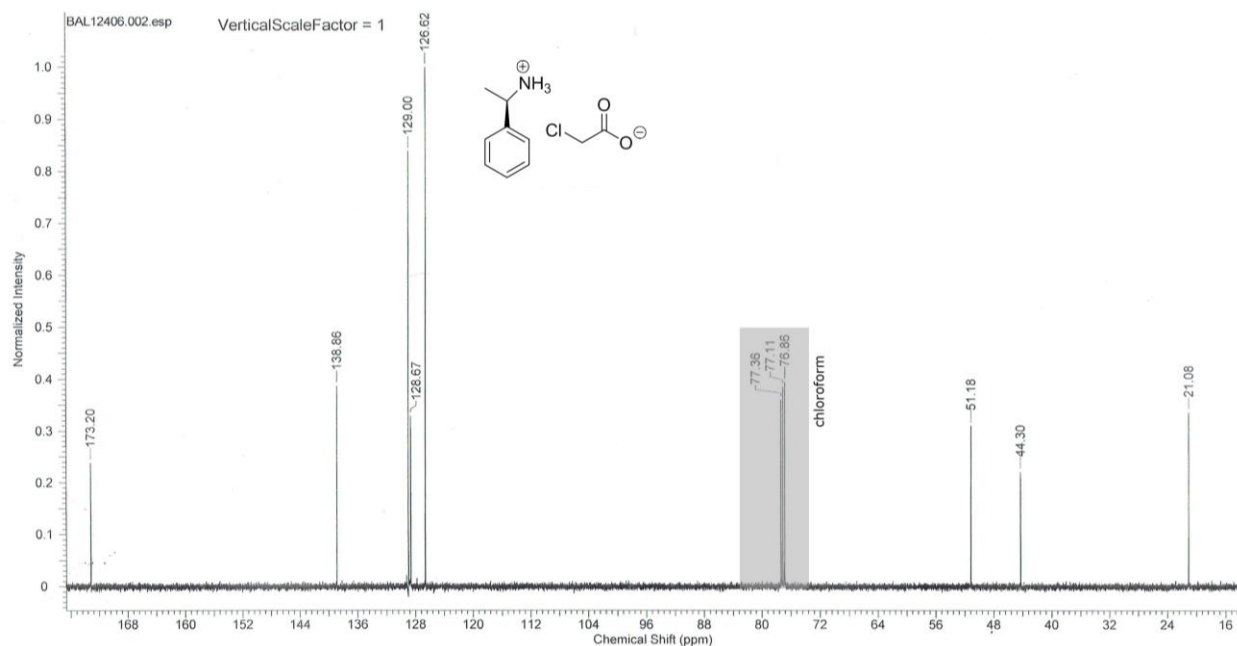

Figure S2  $^{13}\text{C}$  NMR spectrum of (R)-MCA.

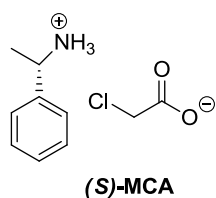

**(S)-(-)-1-Phenylethylammonium chloroacetate ((S)-MCA)** oil; ;  $[\alpha]_{25}^D = -6.6$  (1.7, MeOH);  $^1\text{H}$  NMR (200 MHz,  $\text{CDCl}_3$ )  $\delta$  (ppm) = 1.55 (d, 3H,  $J = 6.0$  Hz,  $\text{CH}_3$ ), 3.57 (s, 2H,  $\text{CH}_2\text{Cl}$ ), 4.24 (q, 1H,  $J = 8.0$  Hz, CH), 7.25-7.41 (m, 5H,  $\text{C}_6\text{H}_5$ ), 7.76 (br s, 3H,  $\text{NH}_3^+$ );  $^{13}\text{C}$  NMR (126 MHz,  $\text{CDCl}_3$ )  $\delta$  (ppm) = 21.07 (s,  $\text{CH}_3$ ), 44.31 (s,  $\text{CH}_2$ ), 51.18 (s, CH), 126.65 (s, 2 x  $\text{C}_{\text{Ar}}$ ), 128.67 (s,  $\text{C}_{\text{Ar}}$ ), 129.00 (s, 2 x  $\text{C}_{\text{Ar}}$ ), 138.86 (s,  $\text{C}_{\text{Ar}}$ ), 173.19 (s,  $\text{COO}^-$ ); MS-FAB (-):  $m/z$  (%) = 93, 95 ( $\text{ClCH}_2\text{COO}^-$ ,  $^{35}\text{Cl}/^{37}\text{Cl}$ , 20, 7); MS-FAB (+):  $m/z$  (%) = 122 [ $\text{C}_6\text{H}_5\text{CH}(\text{CH}_3)\text{NH}_3^+$ , 100]; Anal. Calcd for  $\text{C}_{10}\text{H}_{14}\text{ClNO}_2$ : C, 55.69; H, 6.54; N, 6.49; Cl, 16.44 Found: C, 55.77; H, 6.62; N, 6.54; Cl, 16.20.

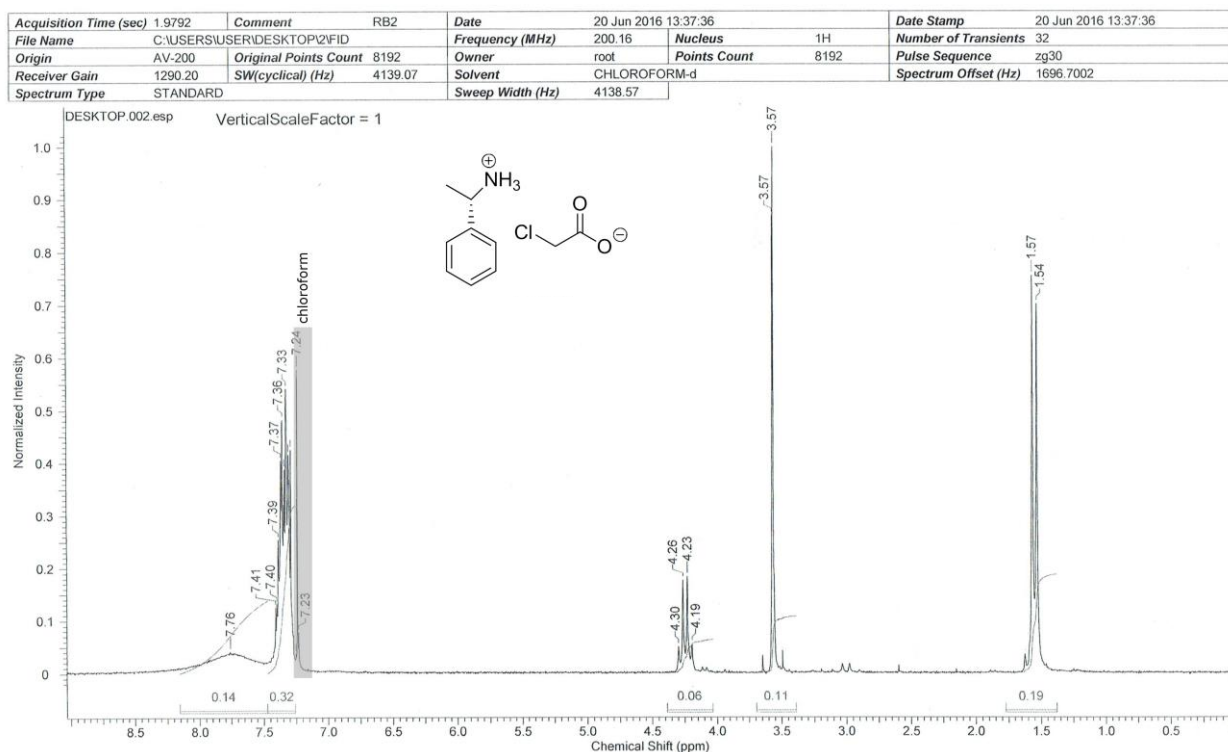

Figure S3  $^1\text{H}$  NMR spectrum of (S)-MCA.

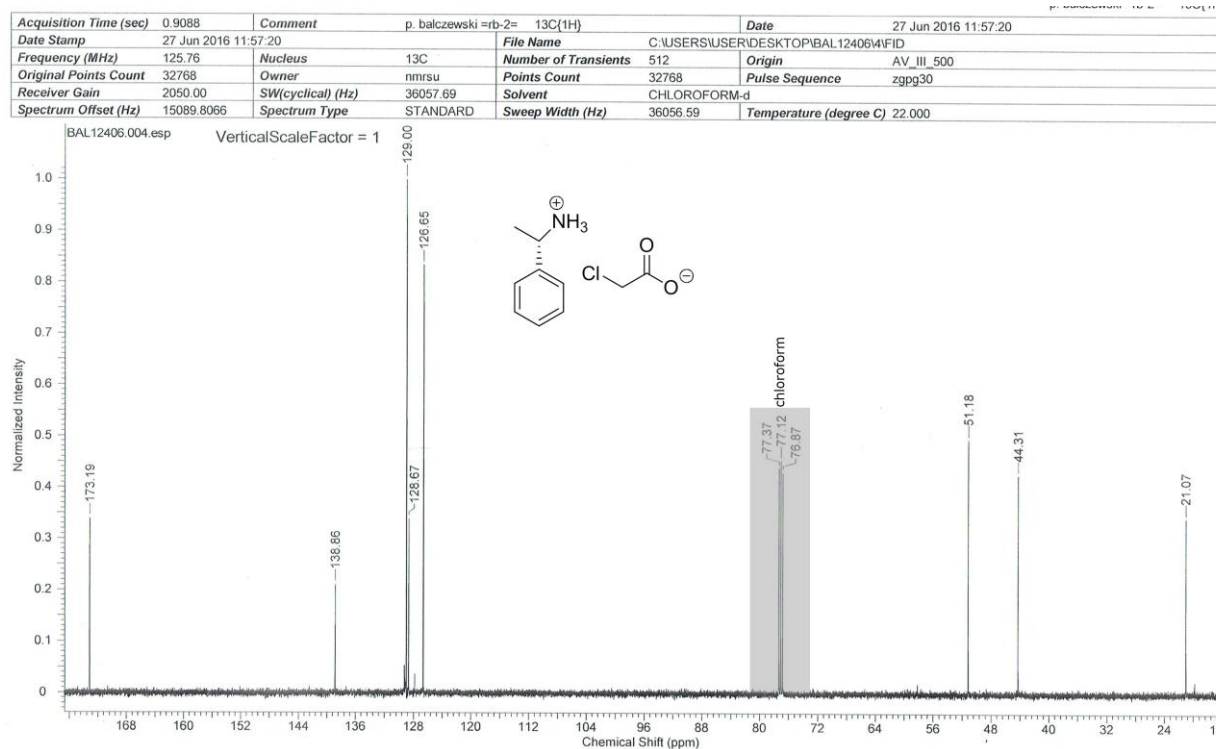

Figure S4  $^{13}\text{C}$  NMR spectrum of (S)-MCA.

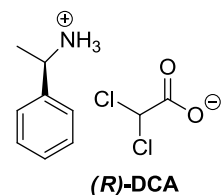

**(R)-(+)-1-Phenylethylammonium dichloroacetate ((R)-DCA)** m.p. 105-106 °C; ;  $[\alpha]_{25}^D = +3.3$  (1, MeOH);  $^1\text{H}$  NMR (200 MHz,  $\text{CDCl}_3$ )  $\delta$  (ppm) = 1.54 (d, 3H,  $J = 6.0$  Hz,  $\text{CH}_3$ ), 4.24 (q, 1H,  $J = 6.0$  Hz, CH), 5.48 (s, 1H,  $\text{Cl}_2\text{CH}$ ), 7.25-7.37 (m, 5H,  $\text{C}_6\text{H}_5$ );  $^{13}\text{C}$  NMR (126 MHz,  $\text{D}_2\text{O}$ )  $\delta$  (ppm) = 19.57 (s,  $\text{CH}_3$ ), 50.89 (s, CH), 68.40 (s,  $\text{Cl}_2\text{CH}$ ), 126.40 (s, 2 x  $\text{C}_{\text{Ar}}$ ), 128.97 (s,  $\text{C}_{\text{Ar}}$ ), 129.17 (s,  $\text{C}_{\text{Ar}}$ ), 129.39 (s,  $\text{C}_{\text{Ar}}$ ), 138.26 (s,  $\text{C}_{\text{Ar}}$ ), 170.78 (s,  $\text{COO}^-$ ); MS-FAB (-):  $m/z$  (%) = 93, 95 ( $\text{ClCH}_2\text{COO}^-$ ,  $^{35}\text{Cl}/^{37}\text{Cl}$ , 20, 7); MS-FAB (+):  $m/z$  (%) = 122 [ $\text{C}_6\text{H}_5\text{CH}(\text{CH}_3)\text{NH}_3^+$ , 100]; Anal. Calcd for  $\text{C}_{10}\text{H}_{13}\text{Cl}_2\text{NO}_2$ : C, 48.02; H, 5.24; N, 5.60; Cl, 28.35 Found: C, 47.91; H, 5.47; N, 5.42; Cl, 28.34.

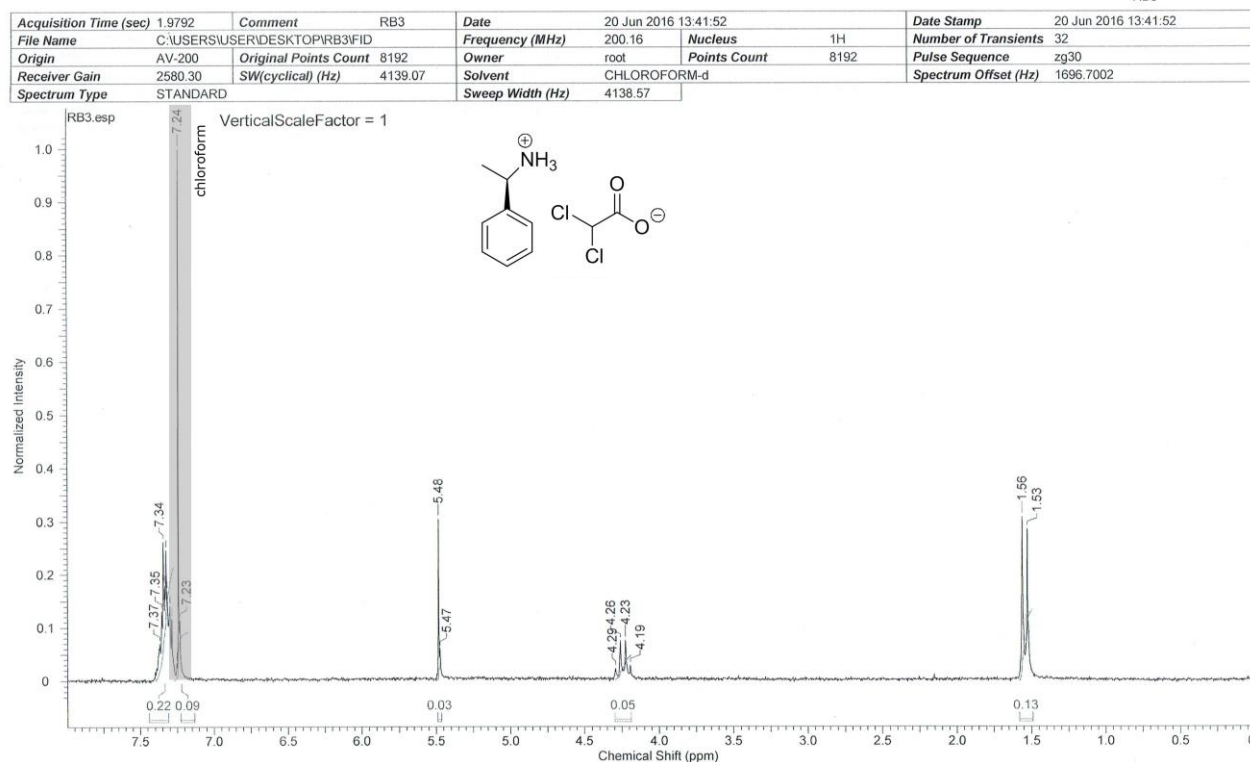

Figure S5  $^1\text{H}$  NMR spectrum of **(R)-DCA**.

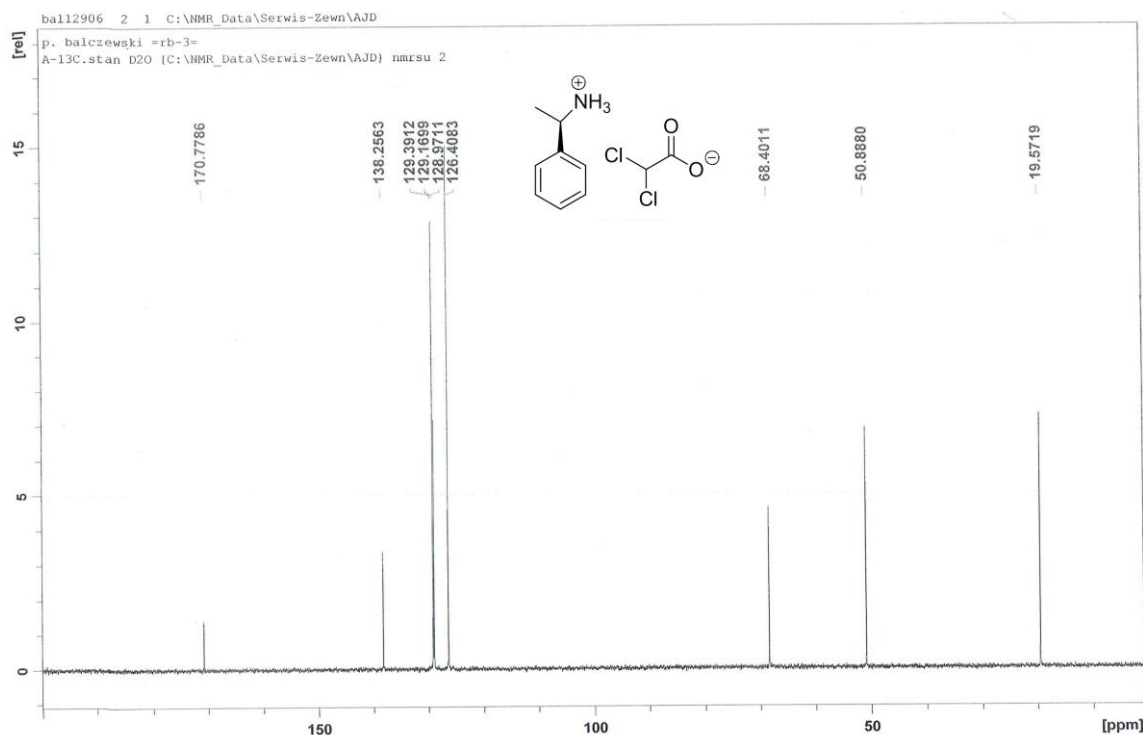

Figure S6  $^{13}\text{C}$  NMR spectrum of **(R)-DCA**.

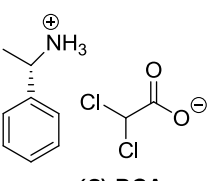
**(S)-DCA**

**(S)-(-)-1-Phenylethylammonium dichloroacetate ((S)-DCA)** m.p. 104-105 °C; ;  $[\alpha]_{25}^D = -3.2$  (1, MeOH);  $^1\text{H}$  NMR (200 MHz,  $\text{CDCl}_3$ )  $\delta$  (ppm) = 1.57 (d, 3H,  $J = 8.0$  Hz,  $\text{CH}_3$ ), 4.26 (q, 1H,  $J = 6.0$  Hz, CH), 5.49 (s, 1H,  $\text{Cl}_2\text{CH}$ ), 7.25-7.36 (m, 5H,  $\text{C}_6\text{H}_5$ );  $^{13}\text{C}$  NMR (126 MHz,  $\text{CDCl}_3$ )  $\delta$  (ppm) = 21.38 (s,  $\text{CH}_3$ ), 51.53 (s, CH), 68.84 (s,  $\text{Cl}_2\text{CH}$ ), 126.56 (s, 2 x  $\text{C}_{\text{Ar}}$ ), 128.65 (s,  $\text{C}_{\text{Ar}}$ ), 129.04 (s, 2 x  $\text{C}_{\text{Ar}}$ ), 139.28 (s,  $\text{C}_{\text{Ar}}$ ), 169.74 (s,  $\text{COO}^-$ ); MS-FAB (-):  $m/z$  (%) = 127, 129, 131 ( $\text{Cl}_2\text{CHCOO}^-$ ,  $^{35}\text{Cl}/^{37}\text{Cl}$ , 100, 68, 10); 255, 257, 259, 261 [ $2(\text{Cl}_2\text{CH}_2\text{COO}^-) + 1$ ,  $^{35}\text{Cl}/^{37}\text{Cl}$ , 38, 50, 29, 6]; MS-FAB (+):  $m/z$  (%) = 122 [ $\text{C}_6\text{H}_5\text{CH}(\text{CH}_3)\text{NH}_3^+$ , 100]; Anal. Calcd for  $\text{C}_{10}\text{H}_{13}\text{Cl}_2\text{NO}_2$ : C, 48.02; H, 5.24; N, 5.60; Cl, 28.35 Found: C, 48.17; H, 5.31; N, 5.63; Cl, 28.38.

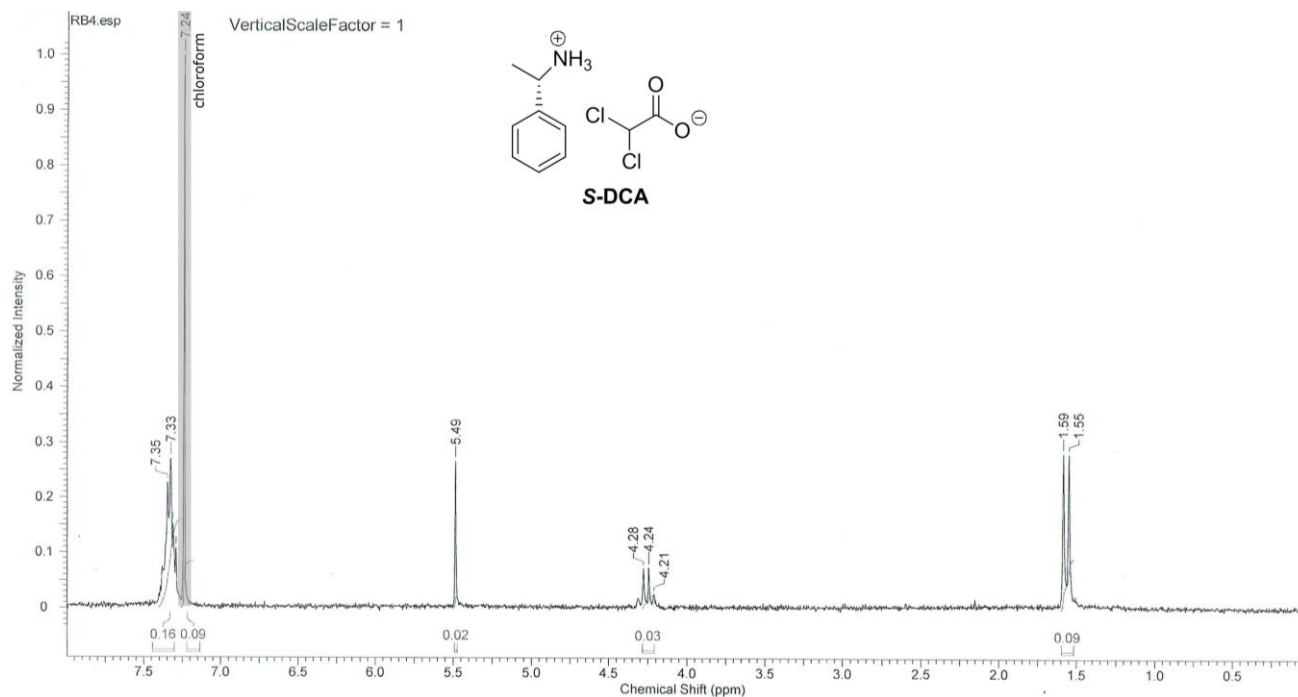

Figure S7  $^1\text{H}$  NMR spectrum of (S)-DCA.

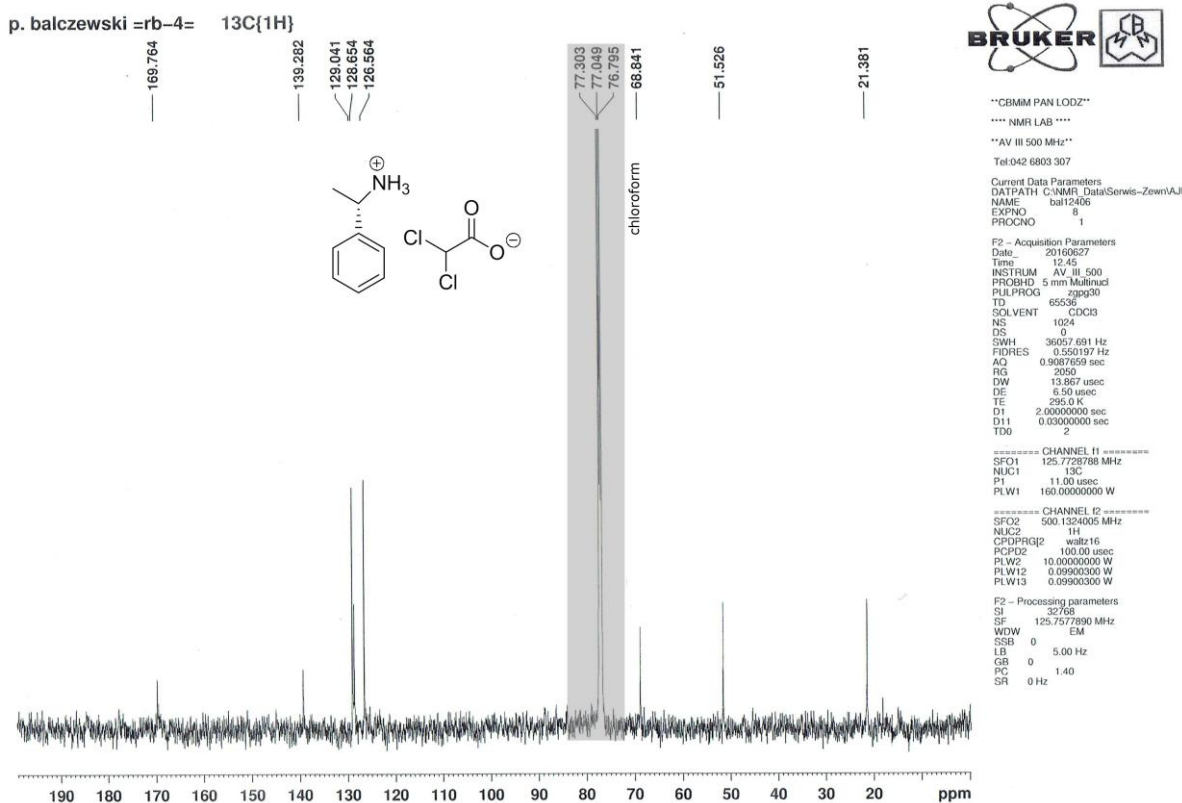

Figure S8  $^{13}\text{C}$  NMR spectrum of (S)-DCA.



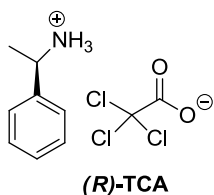

**(R)-(+)-1-Phenylethylammonium trichloroacetate ((R)-TCA)** m.p. 82-84 °C; ;  $[\alpha]_{25}^D = +11.4$  (1, MeOH);  $^1\text{H}$  NMR (200 MHz,  $\text{CDCl}_3$ )  $\delta$  (ppm) = 1.55 (d, 3H,  $J = 6.0$  Hz,  $\text{CH}_3$ ), 4.24 (q, 1H,  $J = 6.0$  Hz, CH), 5.59 (br s, 3H,  $\text{NH}_3^+$ ), 7.25-7.39 (m, 5H,  $\text{C}_6\text{H}_5$ );  $^{13}\text{C}$  NMR (126 MHz,  $\text{CDCl}_3$ )  $\delta$  (ppm) = 20.97 (s,  $\text{CH}_3$ ), 51.78 (s, CH), 95.74 (s,  $\text{CCl}_3$ ), 126.88 (s, 2 x  $\text{C}_{\text{Ar}}$ ), 128.77 (s,  $\text{C}_{\text{Ar}}$ ), 129.03 (s, 2 x  $\text{C}_{\text{Ar}}$ ), 138.83 (s,  $\text{C}_{\text{Ar}}$ ), 165.78 (s,  $\text{COO}^-$ ); MS-FAB (-):  $m/z$  (%) = 161, 163, 165, 167 ( $\text{Cl}_3\text{CCOO}^-$ ,  $^{35}\text{Cl}/^{37}\text{Cl}$ , 100, 95, 30, 7); 323, 325, 327, 329, 331, 333 [ $2(\text{Cl}_3\text{CCOO}^-) + 1$ ,  $^{35}\text{Cl}/^{37}\text{Cl}$ , 20, 42, 30, 17, 6, 3]; MS-FAB (+):  $m/z$  (%) = 122 [ $\text{C}_6\text{H}_5\text{CH}(\text{CH}_3)\text{NH}_3^+$ , 100]; Anal. Calcd for  $\text{C}_{10}\text{H}_{12}\text{Cl}_3\text{NO}_2$ : C, 42.21; H, 4.25; N, 4.92; Found: C, 42.35; H, 4.31; N, 4.96.

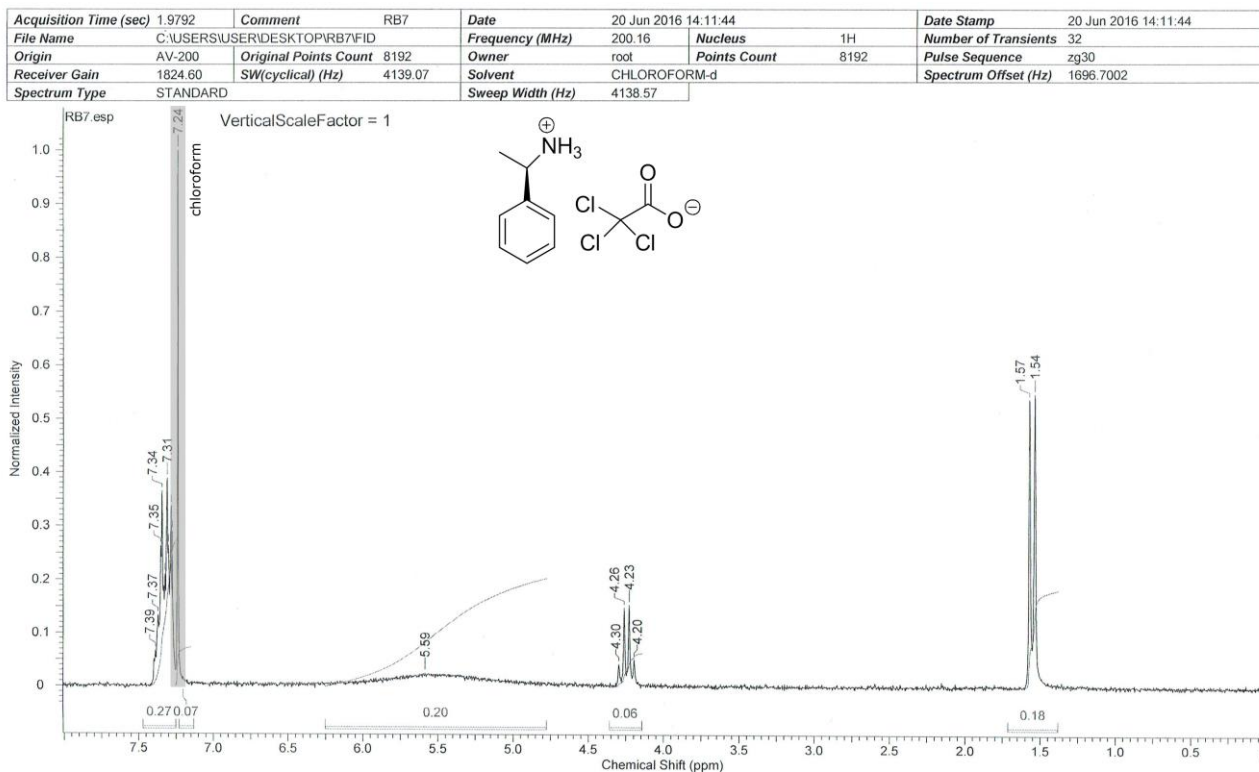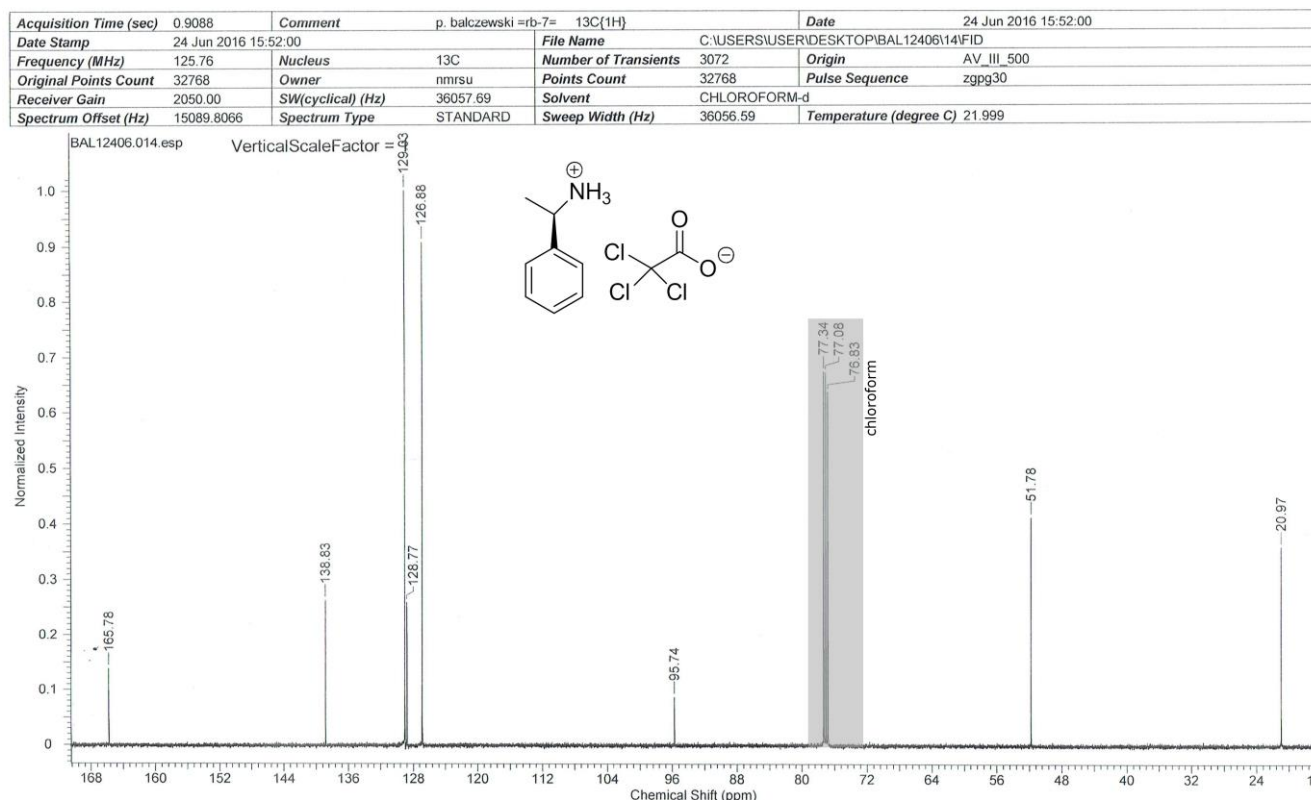

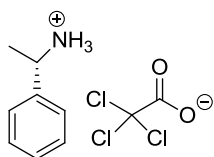

**(S)-TCA**

**(S)-(-)-1-Phenylethylammonium trichloroacetate ((S)-TCA)** m.p. 81-83 °C; ;  $[\alpha]_{25}^D = -11.9$  (1, MeOH);  $^1\text{H}$  NMR (200 MHz,  $\text{CDCl}_3$ )  $\delta$  (ppm) = 1.55 (d, 3H,  $J = 6.0$  Hz,  $\text{CH}_3$ ), 4.26 (q, 1H,  $J = 8.0$  Hz, CH), 7.26-7.37 (m, 5H,  $\text{C}_6\text{H}_5$ );  $^{13}\text{C}$  NMR (126 MHz,  $\text{CDCl}_3$ )  $\delta$  (ppm) = 21.14 (s,  $\text{CH}_3$ ), 51.20 (s, CH), 95.73 (s,  $\text{CCl}_3$ ), 126.80 (s, 2 x  $\text{C}_{\text{Ar}}$ ), 128.73 (s,  $\text{C}_{\text{Ar}}$ ), 129.03 (s, 2 x  $\text{C}_{\text{Ar}}$ ), 139.05 (s,  $\text{C}_{\text{Ar}}$ ), 165.85 (s,  $\text{COO}^-$ ); MS-FAB (-):  $m/z$  (%) = 161, 163, 165, 167 ( $\text{Cl}_3\text{CCOO}^-$ ,  $^{35}\text{Cl}/^{37}\text{Cl}$ , 100, 96, 31, 4); 323, 325, 327, 329, 331, 333 [ $2(\text{Cl}_3\text{CCOO}^-) + 1$ ,  $^{35}\text{Cl}/^{37}\text{Cl}$ , 24, 48, 35, 17, 4, 1]; MS-FAB (+):  $m/z$  (%) = 122 [ $\text{C}_6\text{H}_5\text{CH}(\text{CH}_3)\text{NH}_3^+$ , 100]; Anal. Calcd for  $\text{C}_{10}\text{H}_{12}\text{Cl}_3\text{NO}_2$ : C, 42.21; H, 4.25; N, 4.92; Found: C, 42.39; H, 4.42; N, 5.01.

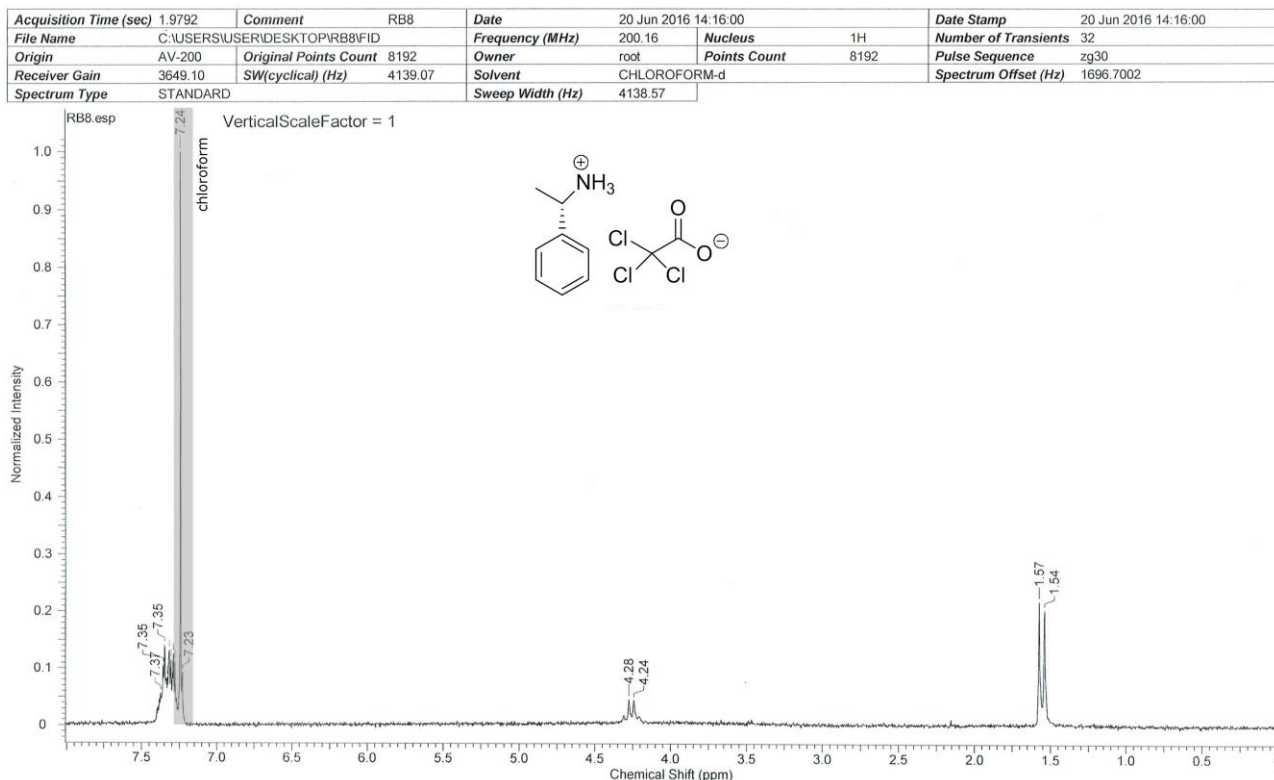

Figure S11  $^1\text{H}$  NMR spectrum of (S)-TCA.

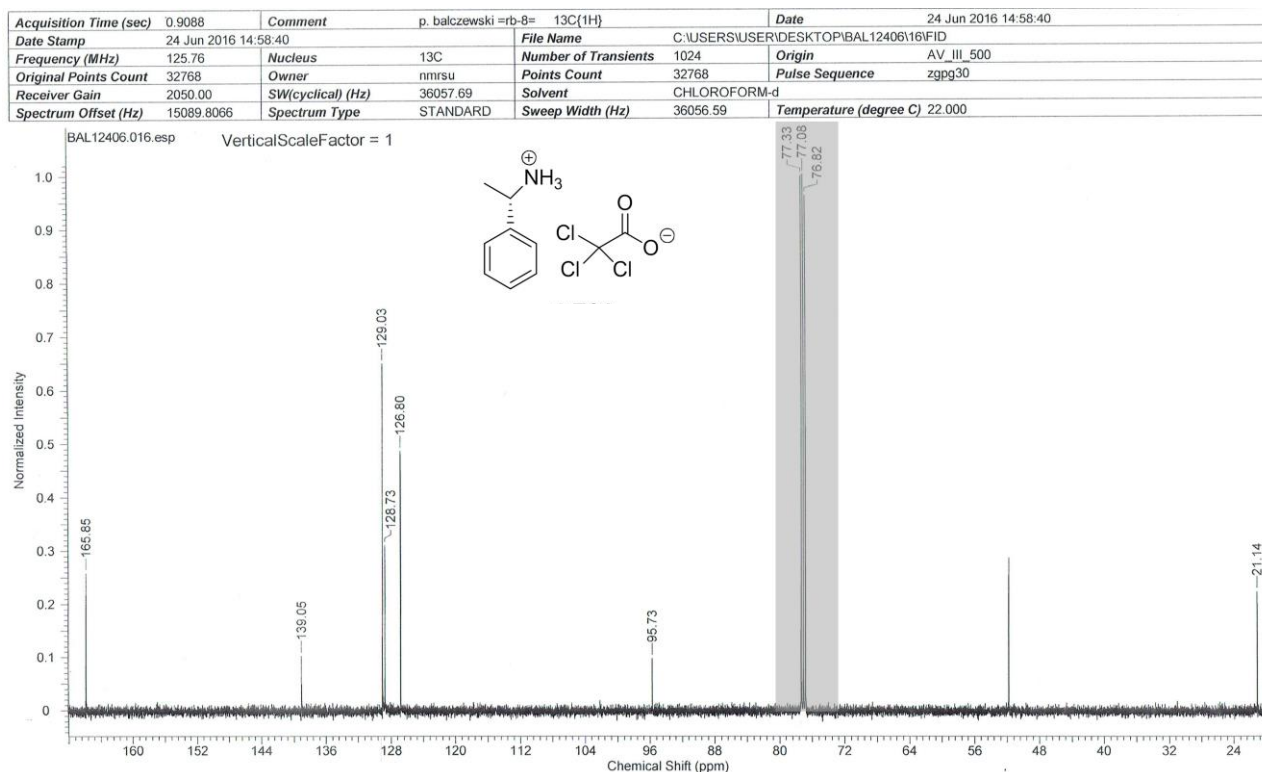

Figure S12  $^{13}\text{C}$  NMR spectrum of (S)-TCA.



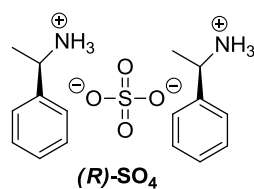

**(R)-(+)-1-Phenylethylammonium sulfate ((R)-SO<sub>4</sub>)** m.p. 242-248 °C; ;  $[\alpha]_{25}^D = +4.5$  (1, MeOH); <sup>1</sup>H NMR (200 MHz, MeOD)  $\delta$  (ppm) = 1.62 (d, 6H, J = 8.0 Hz, 2 x CH<sub>3</sub>), 4.46 (q, 2H, J = 6.0 Hz, 2 x CH), 7.35-7.48 (m, 10H, 2 x C<sub>6</sub>H<sub>5</sub>); <sup>13</sup>C NMR (50 MHz, MeOD)  $\delta$  (ppm) = 19.55 (s, 2 x CH<sub>3</sub>), 50.78 (s, 2 x CH), 126.34 (s, 2 x C<sub>Ar</sub>), 128.47 (s, 4 x C<sub>Ar</sub>), 128.76 (s, 4 x C<sub>Ar</sub>), 138.77 (s, 2 x C<sub>Ar</sub>); HRMS [TOF ES+] for [M+1, 100], Calcd for C<sub>16</sub>H<sub>25</sub>N<sub>2</sub>O<sub>4</sub>S: 341.1535, Found: 341.1542; Anal. Calcd for C<sub>16</sub>H<sub>24</sub>N<sub>2</sub>O<sub>4</sub>S: C, 56.45; H, 7.11; N, 8.23; S, 9.42; Found: C, 56.72; H, 7.12; N, 8.21; S, 9.48.

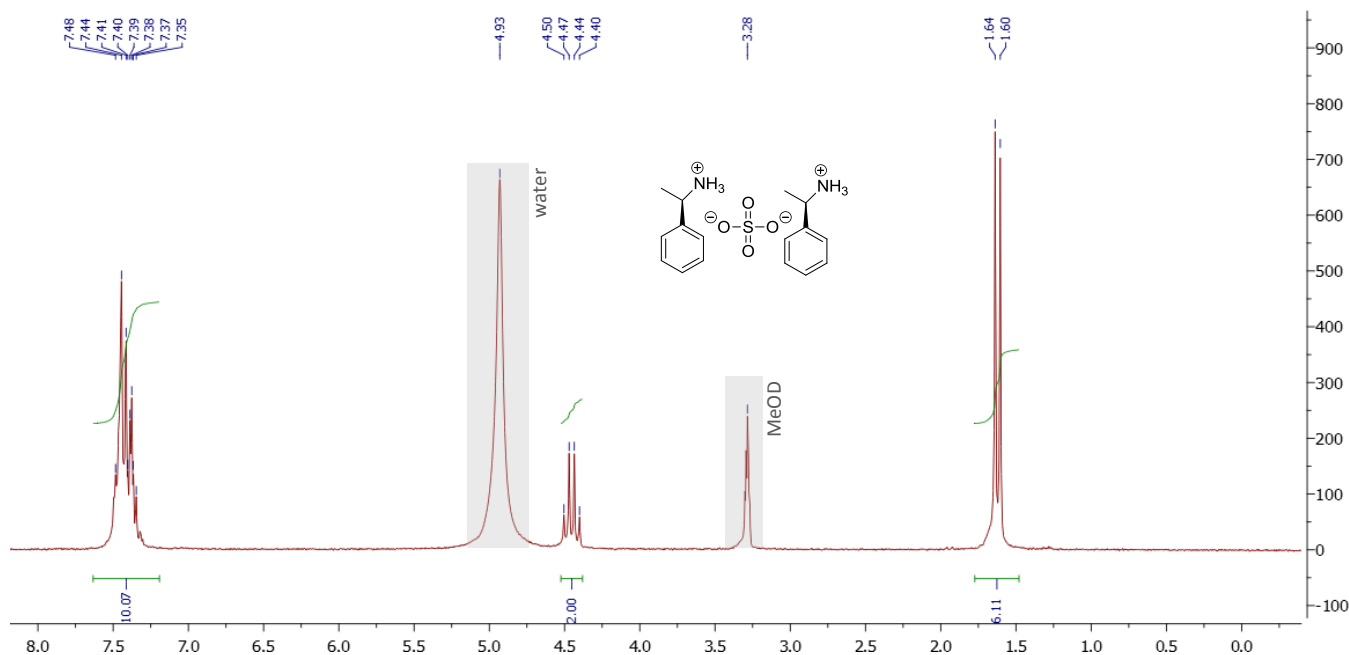

Figure S13 <sup>1</sup>H NMR spectrum of (R)-SO<sub>4</sub>.

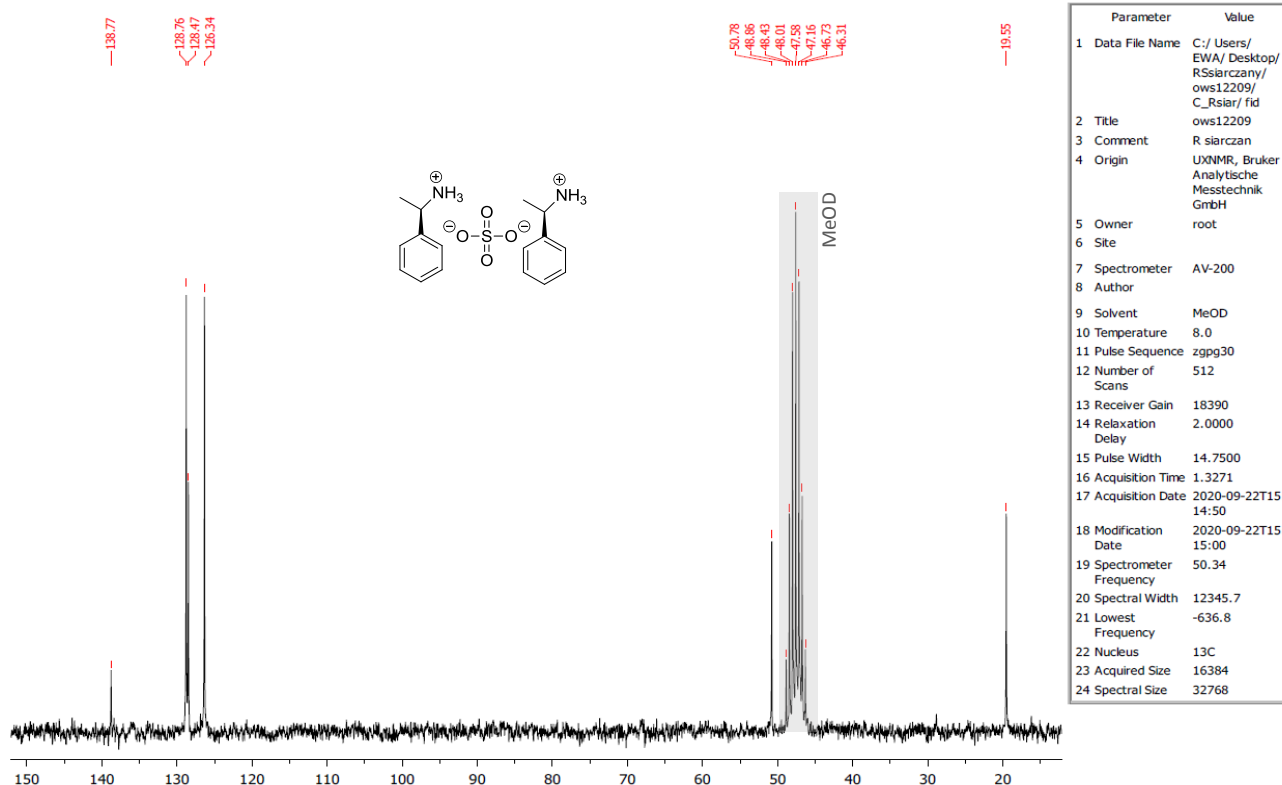

Figure S14 <sup>13</sup>C NMR spectrum of (R)-SO<sub>4</sub>.

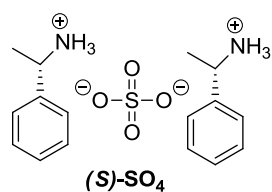

**(S)-(-)-1-Phenylethylammonium sulfate ((S)-SO<sub>4</sub>)** m.p. 241-248 °C; ;  $[\alpha]_{25}^D = -4.8$  (1, MeOH); <sup>1</sup>H NMR (200 MHz, MeOD)  $\delta$  (ppm) = 1.62 (d, 6H, J = 6.0 Hz, 2 x CH<sub>3</sub>), 4.45 (q, 2H, J = 8.0 Hz, 2 x CH), 7.36-7.49 (m, 10H, 2 x C<sub>6</sub>H<sub>5</sub>); <sup>13</sup>C NMR (50 MHz, MeOD)  $\delta$  (ppm) = 18.24 (s, 2 x CH<sub>3</sub>), 49.50 (s, 2 x CH), 125.05 (s, 2 x C<sub>Ar</sub>), 127.21 (s, 4 x C<sub>Ar</sub>), 127.49 (s, 4 x C<sub>Ar</sub>), 137.47 (s, 2 x C<sub>Ar</sub>); HRMS [TOF ES<sup>+</sup>] for [M+1, 100], Calcd for C<sub>16</sub>H<sub>25</sub>N<sub>2</sub>O<sub>4</sub>S: 341.1535, Found: 341.1543; Anal. Calcd for C<sub>16</sub>H<sub>24</sub>N<sub>2</sub>O<sub>4</sub>S: C, 56.45; H, 7.11; N, 8.23; S, 9.42, Found: C, 56.69; H, 7.10; N, 8.24; S, 9.50.

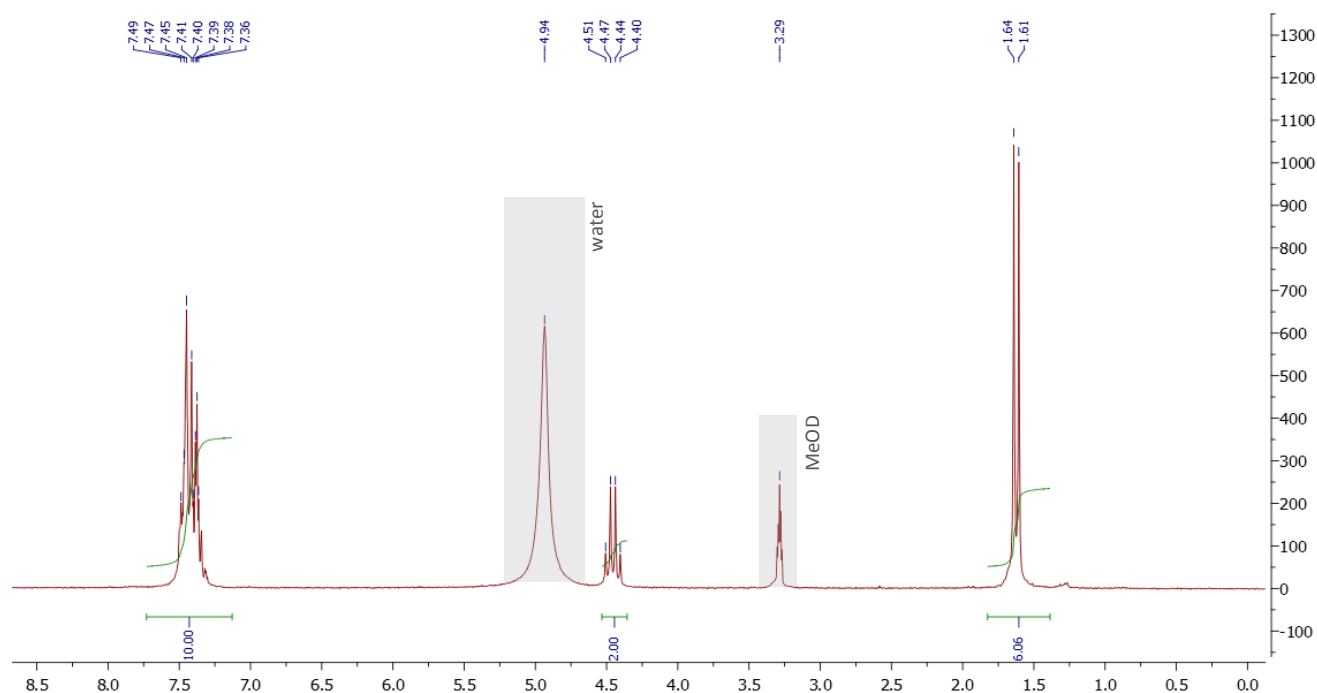

Figure S15 <sup>1</sup>H NMR spectrum of (S)-SO<sub>4</sub>.

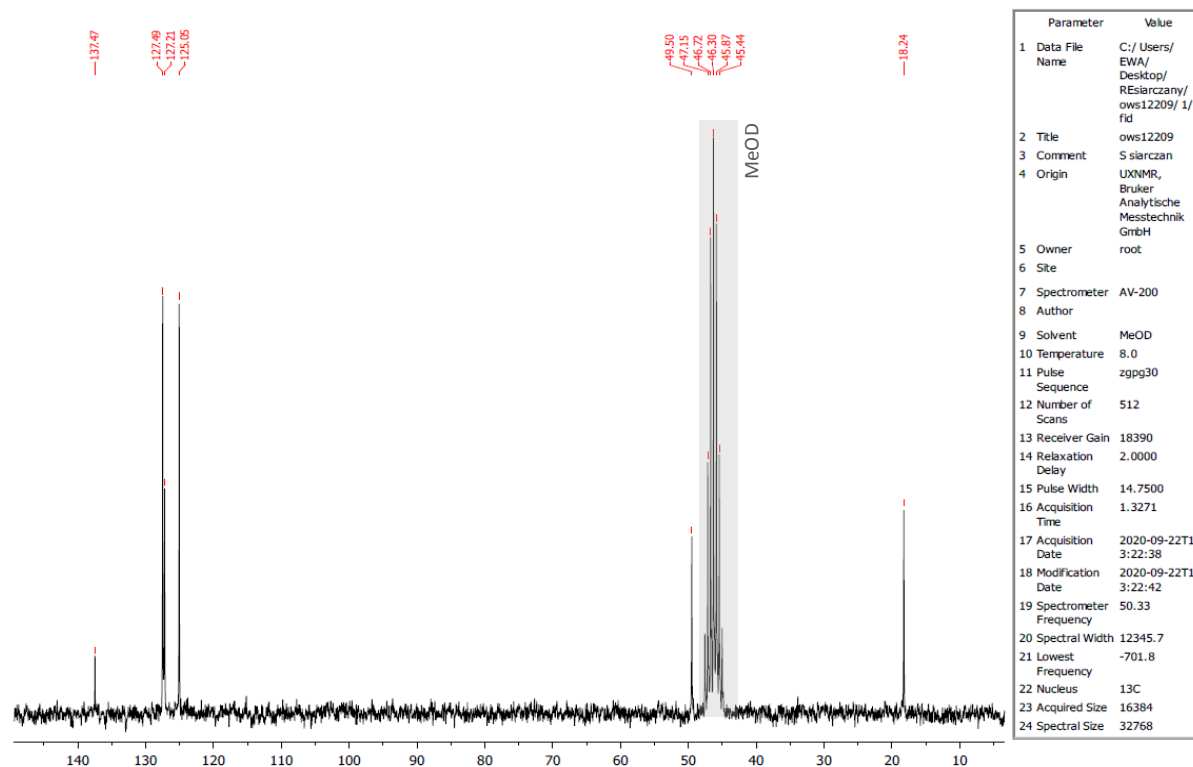

Figure S16 <sup>13</sup>C NMR spectrum of (S)-SO<sub>4</sub>.

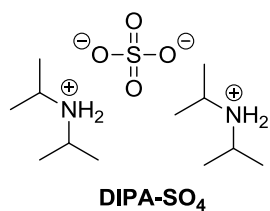

**Diisopropylammonium sulfate (DIPA-SO<sub>4</sub>)** m.p. 182-185 °C; <sup>1</sup>H NMR (200 MHz, MeOD) δ (ppm) = 1.32 (d, 24H, J = 8.0 Hz, 4 x CH<sub>3</sub>), 4.96 (s, 4H, 4 x CH); <sup>13</sup>C NMR (50 MHz, MeOD) δ (ppm) = 18.00 (s, 4 x CH<sub>3</sub>), 46.79 (s, 4 x CH); HRMS [TOF ES+] for [M+1, 100]: Calcd: 301.2161; Found: 301.2161; HRMS [TOF ES+] for 102 [C<sub>6</sub>H<sub>16</sub>N<sup>+</sup>, 100], Calcd: 102.1283, Found: 102.1279; Anal. Calcd for C<sub>12</sub>H<sub>32</sub>N<sub>2</sub>O<sub>4</sub>S: C, 47.97; H, 10.73; N, 9.32; S, 10.67; Found: C, 47.91; H, 10.53; N, 9.35; S, 11.02.

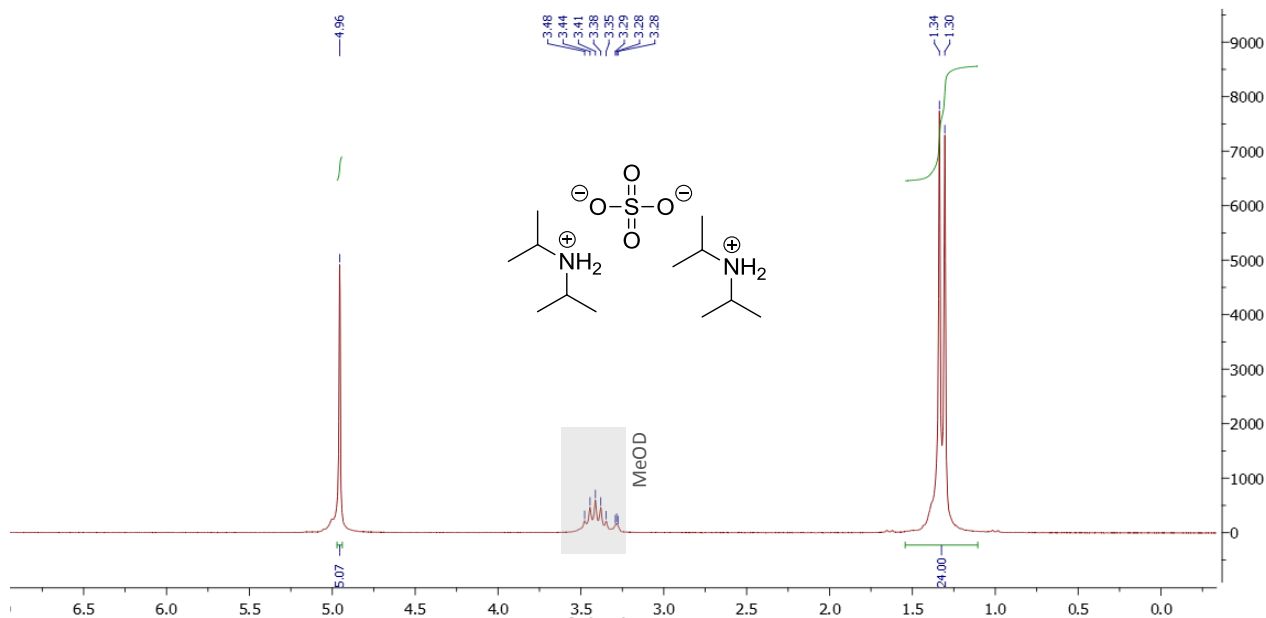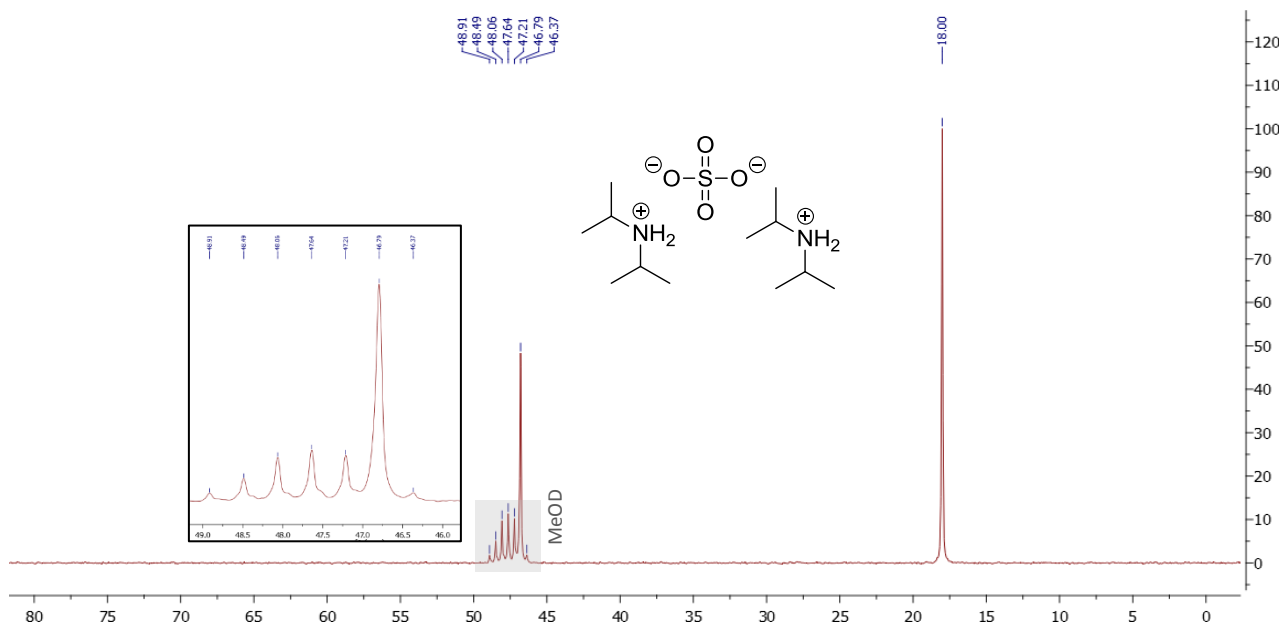

## 2. X-ray crystal structure determination of diisopropylammonium sulfate (DIPA-SO<sub>4</sub>)

**Crystallographic data for DIPA-SO<sub>4</sub>:** 2C<sub>6</sub>H<sub>16</sub>N<sup>+</sup>·SO<sub>4</sub><sup>2-</sup>, M=300.46, monoclinic, P2<sub>1</sub>/n, a = 8.7824(2) Å, b = 8.82350(10) Å, c = 22.0837(4) Å, β = 95.202(2)°, V = 1704.25(5) Å<sup>3</sup>, Z = 4, D<sub>c</sub> = 1.171 g/cm<sup>3</sup>, F(000)=664, crystal size 0.55x0.48x0.36 mm. Diffraction data were collected at 293(2) K, using an Oxford Diffraction Xcalibur<sup>TM</sup>3 diffractometer (graphite-monochromated CuKα radiation, CCD detector). The structure was solved by direct methods and refined by full-matrix least-squares on F<sup>2</sup> with SHELXS-97 and SHELXL-97, respectively. The disorder on oxygen atoms of SO<sub>4</sub><sup>2-</sup> anion was refined over two positions with the occupancy factor for the major component of 0.854(8). All non-hydrogen atoms were refined anisotropically. H atoms of methyl groups were positioned geometrically and constrained to ride on their parent atoms, with C-H distances of 0.96 Å and with U<sub>iso</sub> values of 1.5U<sub>eq</sub>(C). All other hydrogen atoms were located in a difference Fourier maps and refined isotropically with N-H and C-H distances in the ranges of 0.79(2)-0.92(2) Å and 0.91(2)-0.98(2) Å, respectively. R1=0.0349 and wR2=0.0960 for 2879 reflections with F<sup>2</sup> > 2σ(F<sup>2</sup>) and 226 parameters; R1=0.0366 and wR2=0.0979 for 3063 unique reflections, S=1.035. Further details on the crystal structure investigation have been deposited with the Cambridge Crystallographic Data Centre as supplementary publication number CCDC: 2073361.

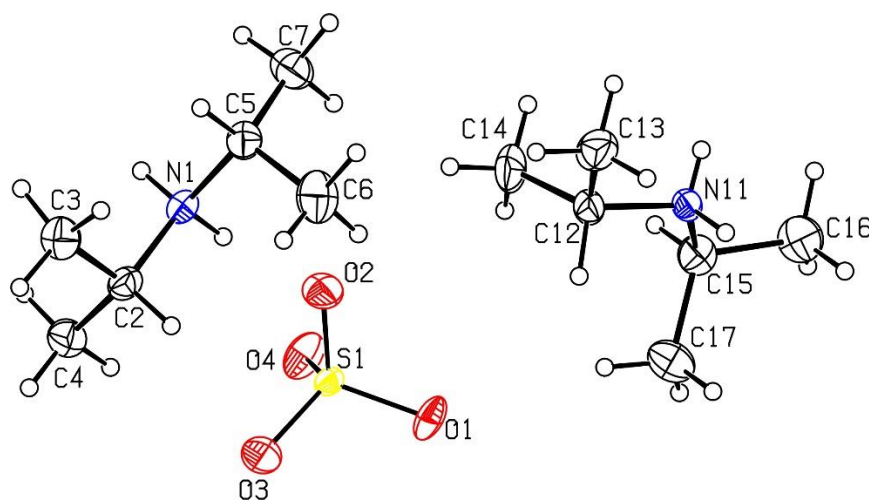

Figure. S18. A view of the asymmetric part of unit cell of DIPA-SO<sub>4</sub> with the atom numbering scheme and displacement ellipsoids drawn at the 30 % probability level. The minor component on oxygen atoms of SO<sub>4</sub><sup>2-</sup> anion has been omitted for clarity.

### **3. Phytotoxicity studies**

**Table S1.** Variations in the yield of fresh weight (FW, g/pot), dry weight (DW, g/g f.m.) and germination for spring barley as the effect of increasing concentration of quaternary ammonium salts (QASs) in soil (in mg/kg of soil d.w.). Data are means  $\pm$  SD from 3 independent experiments. Values denoted with the same letters do not differ statistically at the level of  $p < 0.05$  (Tukey's HSD test).

| IL                   |         | Concentration of QAS [mg/kg of soil d.w.] |                             |                              |                            |                            |                            |                            |                             | LSD <sub>0.95</sub> |
|----------------------|---------|-------------------------------------------|-----------------------------|------------------------------|----------------------------|----------------------------|----------------------------|----------------------------|-----------------------------|---------------------|
|                      |         | 0                                         | 1                           | 10                           | 100                        | 200                        | 400                        | 800                        | 1000                        |                     |
| Spring barley        |         |                                           |                             |                              |                            |                            |                            |                            |                             |                     |
| (R)-MCA              | FW      | 4.495±0.047 <sup>a</sup>                  | 4.258±0.135 <sup>ab</sup>   | 4.368±0.461 <sup>ab</sup>    | 4.781±0.177 <sup>a</sup>   | 4.743±0.151 <sup>a</sup>   | 4.811±0.097 <sup>a</sup>   | 3.800±0.139 <sup>b</sup>   | 2.327±0.144 <sup>c</sup>    | 0.212               |
|                      | DW      | 0.0790±0.0039 <sup>bc</sup>               | 0.0789±0.0033 <sup>bc</sup> | 0.0780±0.0020 <sup>c</sup>   | 0.0773±0.0031 <sup>c</sup> | 0.0759±0.0013 <sup>c</sup> | 0.0755±0.0029 <sup>c</sup> | 0.0842±0.0032 <sup>b</sup> | 0.1041±0.0035 <sup>a</sup>  | 0.0030              |
|                      | sprouts | 20 <sup>a</sup>                           | 20 <sup>a</sup>             | 18±1 <sup>b</sup>            | 20 <sup>a</sup>            | 20 <sup>a</sup>            | 20 <sup>a</sup>            | 19±1 <sup>ab</sup>         | 19±1 <sup>ab</sup>          | 1                   |
| (S)-MCA              | FW      | 4.495±0.47 <sup>a</sup>                   | 4.398±0.105 <sup>a</sup>    | 4.364±0.260 <sup>a</sup>     | 4.064±0.237 <sup>a</sup>   | 4.570±0.420 <sup>a</sup>   | 4.842±0.213 <sup>a</sup>   | 4.534±0.477 <sup>a</sup>   | 3.210±0.296 <sup>b</sup>    | 0.230               |
|                      | DW      | 0.790±0.0039 <sup>b</sup>                 | 0.0771±0.0020 <sup>b</sup>  | 0.0786±0.0021 <sup>b</sup>   | 0.0766±0.0020 <sup>b</sup> | 0.0735±0.0090 <sup>b</sup> | 0.0752±0.0024 <sup>b</sup> | 0.0783±0.0036 <sup>b</sup> | 0.0895±0.0026 <sup>a</sup>  | 0.0041              |
|                      | sprouts | 20 <sup>a</sup>                           | 20±1 <sup>a</sup>           | 19±2 <sup>ab</sup>           | 18±1 <sup>b</sup>          | 19±1 <sup>ab</sup>         | 20 <sup>a</sup>            | 20 <sup>a</sup>            | 19±1 <sup>ab</sup>          | 1                   |
| (R)-DCA              | FW      | 5.083±0.086 <sup>a</sup>                  | 4.941±0.169 <sup>a</sup>    | 4.956±0.256 <sup>a</sup>     | 5.064±0.390 <sup>a</sup>   | 5.011±0.127 <sup>a</sup>   | 4.499±0.092 <sup>a</sup>   | 3.406±0.218 <sup>b</sup>   | 3.277±0.378 <sup>b</sup>    | 0.250               |
|                      | DW      | 0.757±0.0041 <sup>c</sup>                 | 0.0735±0.0030 <sup>c</sup>  | 0.0715±0.0028 <sup>c</sup>   | 0.0756±0.0010 <sup>c</sup> | 0.0711±0.0028 <sup>c</sup> | 0.0751±0.0030 <sup>c</sup> | 0.0863±0.0019 <sup>b</sup> | 0.1069±0.0018 <sup>a</sup>  | 0.0027              |
|                      | sprouts | 19±1 <sup>a</sup>                         | 19±1 <sup>a</sup>           | 19±1 <sup>a</sup>            | 20 <sup>a</sup>            | 19±1 <sup>a</sup>          | 19±1 <sup>a</sup>          | 19±1 <sup>a</sup>          | 20 <sup>a</sup>             | 1                   |
| (S)-DCA              | FW      | 5.083±0.089 <sup>a</sup>                  | 5.327±0.245 <sup>a</sup>    | 4.973±0.481 <sup>a</sup>     | 5.620±0.310 <sup>a</sup>   | -                          | -                          | -                          | 5.539±0.477 <sup>a</sup>    | 0.476               |
|                      | DW      | 0.0757±0.0041 <sup>a</sup>                | 0.0739±0.0026 <sup>a</sup>  | 0.0746±0.0019 <sup>a</sup>   | 0.0733±0.0033 <sup>a</sup> | -                          | -                          | -                          | 0.0736±0.0039 <sup>a</sup>  | 0.0042              |
|                      | sprouts | 19±1 <sup>ab</sup>                        | 20 <sup>a</sup>             | 19±1 <sup>b</sup>            | 20 <sup>a</sup>            | -                          | -                          | -                          | 19±1 <sup>ab</sup>          | 1                   |
| (R)-SO <sub>4</sub>  | FW      | 3.815±0.140 <sup>ab</sup>                 | 3.514±0.235 <sup>abc</sup>  | 3.957±0.047 <sup>a</sup>     | 3.686±0.091 <sup>ab</sup>  | 3.763±0.052 <sup>ab</sup>  | 3.067±0.059 <sup>abc</sup> | 2.384±0.182 <sup>bc</sup>  | 2.193±0.233 <sup>c</sup>    | 0.154               |
|                      | DW      | 0.0746±0.0024 <sup>c</sup>                | 0.0764±0.0014 <sup>c</sup>  | 0.0744±0.0043 <sup>c</sup>   | 0.0809±0.0028 <sup>c</sup> | 0.0765±0.0020 <sup>c</sup> | 0.0783±0.0020 <sup>c</sup> | 0.0891±0.0010 <sup>c</sup> | 0.1029±0.0026 <sup>a</sup>  | 0.0025              |
|                      | sprouts | 19±1 <sup>a</sup>                         | 19±1 <sup>a</sup>           | 20 <sup>a</sup>              | 18 <sup>a</sup>            | 18±2 <sup>a</sup>          | 19±2 <sup>a</sup>          | 18±1 <sup>a</sup>          | 19±2 <sup>a</sup>           | 1                   |
| (S)-SO <sub>4</sub>  | FW      | 3.815±0.140 <sup>a</sup>                  | 3.555±0.015 <sup>a</sup>    | 3.770±0.057 <sup>a</sup>     | 3.532±0.091 <sup>a</sup>   | -                          | -                          | -                          | 3.573±0.131 <sup>a</sup>    | 0.133               |
|                      | DW      | 0.746±0.0024 <sup>c</sup>                 | 0.0769±0.0016 <sup>bc</sup> | 0.0780±0.0010 <sup>abc</sup> | 0.0810±0.0021 <sup>a</sup> | -                          | -                          | -                          | 0.0808±0.0015 <sup>ab</sup> | 0.0024              |
|                      | sprouts | 19±1 <sup>a</sup>                         | 17±1 <sup>a</sup>           | 19 <sup>a</sup>              | 19±1 <sup>a</sup>          | -                          | -                          | -                          | 18 <sup>a</sup>             | 1                   |
| DIPA-SO <sub>4</sub> | FW      | 3.645±0.050 <sup>a</sup>                  | 3.855±0.168 <sup>a</sup>    | 4.055±0.079 <sup>a</sup>     | 4.177±0.100 <sup>a</sup>   | -                          | -                          | -                          | 3.724±0.024 <sup>a</sup>    | 0.132               |
|                      | DW      | 0.0753±0.0016 <sup>a</sup>                | 0.0712±0.0013 <sup>a</sup>  | 0.0730±0.0014 <sup>a</sup>   | 0.0770±0.0047 <sup>a</sup> | -                          | -                          | -                          | 0.0738±0.0010 <sup>a</sup>  | 0.0032              |
|                      | sprouts | 19±1 <sup>a</sup>                         | 18 <sup>a</sup>             | 19 <sup>a</sup>              | 19 <sup>a</sup>            | -                          | -                          | -                          | 19±1 <sup>a</sup>           | 1                   |
|                      |         | Concentration of QAS [mg/kg of soil d.w.] |                             |                              |                            |                            |                            |                            |                             |                     |
|                      |         | 0                                         | 1                           | 10                           | 20                         | 40                         | 80                         | 100                        | 1000                        |                     |
| (R)-TCA              | FW      | 5.155±0.039 <sup>a</sup>                  | 4.968±0.088 <sup>a</sup>    | 4.697±0.070 <sup>a</sup>     | 3.973±0.089 <sup>b</sup>   | 1.724±0.467 <sup>c</sup>   | 0.348±0.002 <sup>d</sup>   | 0.175±0.042 <sup>d</sup>   | -                           | 0.207               |
|                      | DW      | 0.0724±0.0024 <sup>d</sup>                | 0.0743±0.0024 <sup>d</sup>  | 0.0771±0.0022 <sup>d</sup>   | 0.0842±0.0021 <sup>c</sup> | 0.1047±0.0059 <sup>b</sup> | 0.1285±0.0055 <sup>a</sup> | 0.1357±0.0008 <sup>a</sup> | -                           | 0.0037              |
|                      | sprouts | 19±1 <sup>a</sup>                         | 20±1 <sup>a</sup>           | 20±1 <sup>a</sup>            | 19±1 <sup>a</sup>          | 20 <sup>a</sup>            | 20 <sup>a</sup>            | 20 <sup>a</sup>            | 19±1 <sup>a</sup>           | 0                   |
| (S)-TCA              | FW      | 5.155±0.039 <sup>a</sup>                  | 5.191±0.180 <sup>a</sup>    | 5.321±0.231 <sup>a</sup>     | 3.633±0.197 <sup>b</sup>   | 2.595±0.523 <sup>c</sup>   | 1.495±0.083 <sup>d</sup>   | 0.645±0.044 <sup>d</sup>   | -                           | 0.269               |
|                      | DW      | 0.0724±0.0024 <sup>d</sup>                | 0.0725±0.0026 <sup>d</sup>  | 0.0781±0.0031 <sup>d</sup>   | 0.0870±0.0024 <sup>c</sup> | 0.0981±0.0041 <sup>b</sup> | 0.1165±0.0037 <sup>a</sup> | 0.1192±0.0037 <sup>a</sup> | -                           | 0.0036              |
|                      | sprouts | 19±1 <sup>a</sup>                         | 20±1 <sup>a</sup>           | 20±1 <sup>a</sup>            | 20±1 <sup>a</sup>          | 20±1 <sup>a</sup>          | 20±1 <sup>a</sup>          | 20 <sup>a</sup>            | 19±1 <sup>a</sup>           | 1                   |



**Table S2.** Variations in the yield of fresh weight (FW, g/pot), dry weight (DW, g/g f.m.) and germination for common radish as the effect of increasing concentration of quaternary ammonium salts (QASs) in soil (in mg/kg of soil d.w.). Data are means  $\pm$  SD from 3 independent experiments. Values denoted with the same letters do not differ statistically at the level of  $p < 0.05$  (Tukey's HSD test).

| IL                   |         | Concentration of QAS [mg/kg of soil d.w.] |                             |                             |                             |                              |                              |                             |                            | LSD <sub>0.95</sub> |
|----------------------|---------|-------------------------------------------|-----------------------------|-----------------------------|-----------------------------|------------------------------|------------------------------|-----------------------------|----------------------------|---------------------|
|                      |         | 0                                         | 1                           | 10                          | 100                         | 200                          | 400                          | 800                         | 1000                       |                     |
| Common radish        |         |                                           |                             |                             |                             |                              |                              |                             |                            |                     |
| (R)-MCA              | FW      | 5.134±0.857 <sup>a</sup>                  | 5.065±0.131 <sup>a</sup>    | 4.716±0.141 <sup>a</sup>    | 3.736±0.189 <sup>a</sup>    | 5.107±0.697 <sup>a</sup>     | 4.216±0.353 <sup>a</sup>     | 0.490±0.514 <sup>b</sup>    | -                          | 0.510               |
|                      | DW      | 0.0530±0.0022 <sup>c</sup>                | 0.0522±0.0011 <sup>c</sup>  | 0.0530±0.0026 <sup>c</sup>  | 0.0534±0.0011 <sup>c</sup>  | 0.0547±0.0022 <sup>c</sup>   | 0.0642±0.0011 <sup>b</sup>   | 0.1200±0.0011 <sup>a</sup>  | -                          | 0.0019              |
|                      | sprouts | 18 <sup>a</sup>                           | 17±1 <sup>a</sup>           | 17±1 <sup>a</sup>           | 18±1 <sup>a</sup>           | 19±1 <sup>a</sup>            | 19±1 <sup>a</sup>            | 6±4 <sup>b</sup>            | 0±1 <sup>c</sup>           | 2                   |
| (S)-MCA              | FW      | 5.052±0.042 <sup>a</sup>                  | 5.447±0.395 <sup>a</sup>    | 4.618±0.188 <sup>ab</sup>   | 4.806±0.138 <sup>ab</sup>   | 5.104±0.385 <sup>a</sup>     | 4.198±0.335 <sup>ab</sup>    | 3.506±0.295 <sup>b</sup>    | -                          | 0.314               |
|                      | DW      | 0.0530±0.0022 <sup>b</sup>                | 0.0506±0.0029 <sup>b</sup>  | 0.0538±0.0022 <sup>b</sup>  | 0.0547±0.0014 <sup>b</sup>  | 0.0554±0.0035 <sup>b</sup>   | 0.0588±0.0039 <sup>b</sup>   | 0.0791±0.0121 <sup>a</sup>  | -                          | 0.0057              |
|                      | sprouts | 18 <sup>a</sup>                           | 19±2 <sup>a</sup>           | 17±1 <sup>a</sup>           | 18±2 <sup>a</sup>           | 18±1 <sup>a</sup>            | 18 <sup>a</sup>              | 17±2 <sup>a</sup>           | 0±1 <sup>b</sup>           | 1                   |
| (R)-DCA              | FW      | 5.824±0.642 <sup>a</sup>                  | 6.109±0.612 <sup>a</sup>    | 5.542±0.455 <sup>a</sup>    | 5.457±0.310 <sup>a</sup>    | 5.927±0.402 <sup>a</sup>     | 4.456±0.392 <sup>ab</sup>    | 3.275±0.193 <sup>bc</sup>   | 1.808±0.166 <sup>c</sup>   | 0.442               |
|                      | DW      | 0.0540±0.0022 <sup>c</sup>                | 0.0535±0.0026 <sup>c</sup>  | 0.0512±0.0025 <sup>c</sup>  | 0.0560±0.0009 <sup>bc</sup> | 0.0526±0.0031 <sup>c</sup>   | 0.0581±0.0013 <sup>bc</sup>  | 0.0646±0.0050 <sup>b</sup>  | 0.1172±0.0165 <sup>a</sup> | 0.0064              |
|                      | sprouts | 17±2 <sup>a</sup>                         | 18±2 <sup>a</sup>           | 16±1 <sup>a</sup>           | 17±1 <sup>a</sup>           | 19±1 <sup>a</sup>            | 17±1 <sup>a</sup>            | 16±1 <sup>a</sup>           | 17±2 <sup>a</sup>          | 1                   |
| (S)-DCA              | FW      | 5.824±0.642 <sup>a</sup>                  | 5.371±0.263 <sup>ab</sup>   | 5.264±0.001 <sup>ab</sup>   | 5.412±0.0053 <sup>ab</sup>  | 5.542±0.111 <sup>ab</sup>    | 5.883±0.182 <sup>a</sup>     | 5.244±0.238 <sup>ab</sup>   | 4.523±0.186 <sup>b</sup>   | 0.091               |
|                      | DW      | 0.0540±0.0022 <sup>b</sup>                | 0.0569±0.0015 <sup>ab</sup> | 0.0537±0.0020 <sup>b</sup>  | 0.0550±0.0017 <sup>a</sup>  | 0.0552±0.0044 <sup>a</sup>   | 0.0544±0.0024 <sup>b</sup>   | 0.0569±0.0035 <sup>ab</sup> | 0.0599±0.0022 <sup>a</sup> | 0.0027              |
|                      | sprouts | 18±1 <sup>ab</sup>                        | 17±1 <sup>ab</sup>          | 16±1 <sup>b</sup>           | 17±1 <sup>ab</sup>          | 19±1 <sup>a</sup>            | 19±1 <sup>ab</sup>           | 18±1 <sup>ab</sup>          | 18±1 <sup>ab</sup>         | 1                   |
| (R)-SO <sub>4</sub>  | FW      | 6.354±0.334 <sup>ab</sup>                 | 6.008±0.121 <sup>ab</sup>   | 6.569±0.111 <sup>ab</sup>   | 6.643±0.116 <sup>a</sup>    | 5.731±0.138 <sup>abc</sup>   | 5.449±0.177 <sup>bc</sup>    | 4.757±0.347 <sup>cd</sup>   | 4.213±0.122 <sup>d</sup>   | 0.212               |
|                      | DW      | 0.0523±0.0018 <sup>b</sup>                | 0.0559±0.0034 <sup>b</sup>  | 0.0557±0.0009 <sup>b</sup>  | 0.0567±0.0014 <sup>b</sup>  | 0.0560±0.0020 <sup>b</sup>   | 0.0588±0.0014 <sup>b</sup>   | 0.0613±0.0037 <sup>b</sup>  | 0.0922±0.0086 <sup>a</sup> | 0.0037              |
|                      | sprouts | 19±2 <sup>a</sup>                         | 19±1 <sup>a</sup>           | 19±1 <sup>a</sup>           | 20 <sup>a</sup>             | 19±2 <sup>a</sup>            | 19±1 <sup>a</sup>            | 17±1 <sup>a</sup>           | 20 <sup>a</sup>            | 1                   |
| (S)-SO <sub>4</sub>  | FW      | 6.354±0.334 <sup>ab</sup>                 | 7.042±0.137 <sup>a</sup>    | 6.727±0.212 <sup>ab</sup>   | 5.808±0.039 <sup>ab</sup>   | 5.187±0.015 <sup>ab</sup>    | 4.947±0.025 <sup>ab</sup>    | 4.767±0.0003 <sup>ab</sup>  | 4.336±0.105 <sup>b</sup>   | 0.158               |
|                      | DW      | 0.0523±0.0018 <sup>c</sup>                | 0.0549±0.0005 <sup>c</sup>  | 0.0532±0.0030 <sup>c</sup>  | 0.0573±0.0009 <sup>bc</sup> | 0.0586±0.0009 <sup>abc</sup> | 0.0587±0.0021 <sup>abc</sup> | 0.0634±0.004 <sup>ab</sup>  | 0.655±0.0039 <sup>a</sup>  | 0.0025              |
|                      | sprouts | 19±1 <sup>a</sup>                         | 19±1 <sup>a</sup>           | 19±1 <sup>a</sup>           | 19±1 <sup>a</sup>           | 18 <sup>a</sup>              | 18±1 <sup>a</sup>            | 18±1 <sup>a</sup>           | 19±1 <sup>a</sup>          | 1                   |
| DIPA-SO <sub>4</sub> | FW      | 6.507±0.155 <sup>abc</sup>                | 6.702±0.144 <sup>a</sup>    | 6.595±0.195 <sup>ab</sup>   | 6.096±0.085 <sup>abcd</sup> | 5.551±0.059 <sup>bcde</sup>  | 5.483±0.107 <sup>cde</sup>   | 5.369±0.029 <sup>de</sup>   | 4.598±0.022 <sup>e</sup>   | 0.150               |
|                      | DW      | 0.0537±0.0012 <sup>ab</sup>               | 0.0524±0.0017 <sup>b</sup>  | 0.0500±0.0021 <sup>b</sup>  | 0.0541±0.0013 <sup>ab</sup> | 0.0533±0.0017 <sup>b</sup>   | 0.0542±0.0016 <sup>ab</sup>  | 0.0583±0.0024 <sup>a</sup>  | 0.583±0.0017 <sup>a</sup>  | 0.0018              |
|                      | sprouts | 19±1 <sup>a</sup>                         | 19±1 <sup>a</sup>           | 19±1 <sup>a</sup>           | 19 <sup>a</sup>             | 18±1 <sup>a</sup>            | 18±1 <sup>a</sup>            | 18±1 <sup>a</sup>           | 18±1 <sup>a</sup>          | 1                   |
|                      |         | Concentration of QAS [mg/kg of soil d.w.] |                             |                             |                             |                              |                              |                             |                            |                     |
|                      |         | 0                                         | 1                           | 10                          | 20                          | 40                           | 80                           | 100                         | 1000                       |                     |
| (R)-TCA              | FW      | 8.430±0.441 <sup>ab</sup>                 | 8.512±0.640 <sup>a</sup>    | 8.481±0.281 <sup>ab</sup>   | 7.991±0.578 <sup>abc</sup>  | 7.403±0.253 <sup>bc</sup>    | 7.081±0.284 <sup>c</sup>     | 7.031±0.356 <sup>c</sup>    | 3.770±0.180 <sup>d</sup>   | 0.420               |
|                      | DW      | 0.0503±0.0010 <sup>cd</sup>               | 0.0491±0.0015 <sup>d</sup>  | 0.0524±0.0017 <sup>cd</sup> | 0.0530±0.0018 <sup>c</sup>  | 0.0575±0.0024 <sup>b</sup>   | 0.0569±0.0023 <sup>b</sup>   | 0.0593±0.0025 <sup>b</sup>  | 0.0810±0.0028 <sup>a</sup> | 0.0021              |
|                      | sprouts | 20 <sup>a</sup>                           | 20 <sup>a</sup>             | 20 <sup>a</sup>             | 20±1 <sup>a</sup>           | 20 <sup>a</sup>              | 20 <sup>a</sup>              | 20 <sup>a</sup>             | 20±1 <sup>a</sup>          | 0                   |
| (S)-TCA              | FW      | 8.430±0.441 <sup>a</sup>                  | 7.800±0.222 <sup>ab</sup>   | 8.387±0.435 <sup>a</sup>    | 8.359±0.100 <sup>a</sup>    | 7.725±0.520 <sup>ab</sup>    | 6.832±0.15 <sup>b</sup>      | 6.830±0.397 <sup>b</sup>    | 2.581±0.532 <sup>c</sup>   | 0.369               |
|                      | DW      | 0.0503±0.0010 <sup>b</sup>                | 0.0516±0.0013 <sup>b</sup>  | 0.0498±0.0016 <sup>b</sup>  | 0.0523±0.0014 <sup>b</sup>  | 0.0538±0.0015 <sup>b</sup>   | 0.0557±0.0015 <sup>b</sup>   | 0.0584±0.0005 <sup>b</sup>  | 0.1298±0.0281 <sup>a</sup> | 0.0101              |
|                      | sprouts | 20 <sup>a</sup>                           | 20 <sup>a</sup>             | 20±1 <sup>a</sup>           | 20 <sup>a</sup>             | 20±1 <sup>a</sup>            | 19±1 <sup>a</sup>            | 20 <sup>a</sup>             | 20±1 <sup>a</sup>          | 1                   |

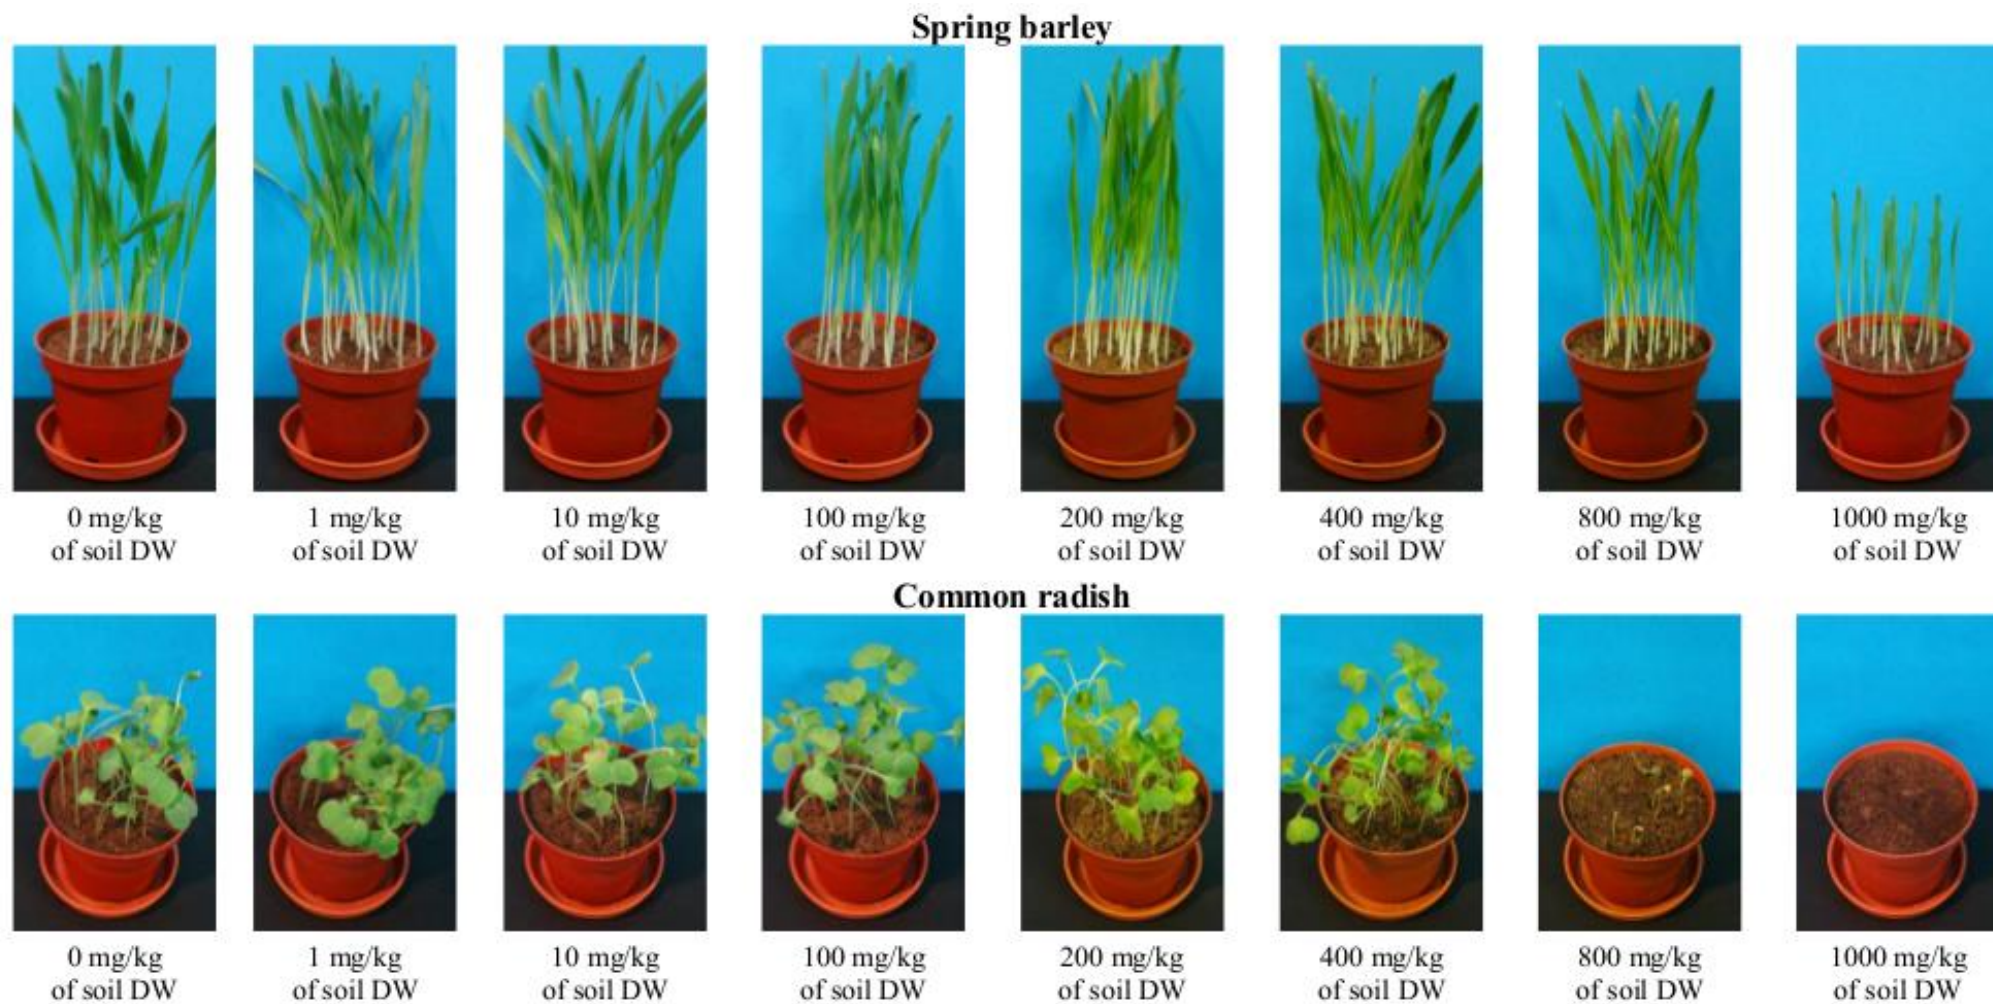

Figure S19. Digital photographs of plants seedlings in soil treated with aqueous solutions of (*R*)-MCA.

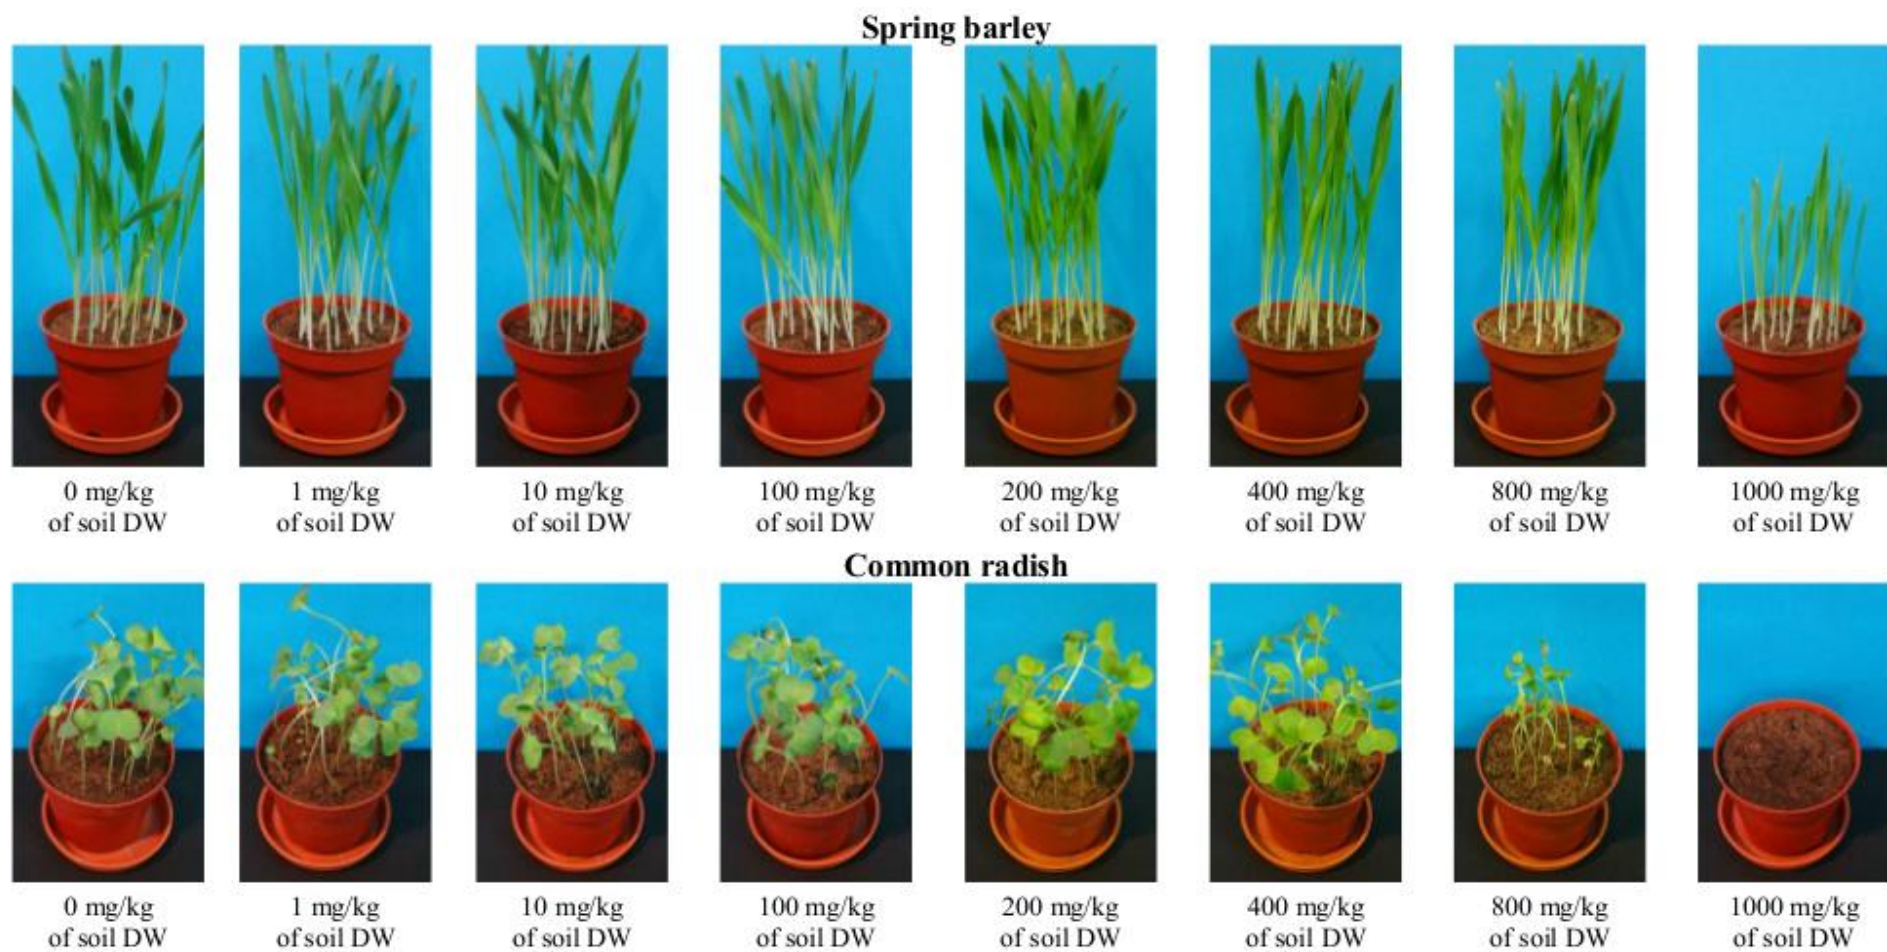

Figure S20. Digital photographs of plants seedlings in soil treated with aqueous solutions of *(S)*-MCA.



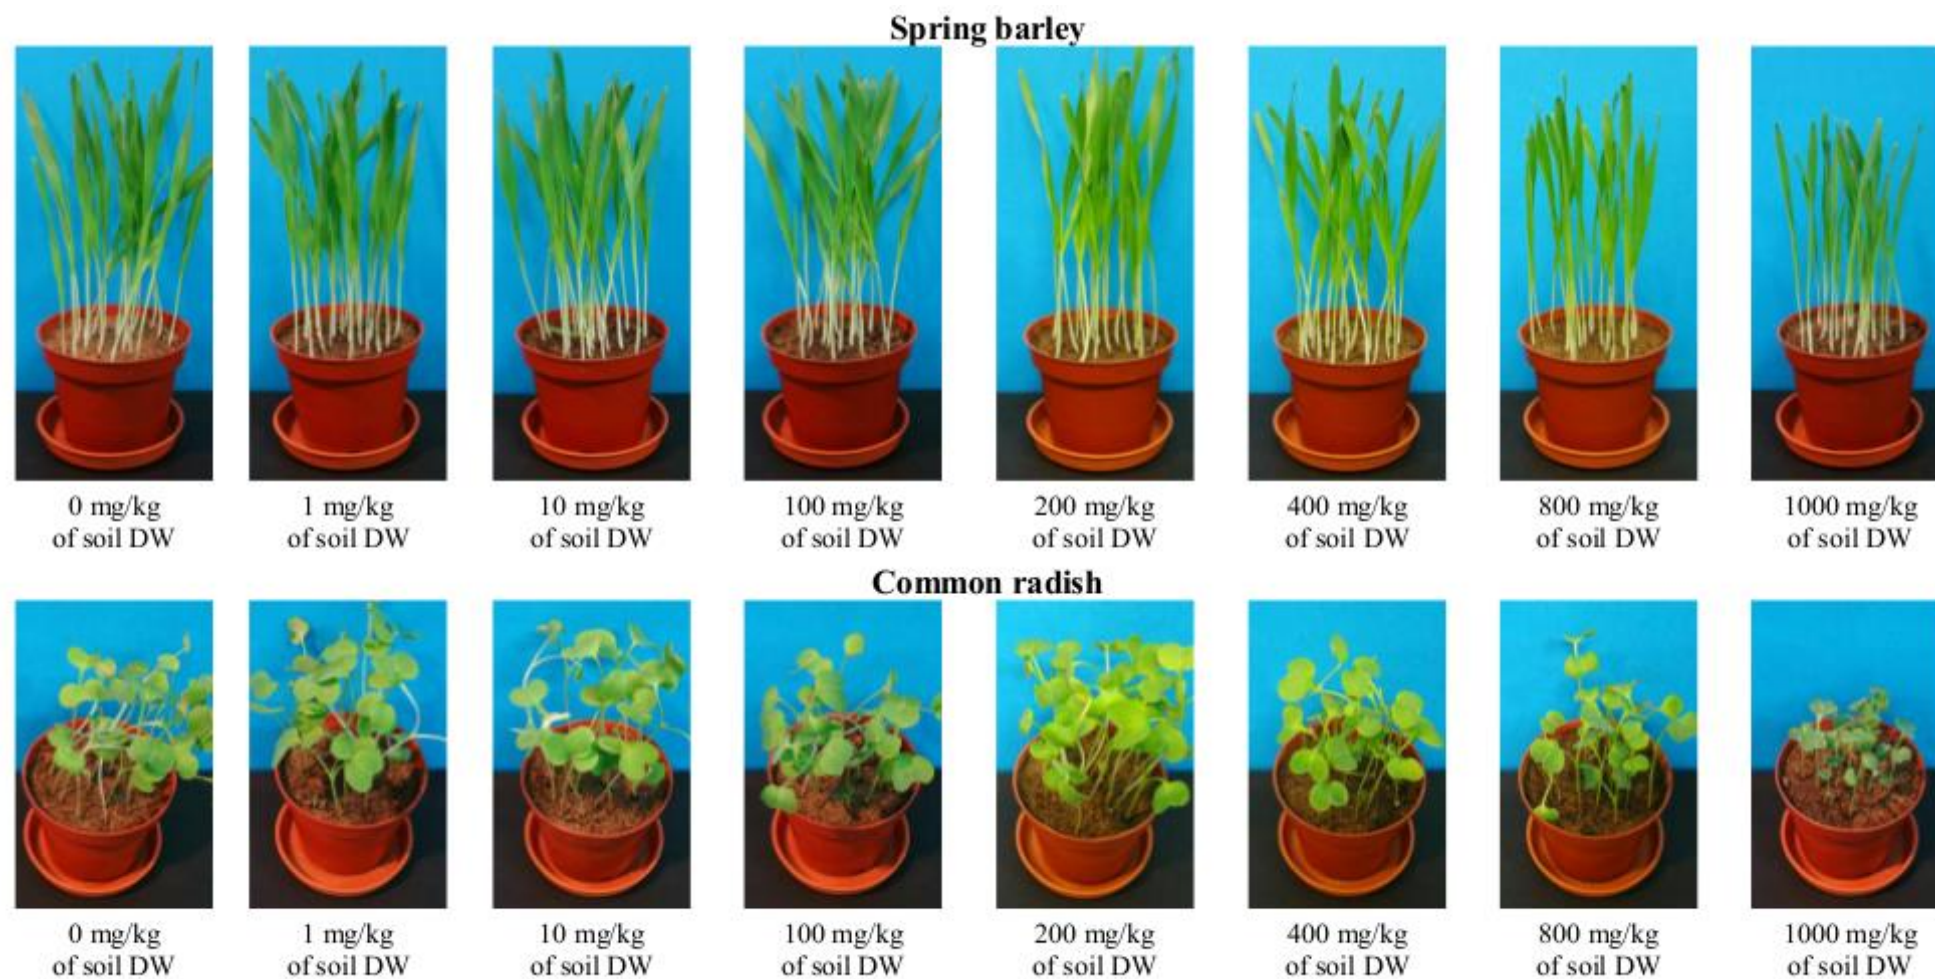

Figure S21. Digital photographs of plants seedlings in soil treated with aqueous solutions of *(R)*-DCA.

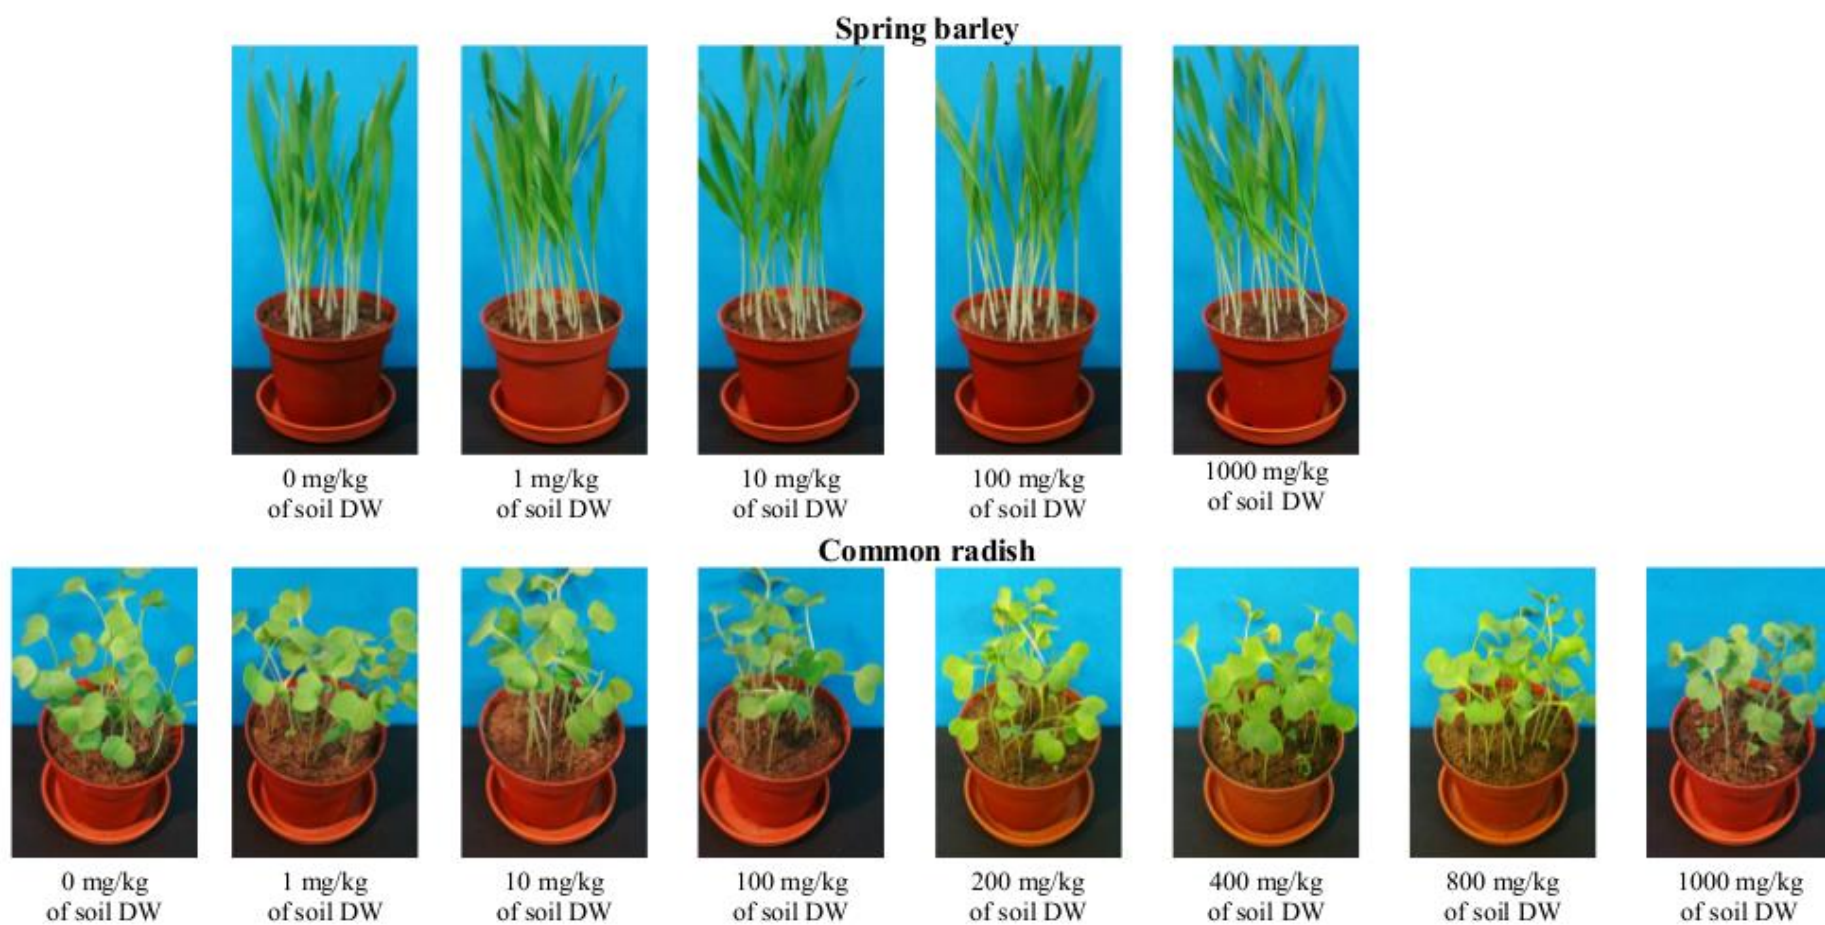

Figure S22. Digital photographs of plants seedlings in soil treated with aqueous solutions of *(S)*-DCA.



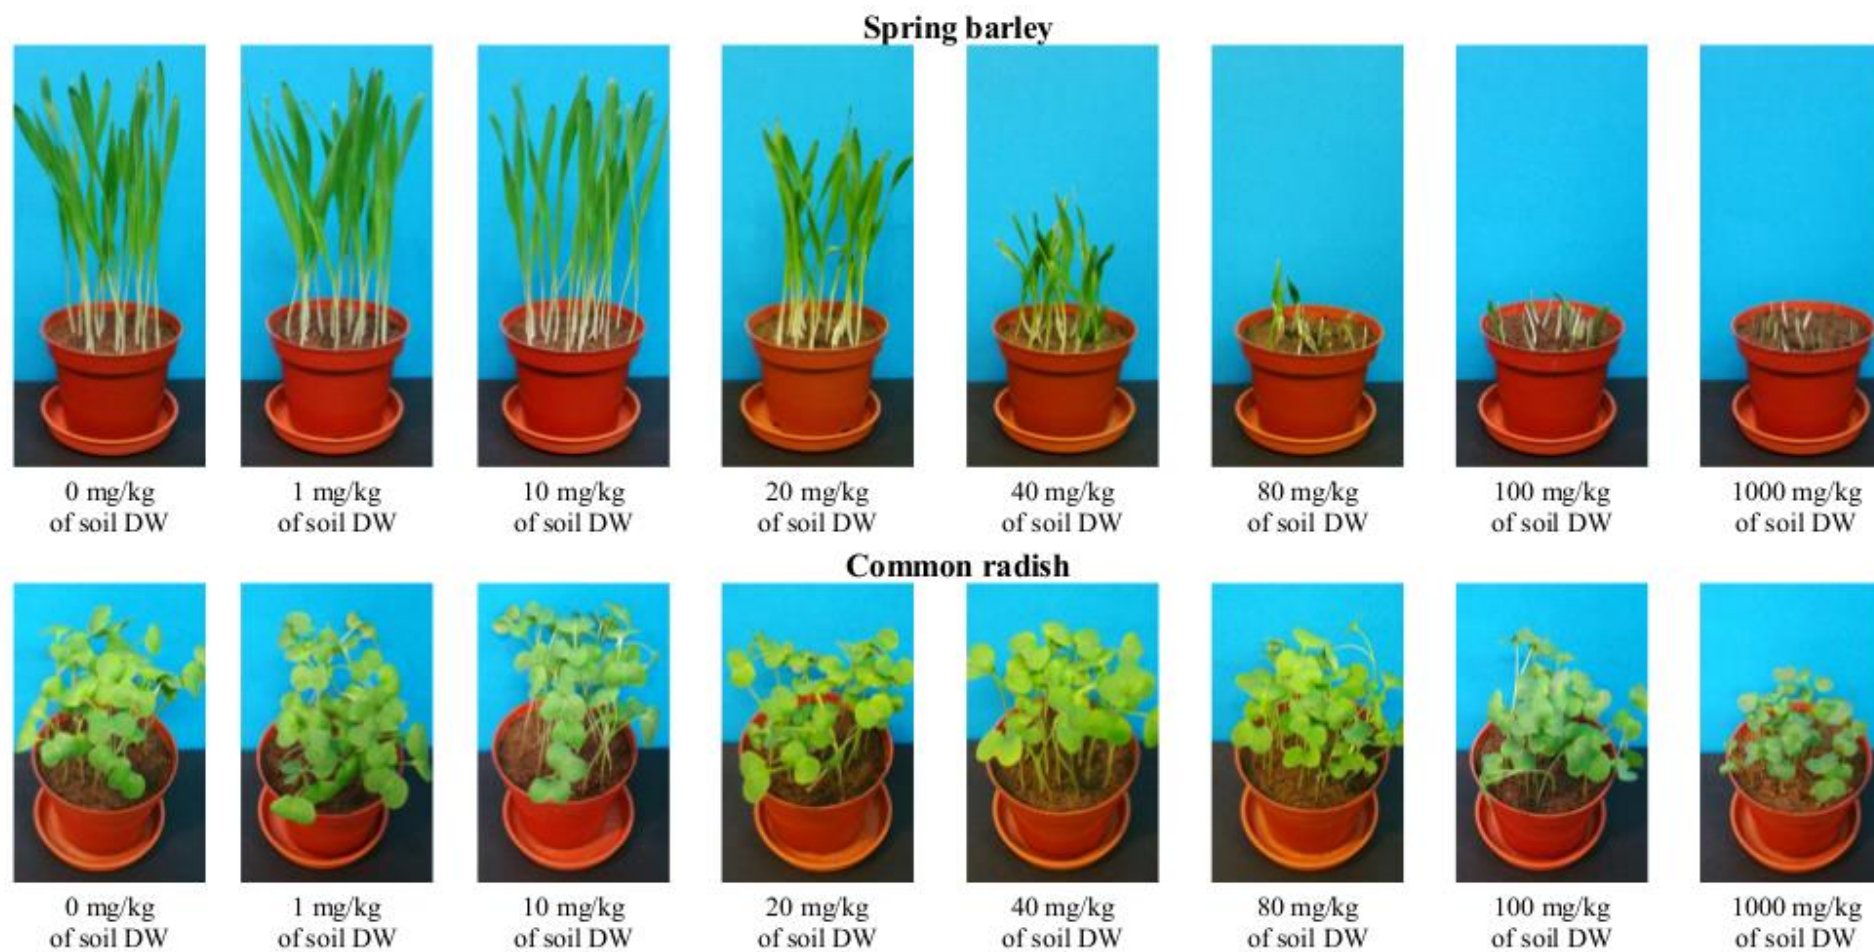

Figure S23. Digital photographs of plants seedlings in soil treated with aqueous solutions of *(R)*-TCA.



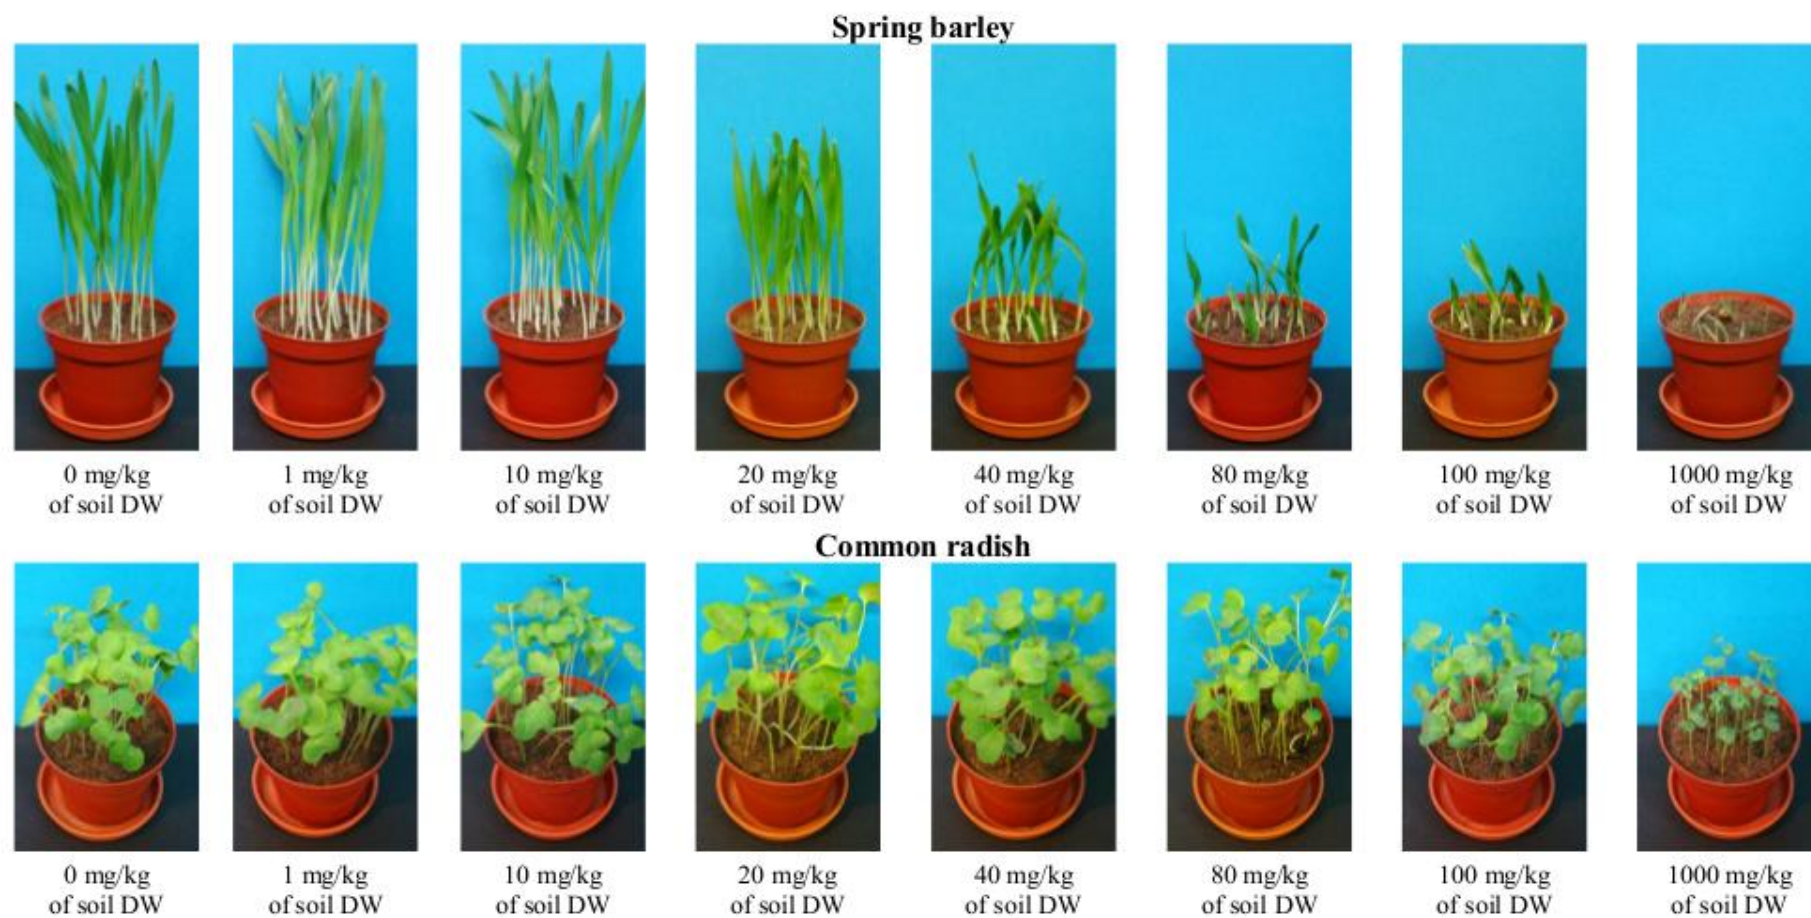

Figure S24. Digital photographs of plants seedlings in soil treated with aqueous solutions of *(S)*-TCA.

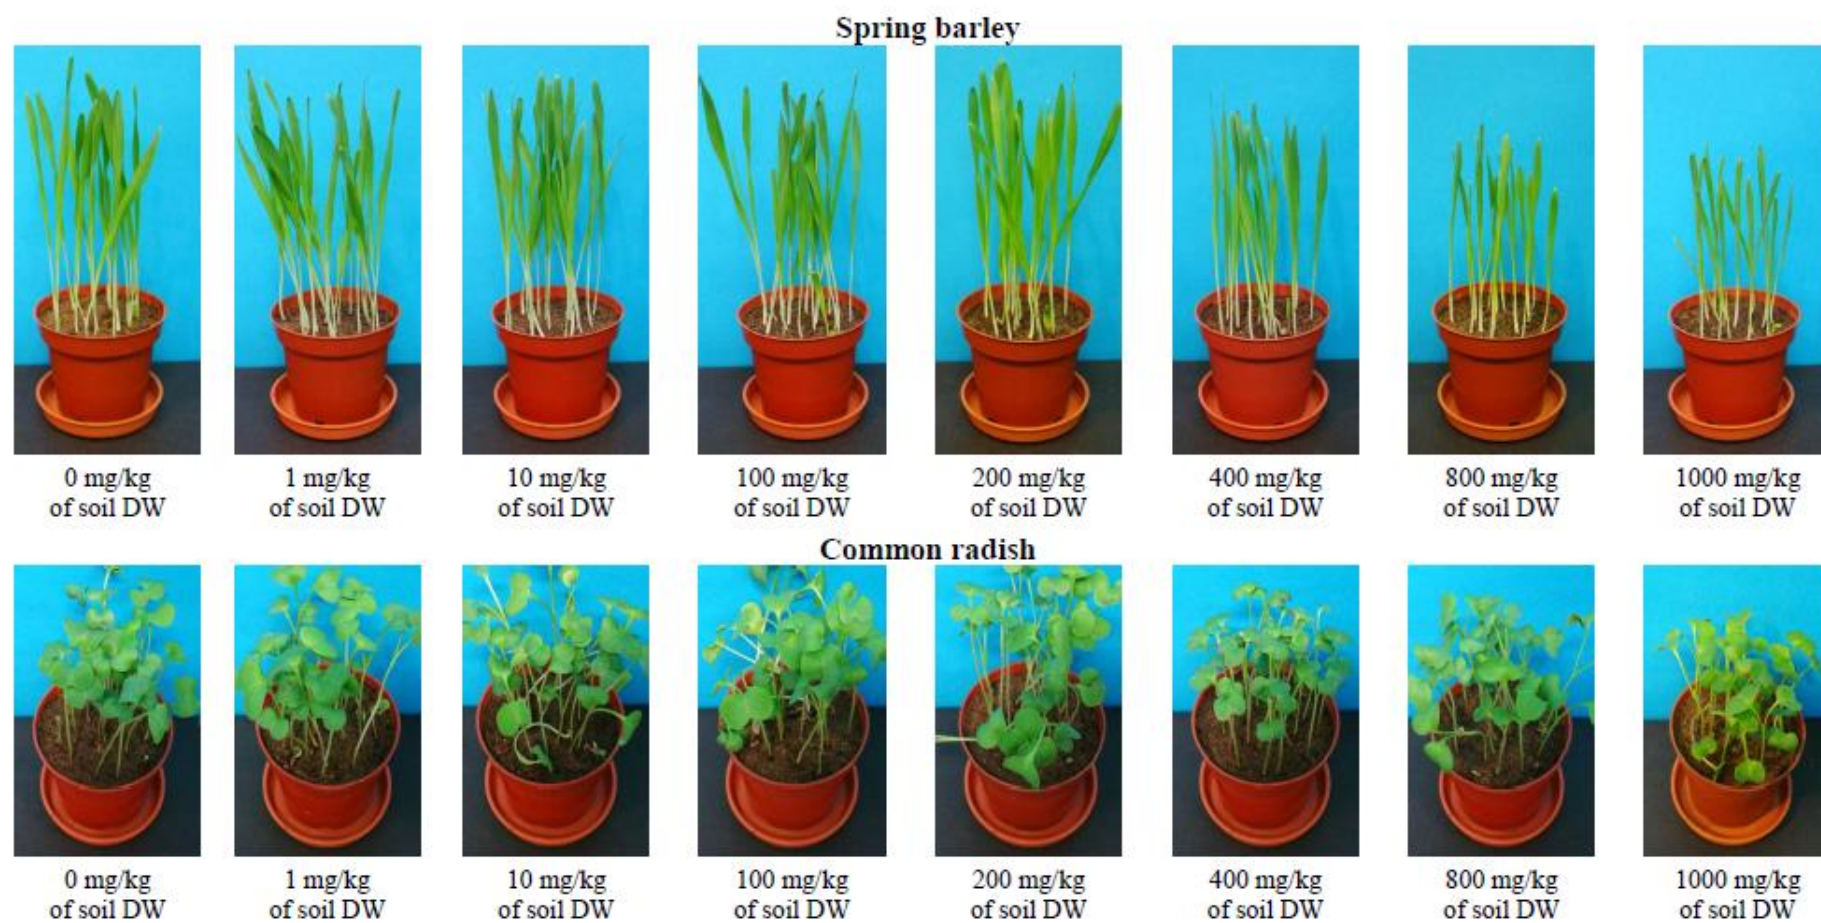

Figure S25. Digital photographs of plants seedlings in soil treated with aqueous solutions of *(R)*-SO<sub>4</sub>.



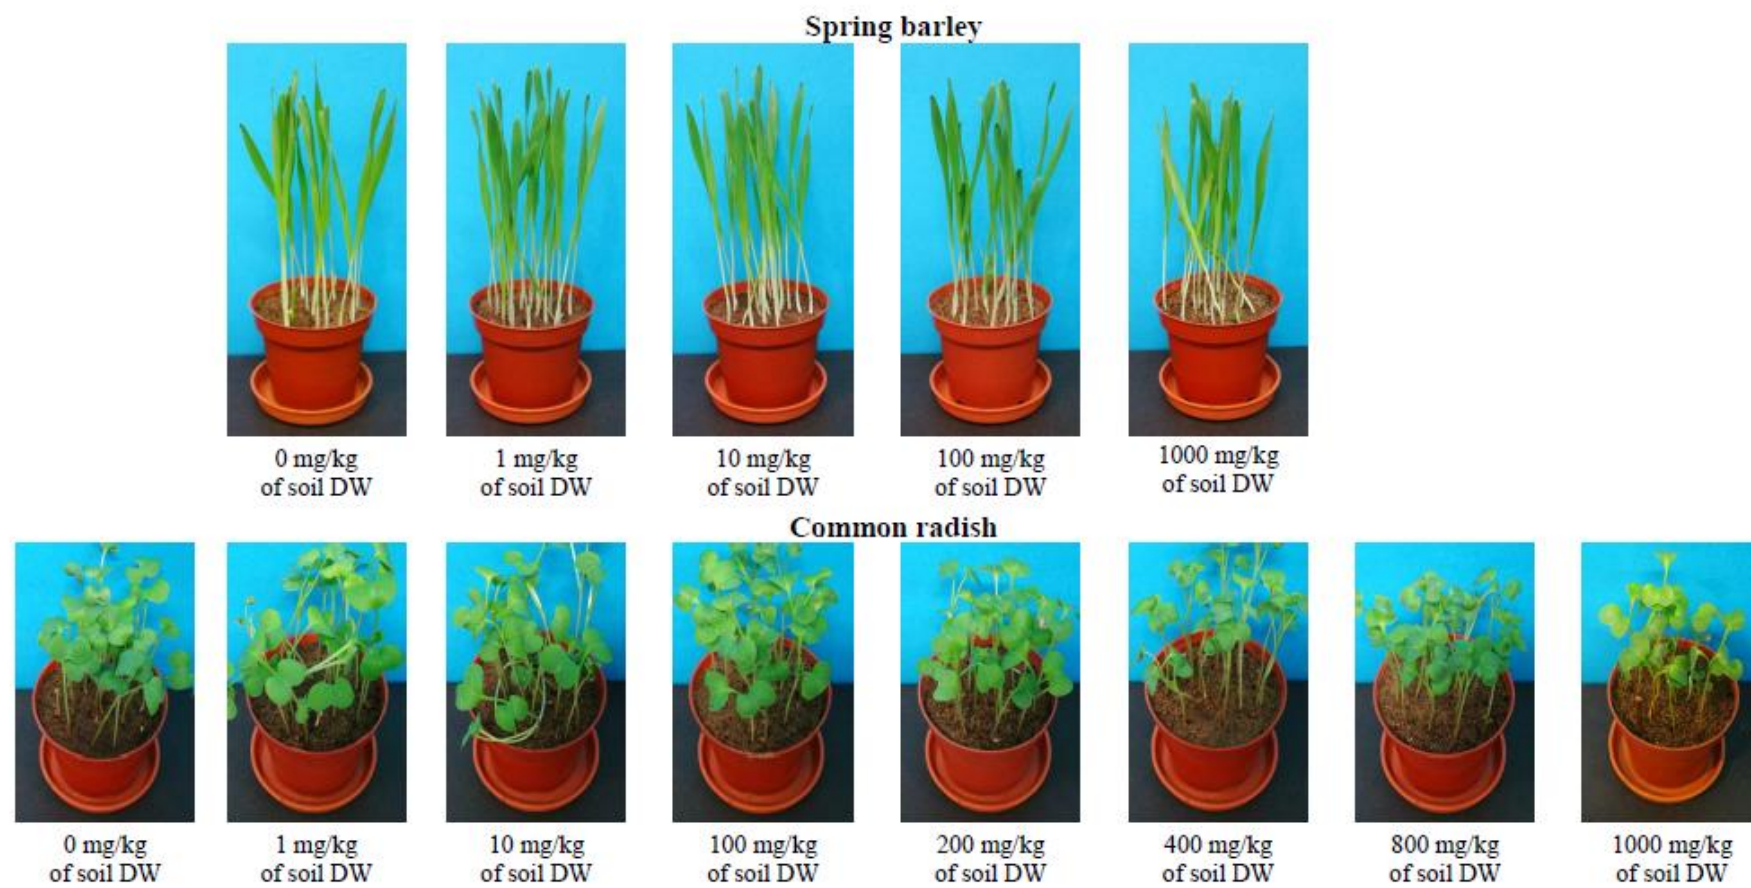

Figure S26. Digital photographs of plants seedlings in soil treated with aqueous solutions of *(S)*-SO<sub>4</sub>.

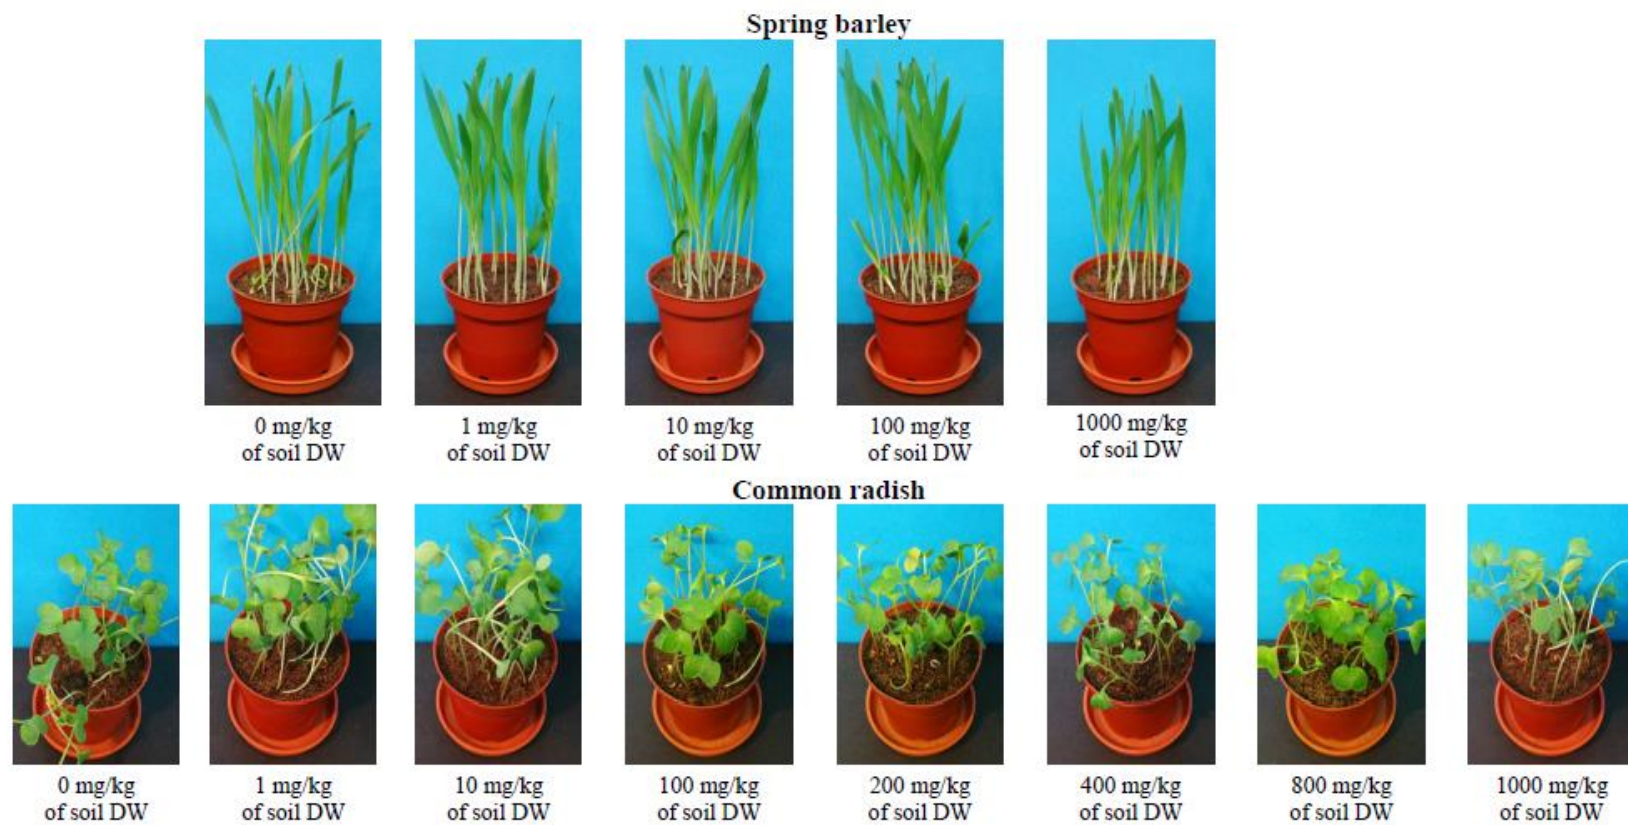

Figure S27. Digital photographs of plants seedlings in soil treated with aqueous solutions of *DIPA-SO<sub>4</sub>*.

#### **4. Herbicidal activity**

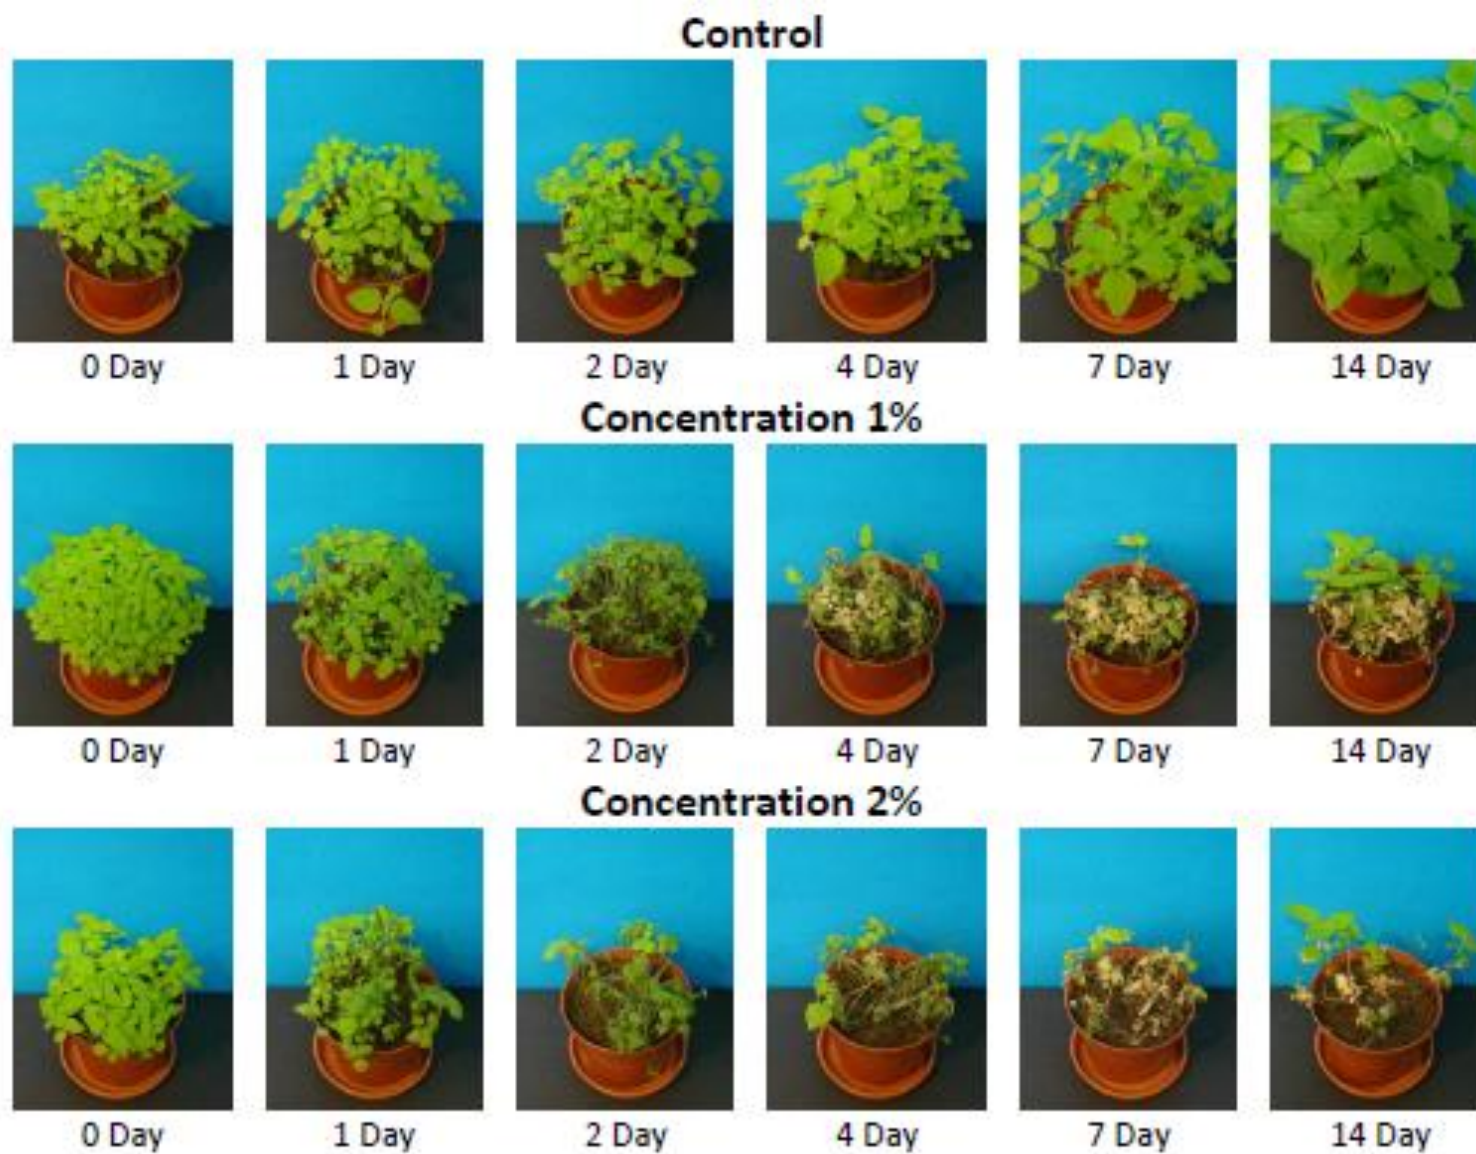

Figure S28. Digital photographs of gallant soldier after the spraying of 1% and 2% aqueous solutions of (*R*)-MCA.



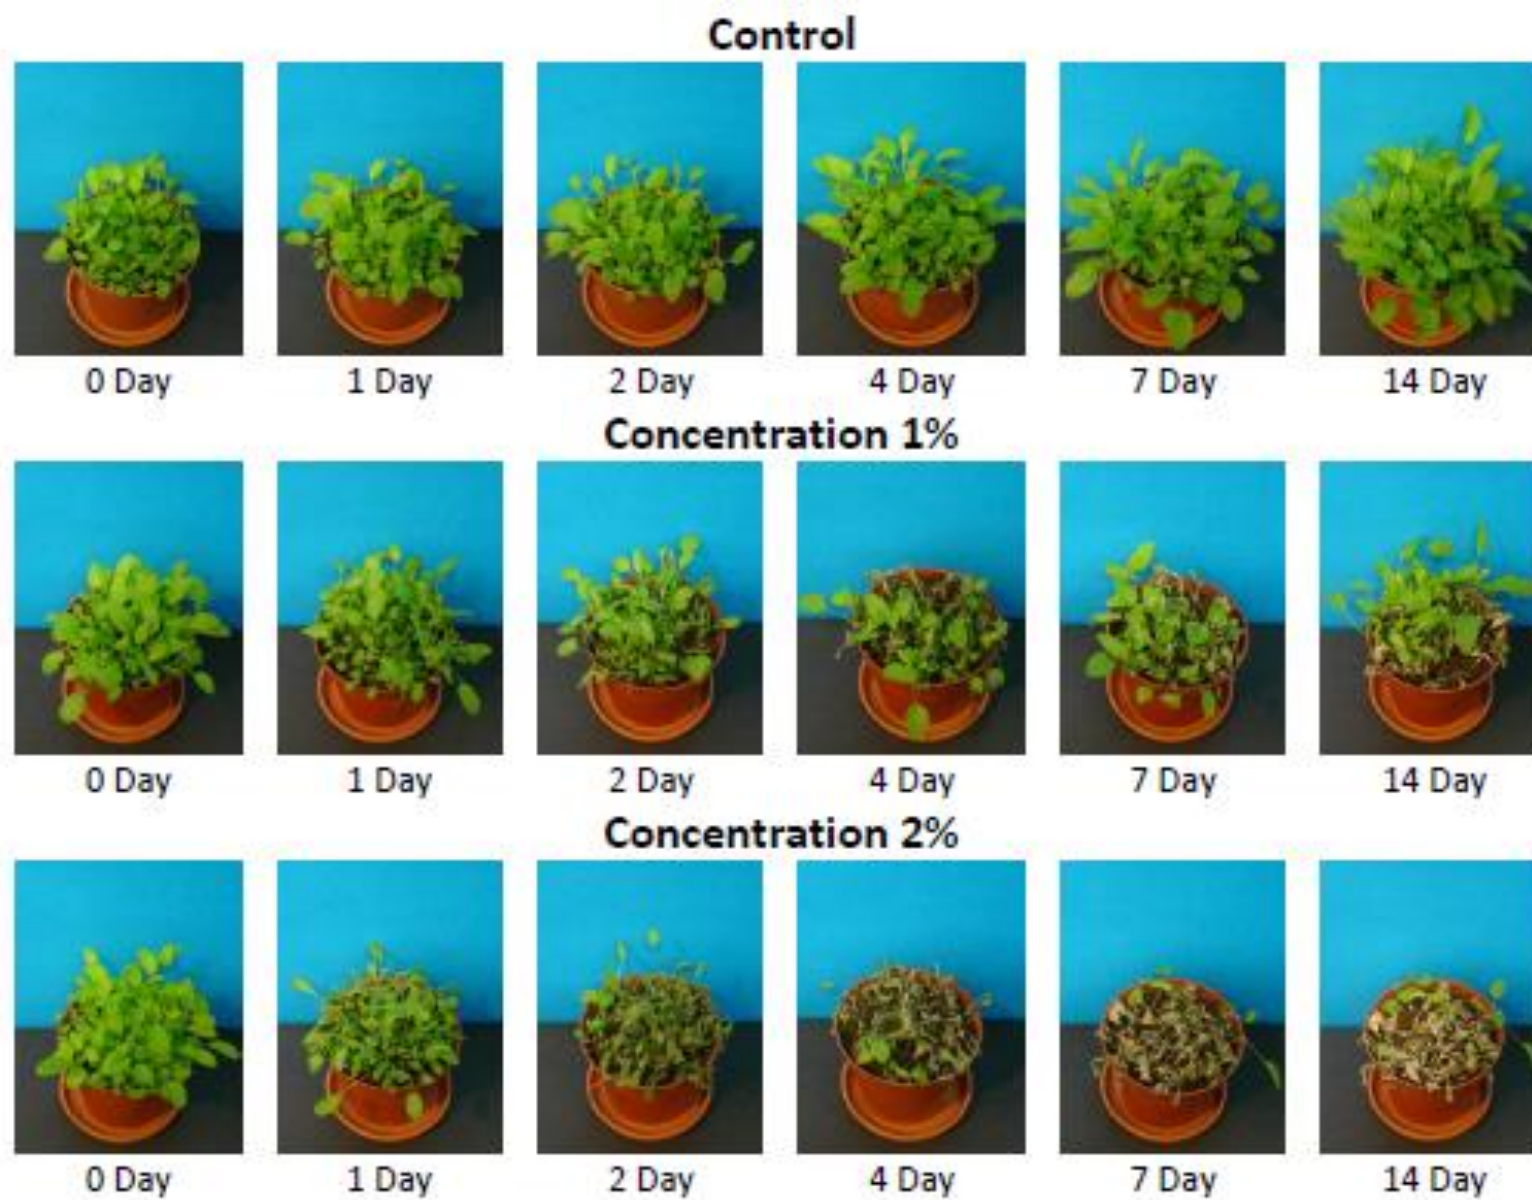

Figure S29. Digital photographs of common sorrel after the spraying of 1% and 2% aqueous solutions of (*R*)-MCA.

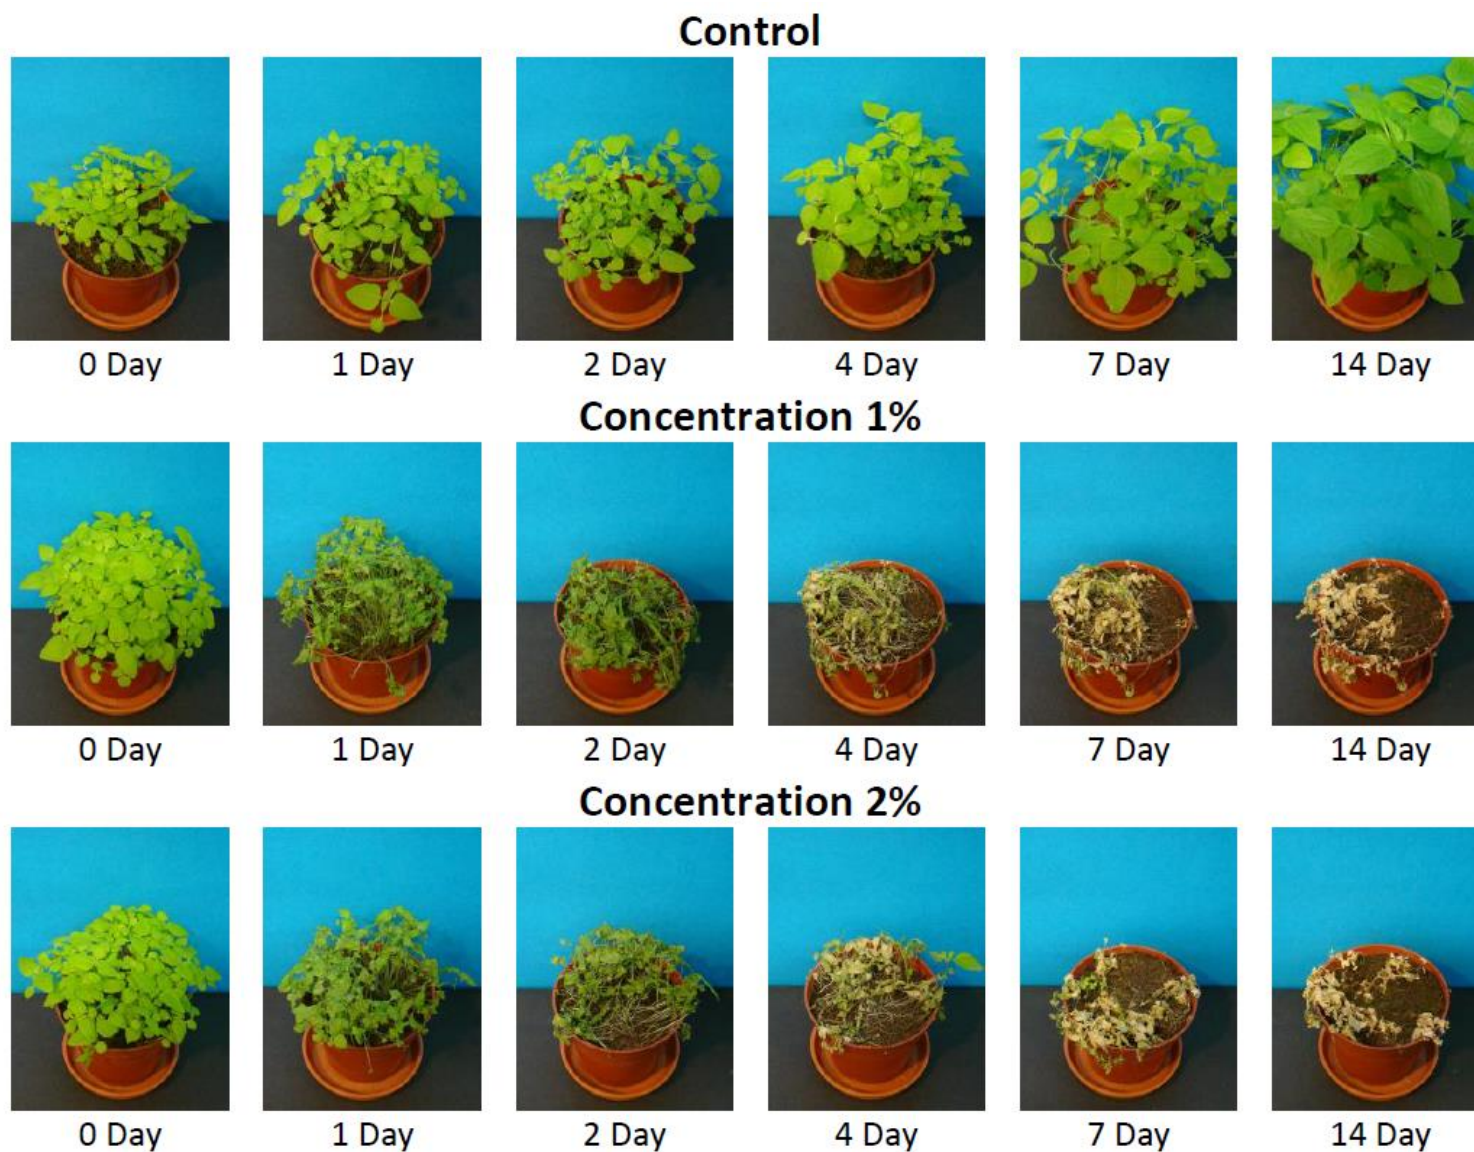

Figure S30. Digital photographs of gallant soldier after the spraying of 1% and 2% aqueous solutions of **(S)-MCA**.



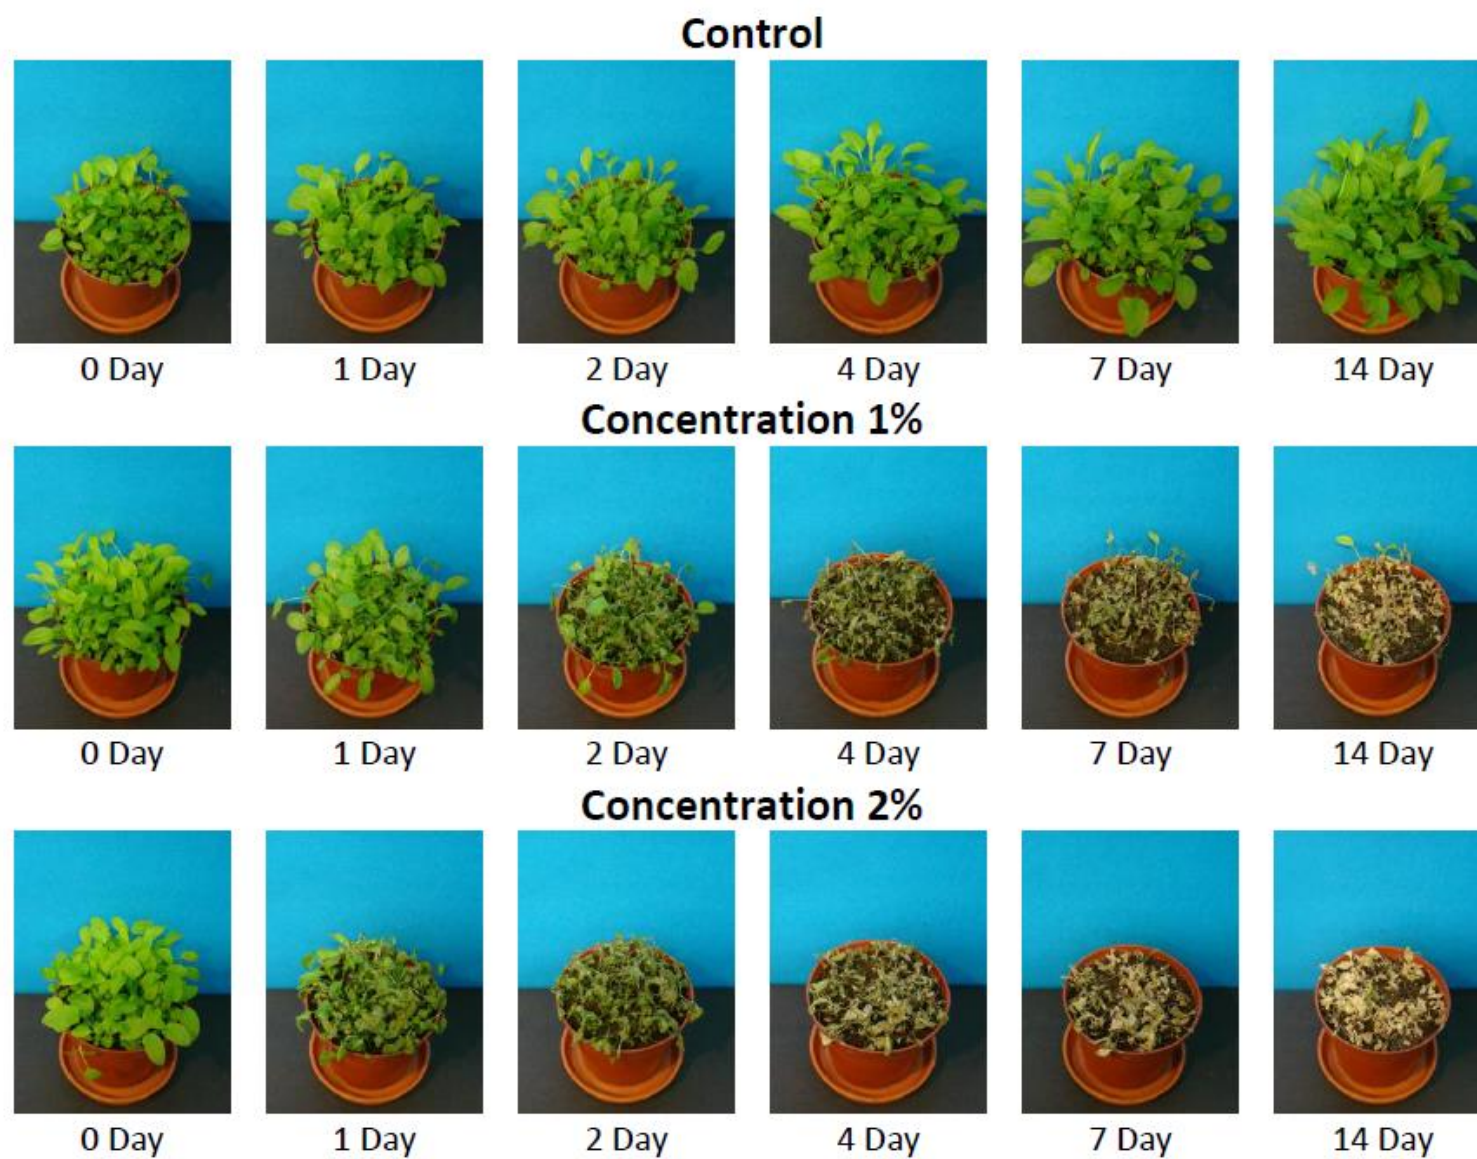

Figure S31. Digital photographs of common sorrel after the spraying of 1% and 2% aqueous solutions of (*S*)-MCA.

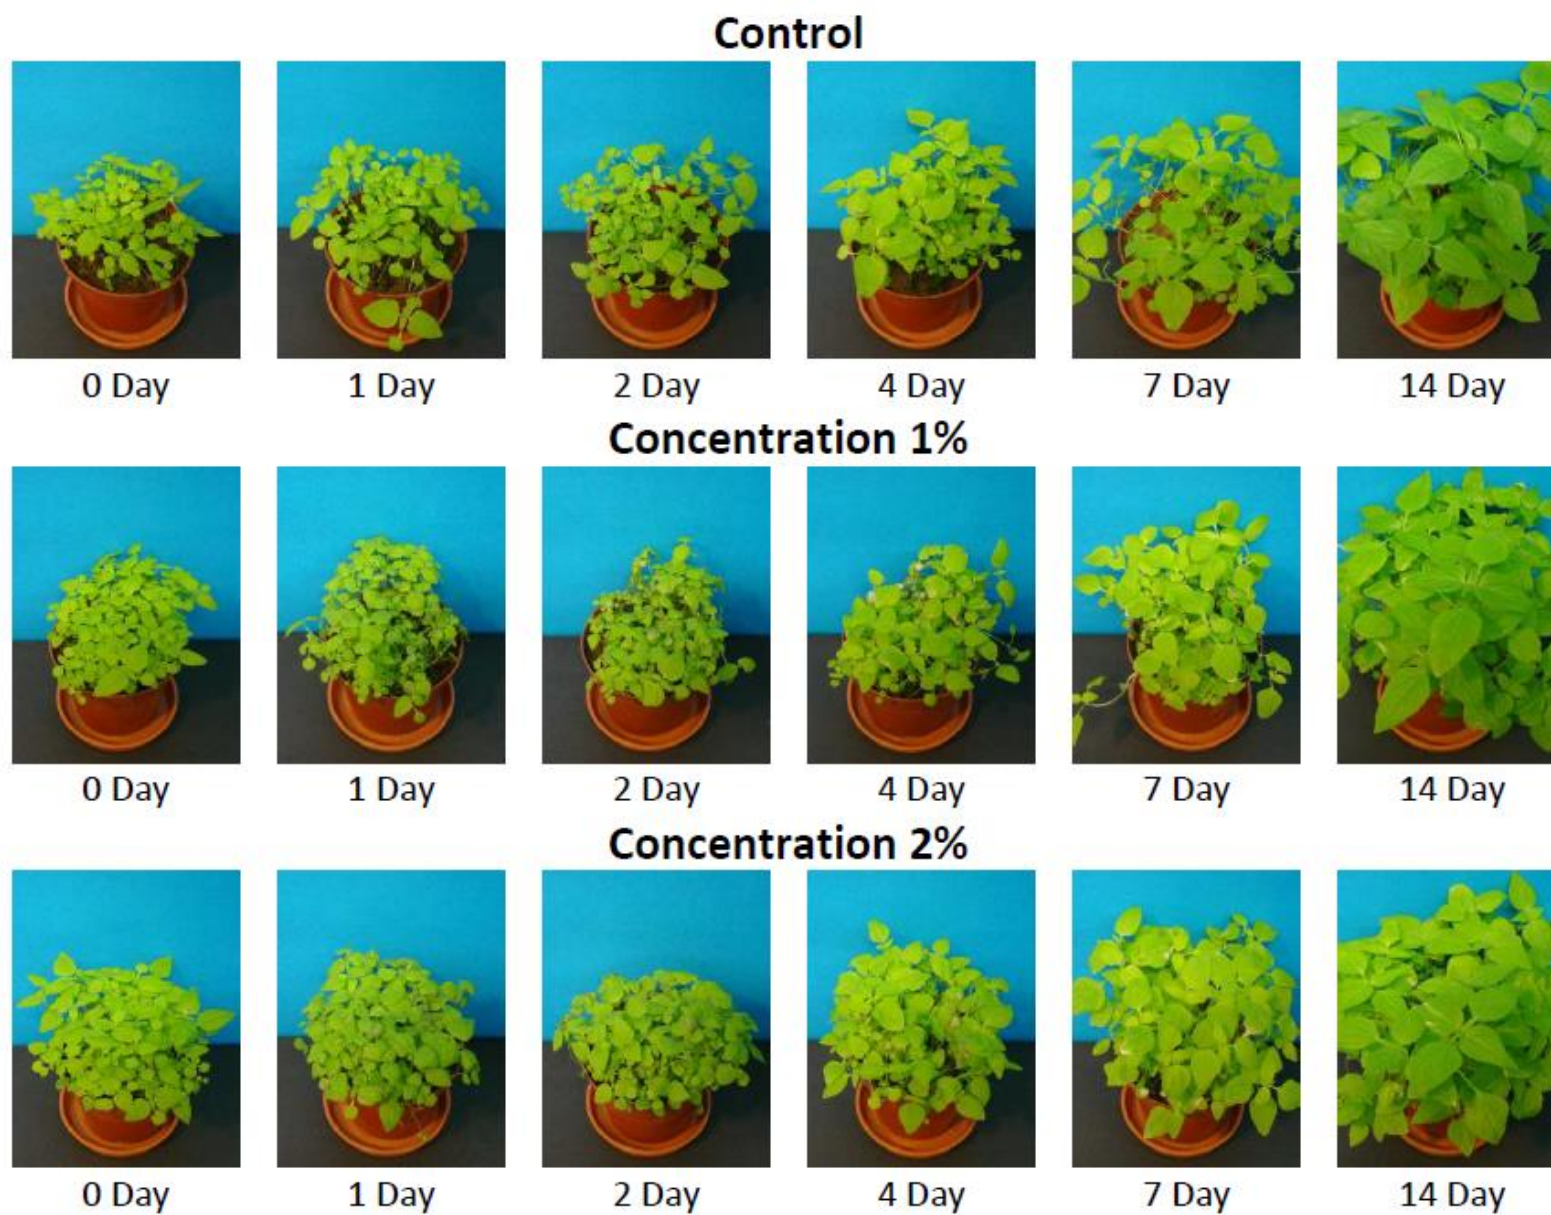

Figure S32. Digital photographs of gallant soldier after the spraying of 1% and 2% aqueous solutions of (*R*)-DCA.



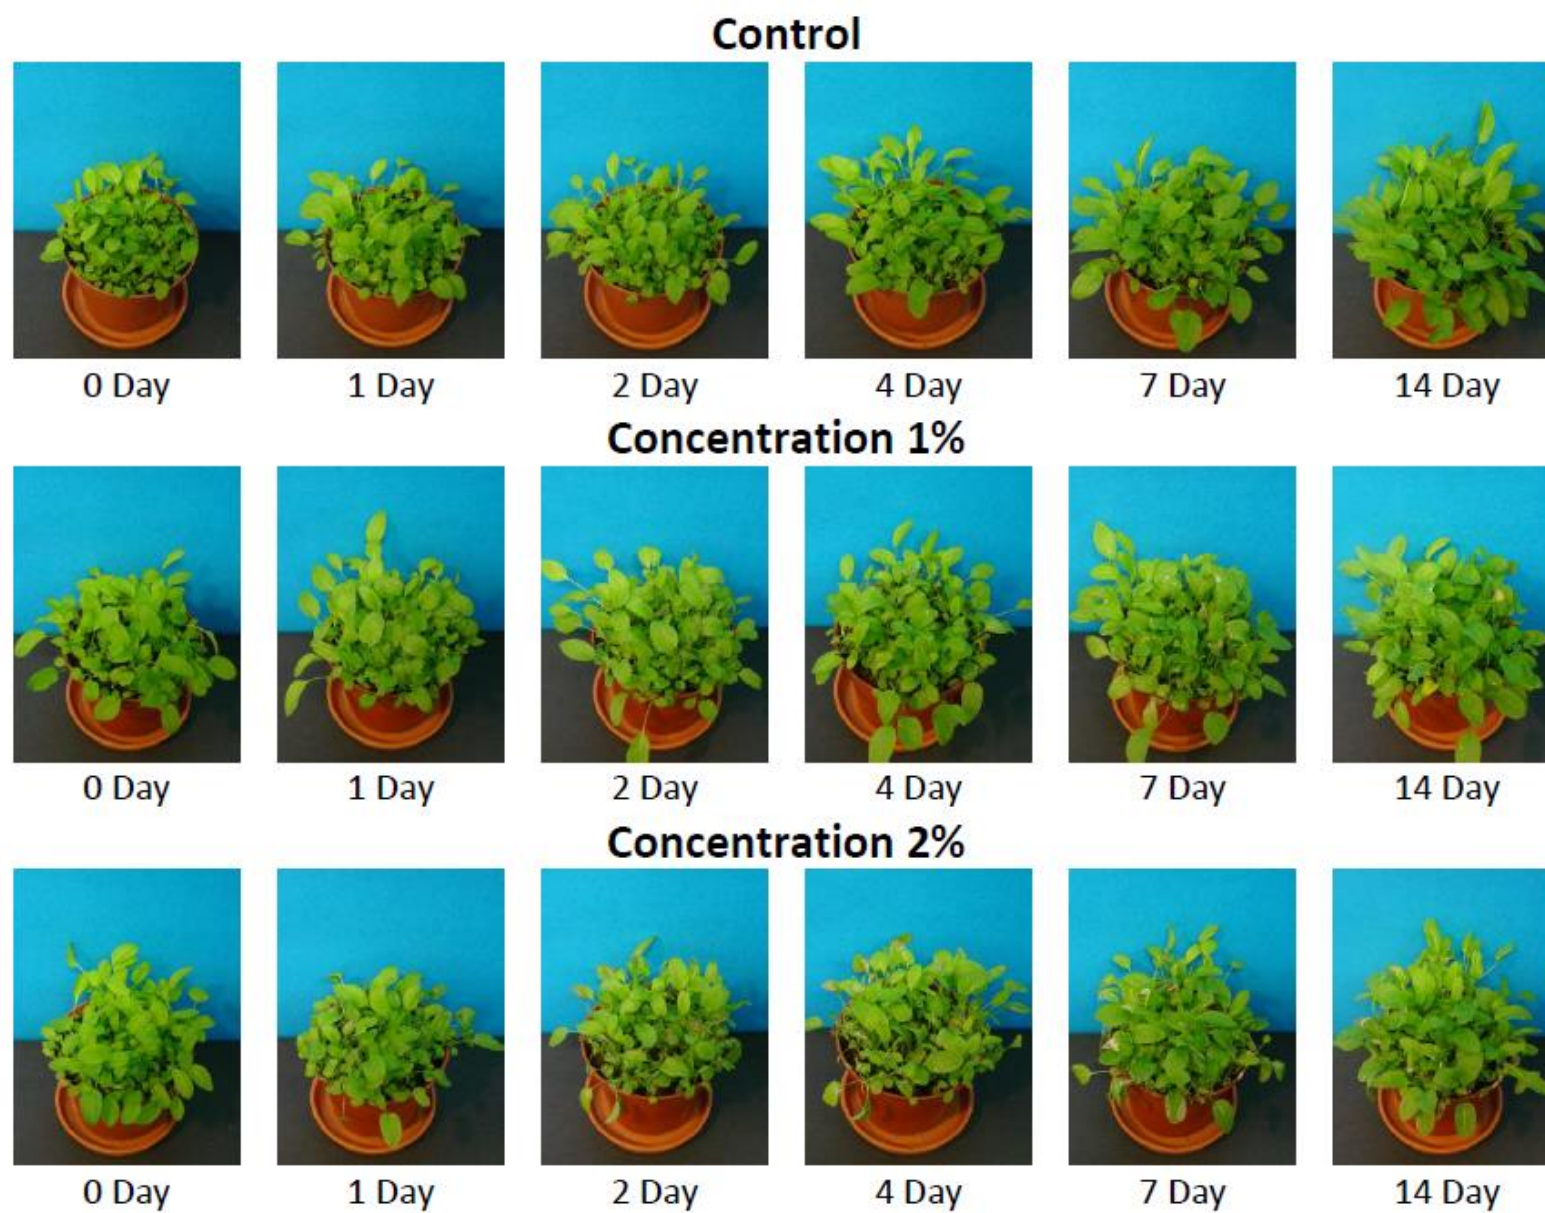

Figure S33. Digital photographs of common sorrel after the spraying of 1% and 2% aqueous solutions of (*R*)-DCA.

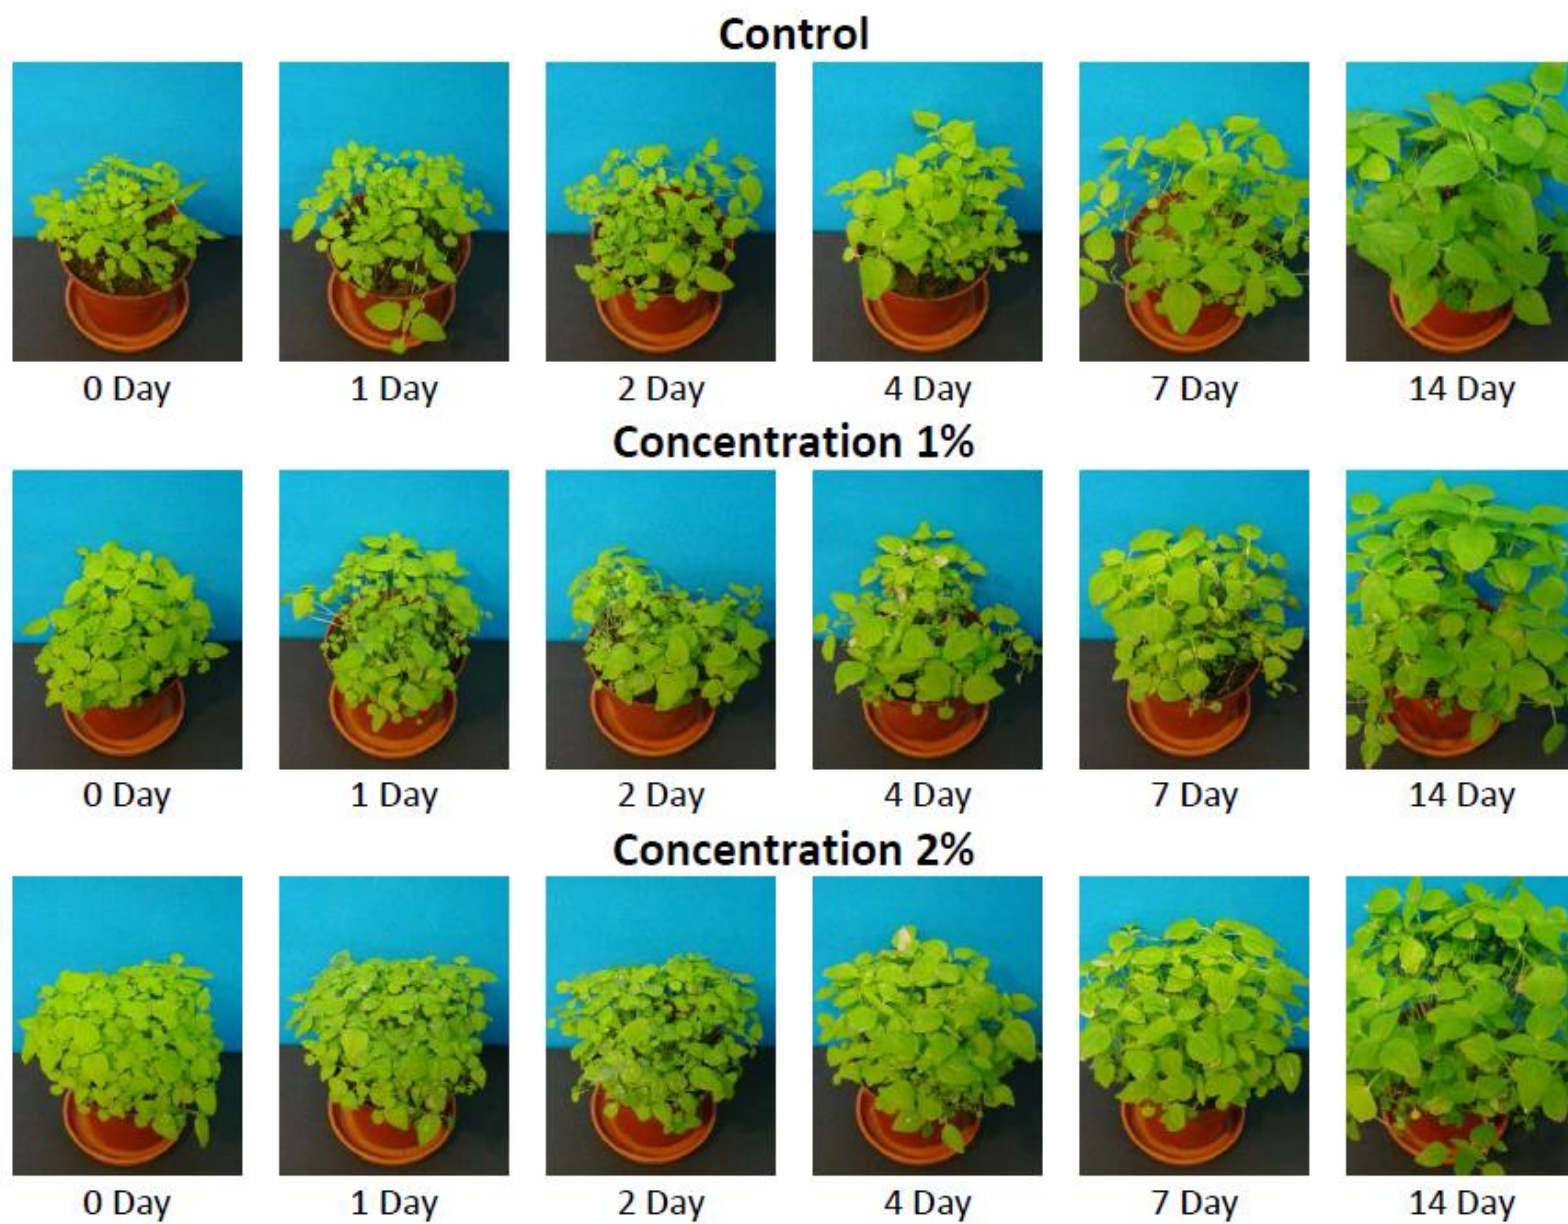

Figure S34. Digital photographs of gallant soldier after the spraying of 1% and 2% aqueous solutions of *(S)*-DCA.



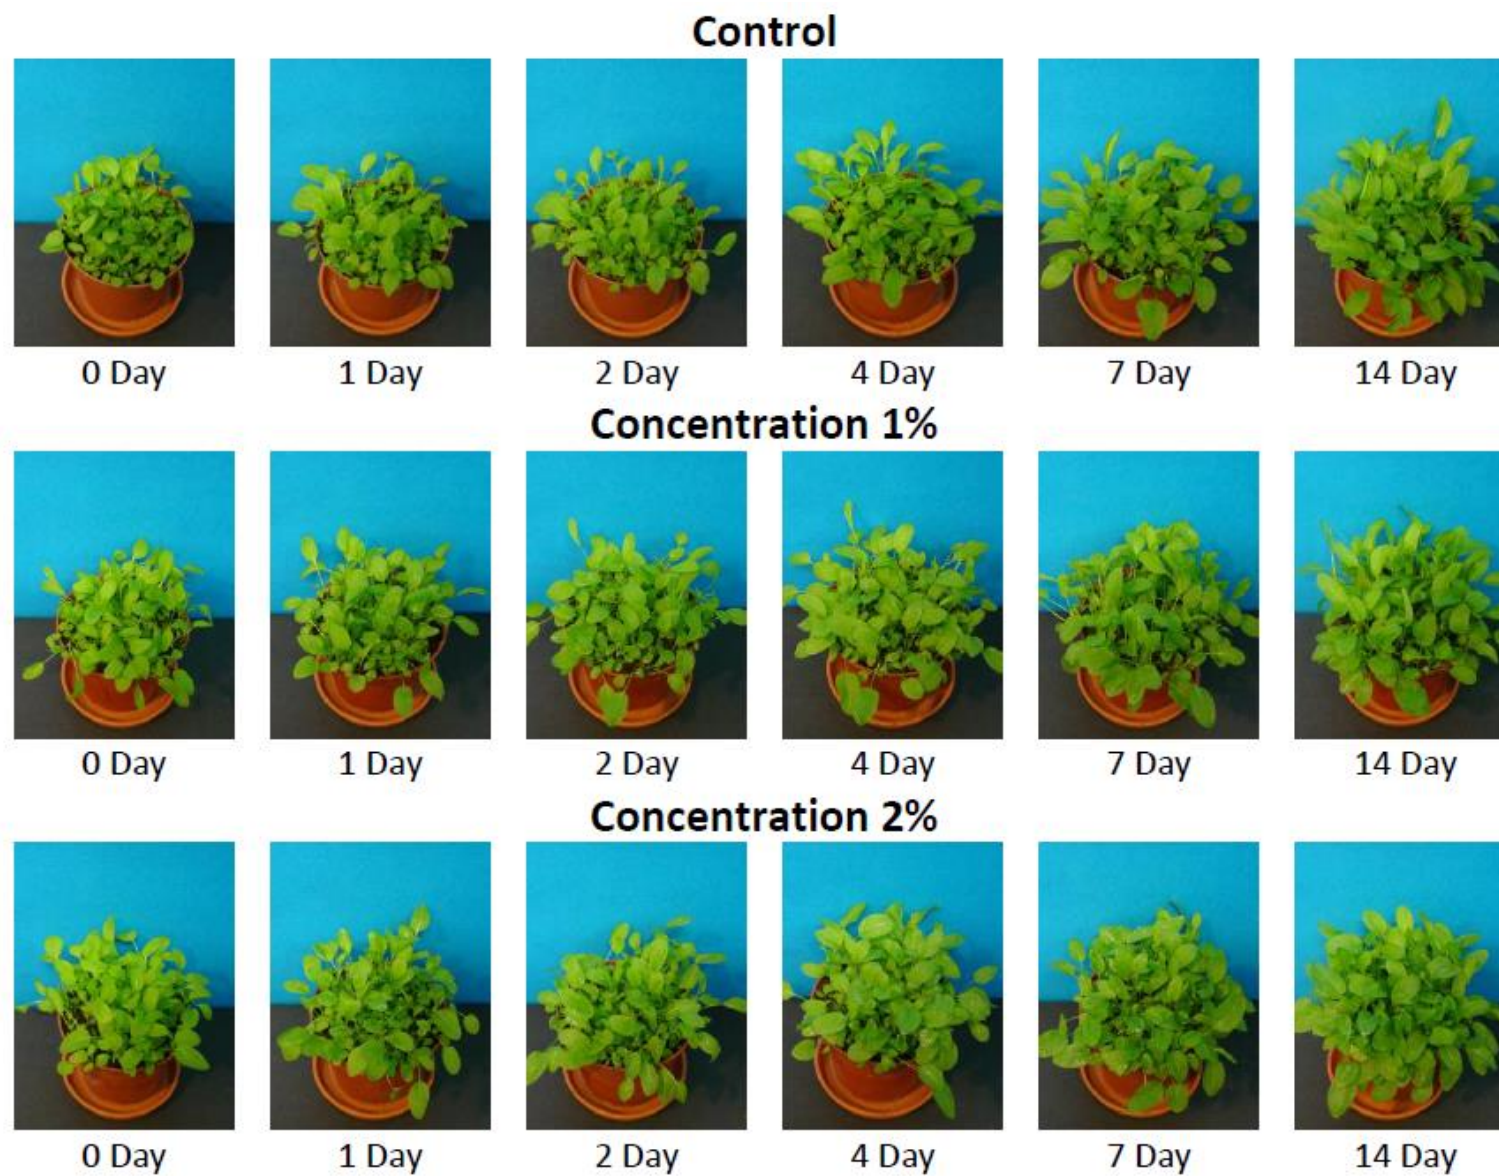

Figure S35. Digital photographs of common sorrel after the spraying of 1% and 2% aqueous solutions of (*S*)-DCA.

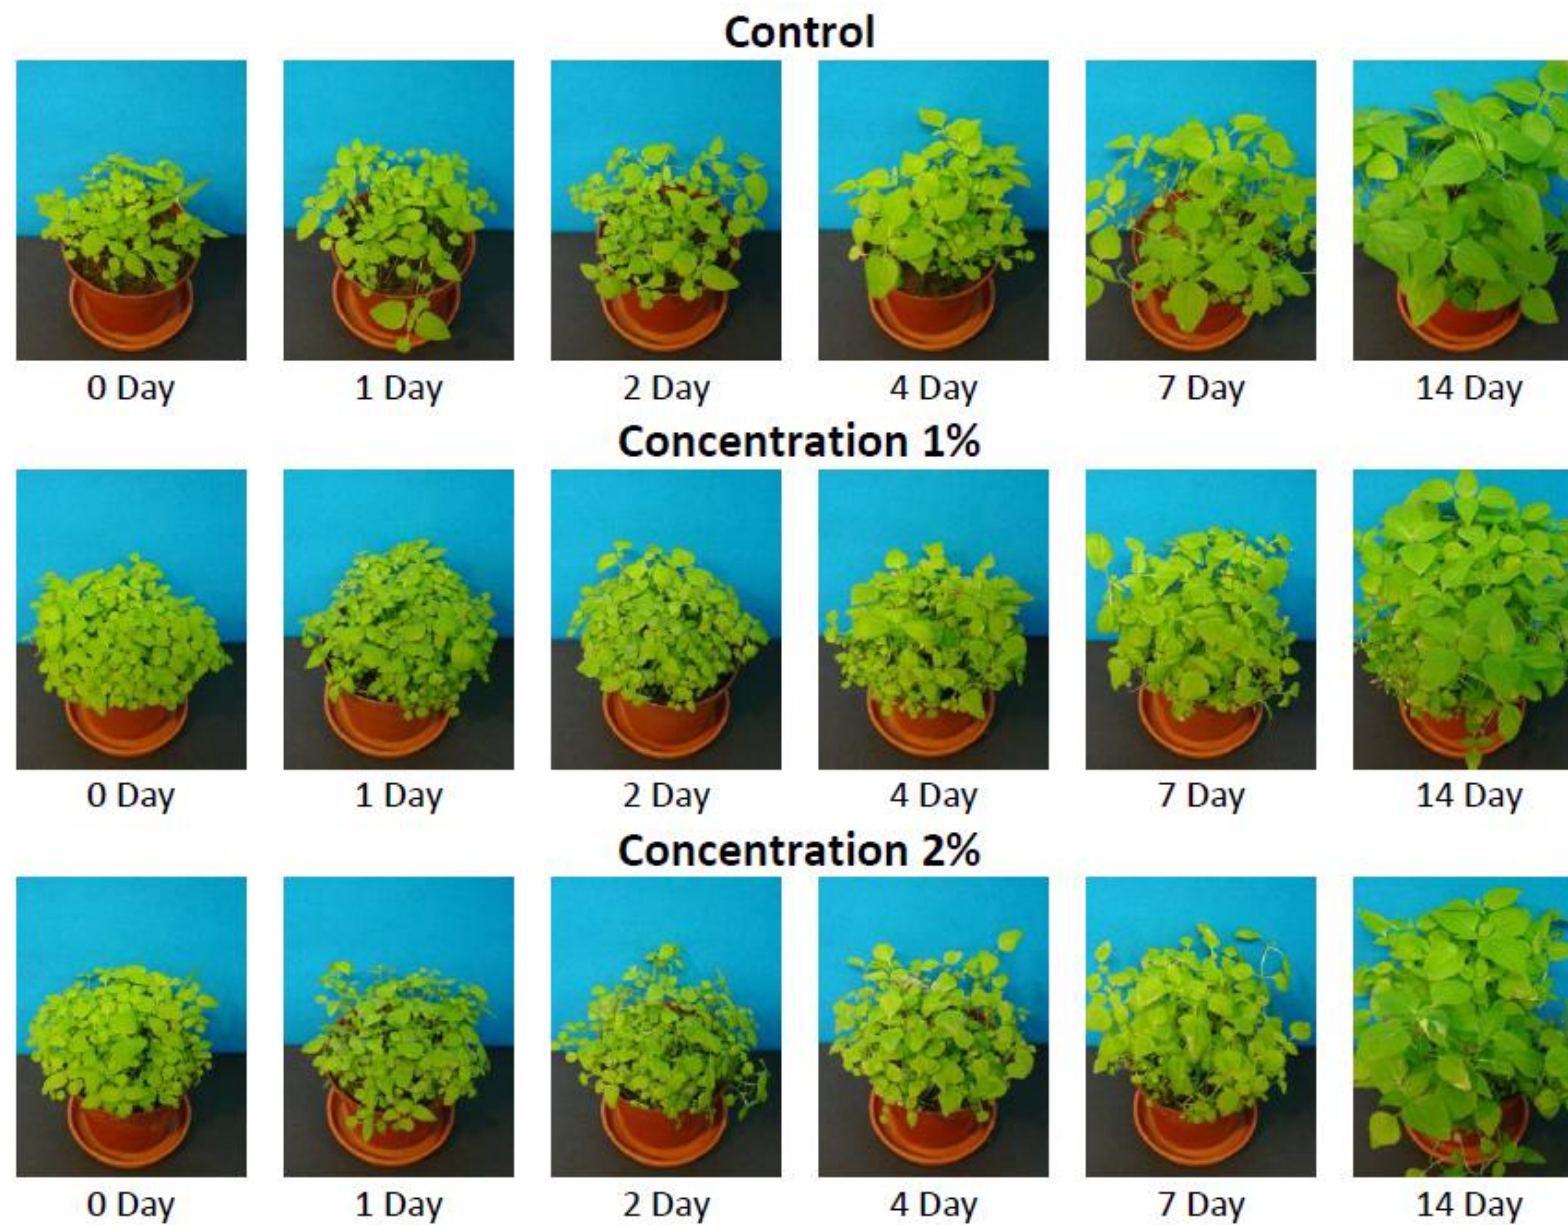

Figure S36. Digital photographs of gallant soldier after the spraying of 1% and 2% aqueous solutions of (*R*)-TCA.



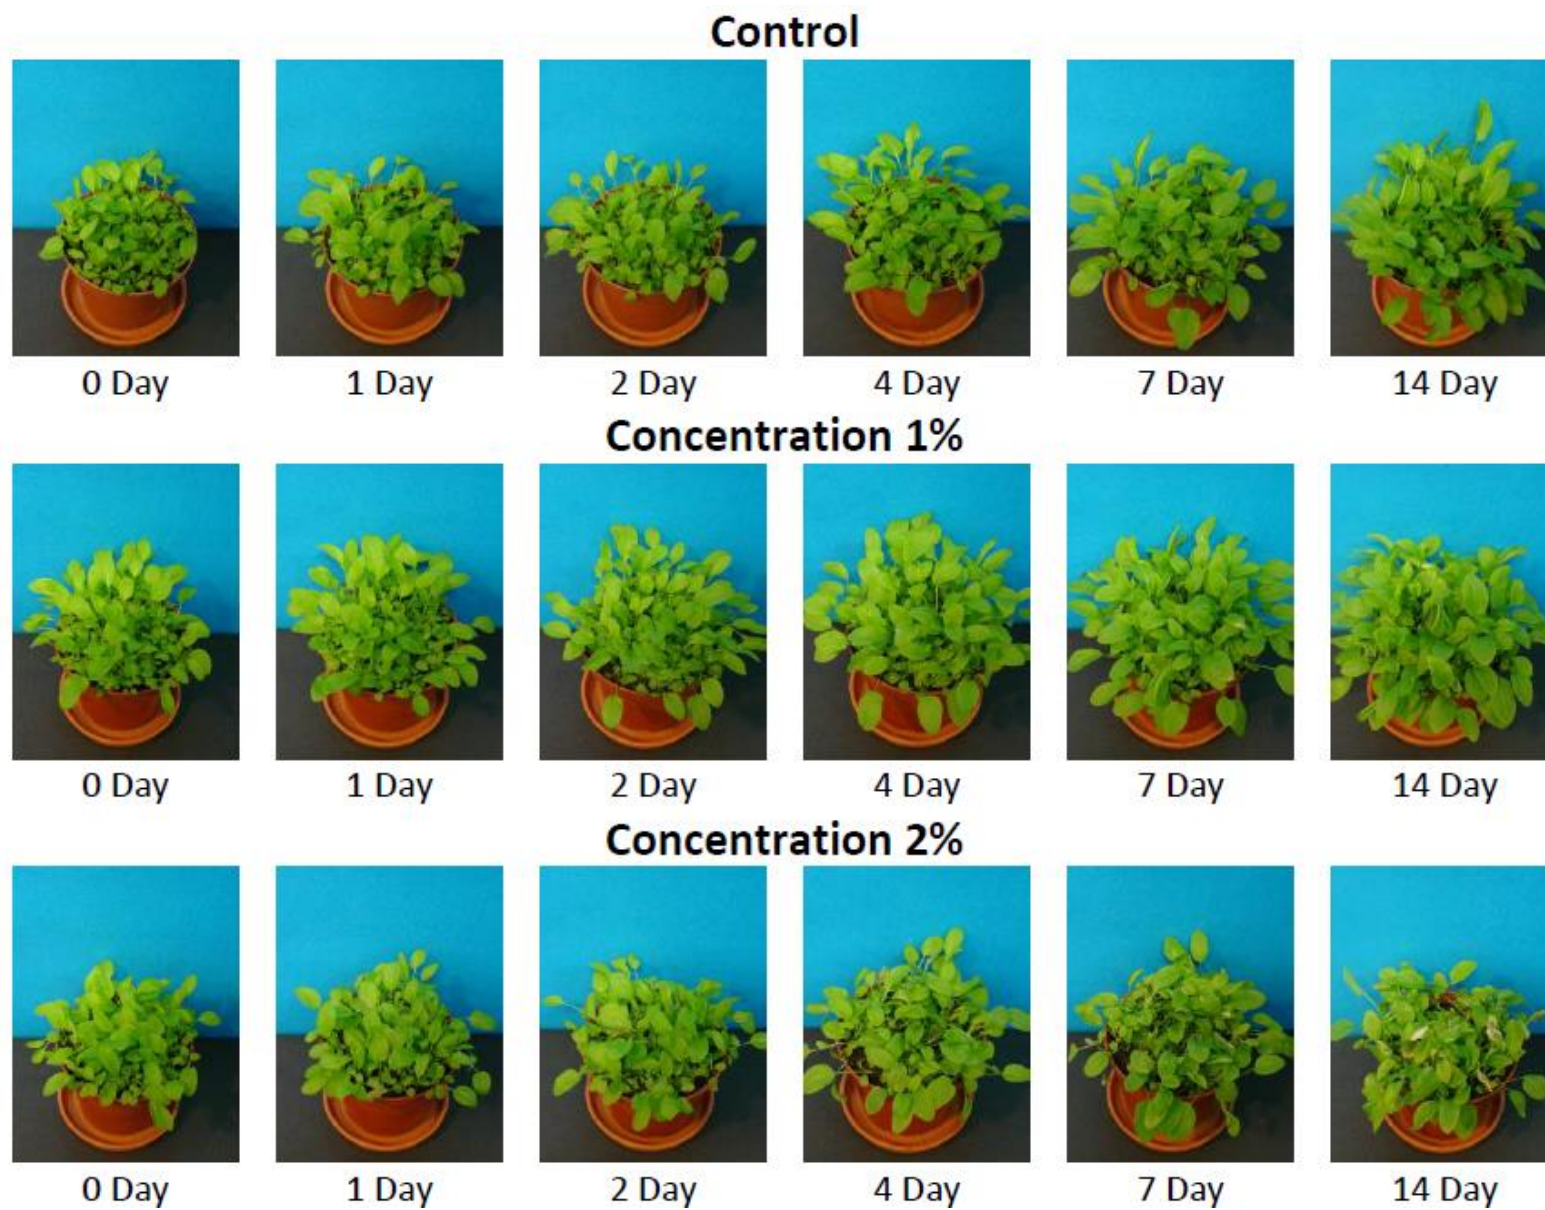

Figure S37. Digital photographs of common sorrel after the spraying of 1% and 2% aqueous solutions of (*R*)-TCA.

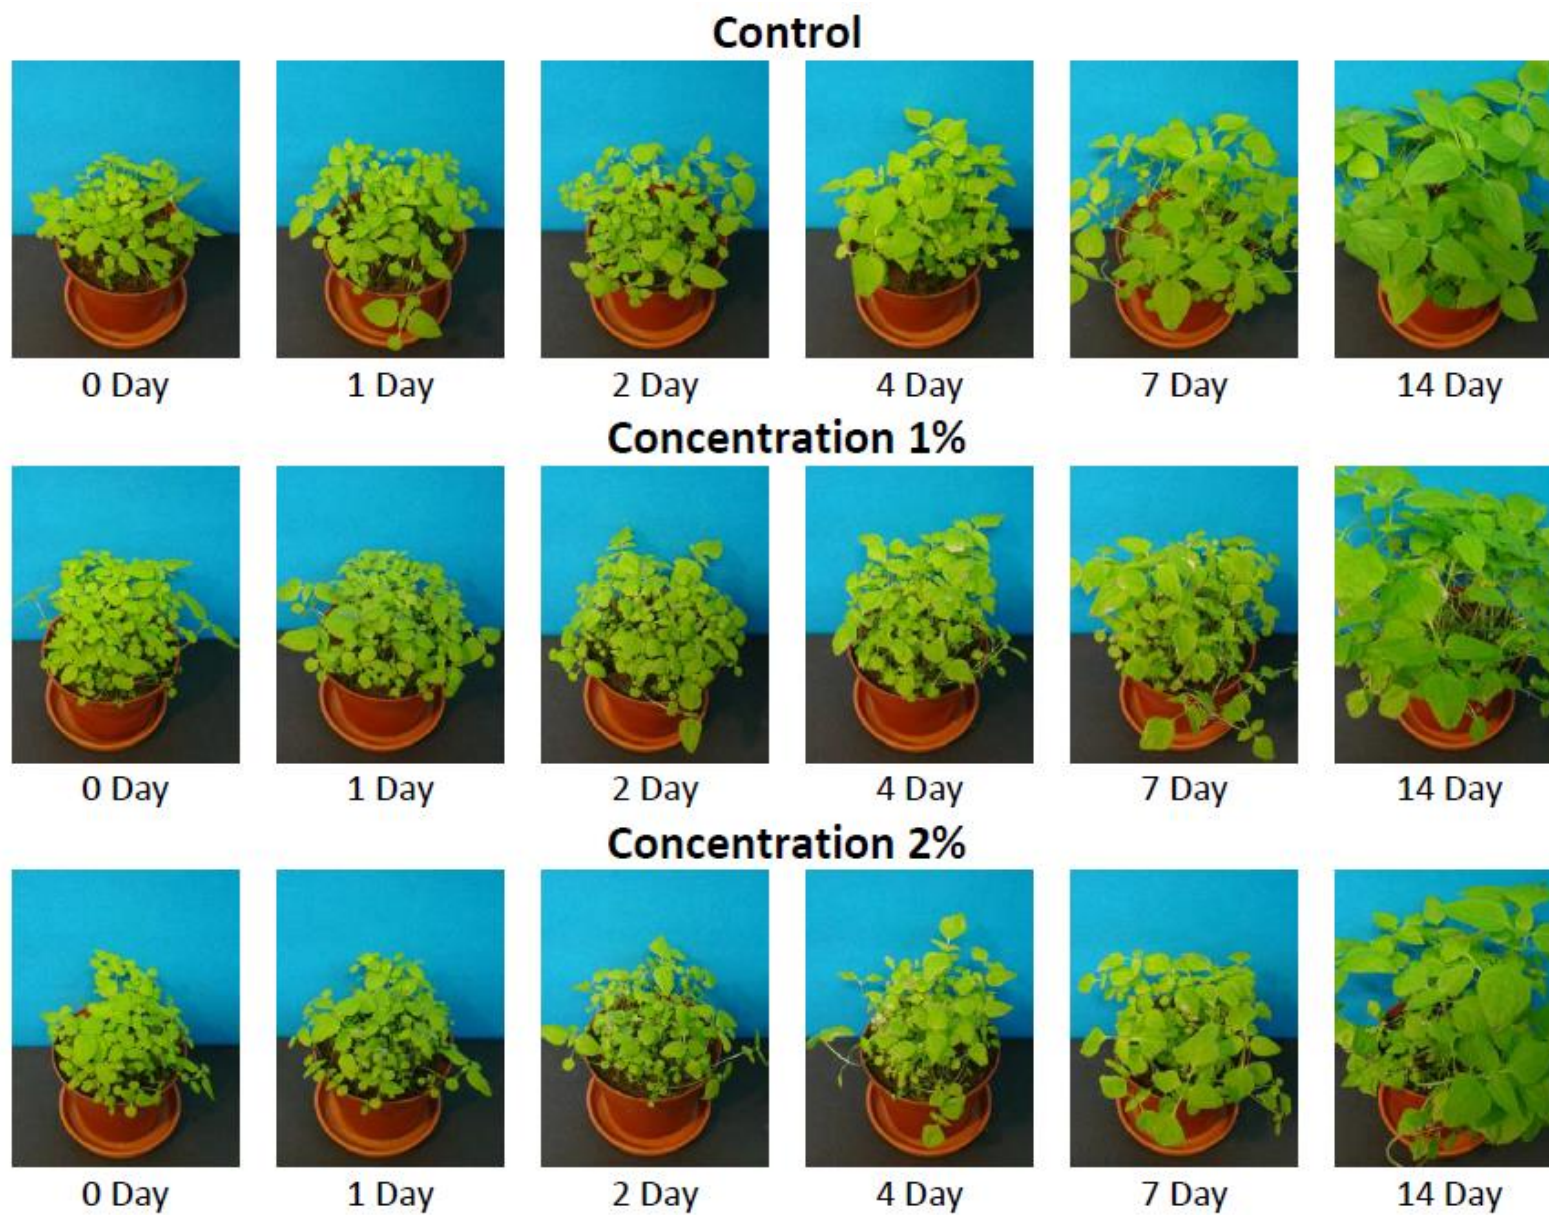

Figure S38. Digital photographs of gallant soldier after the spraying of 1% and 2% aqueous solutions of *(S)*-TCA.



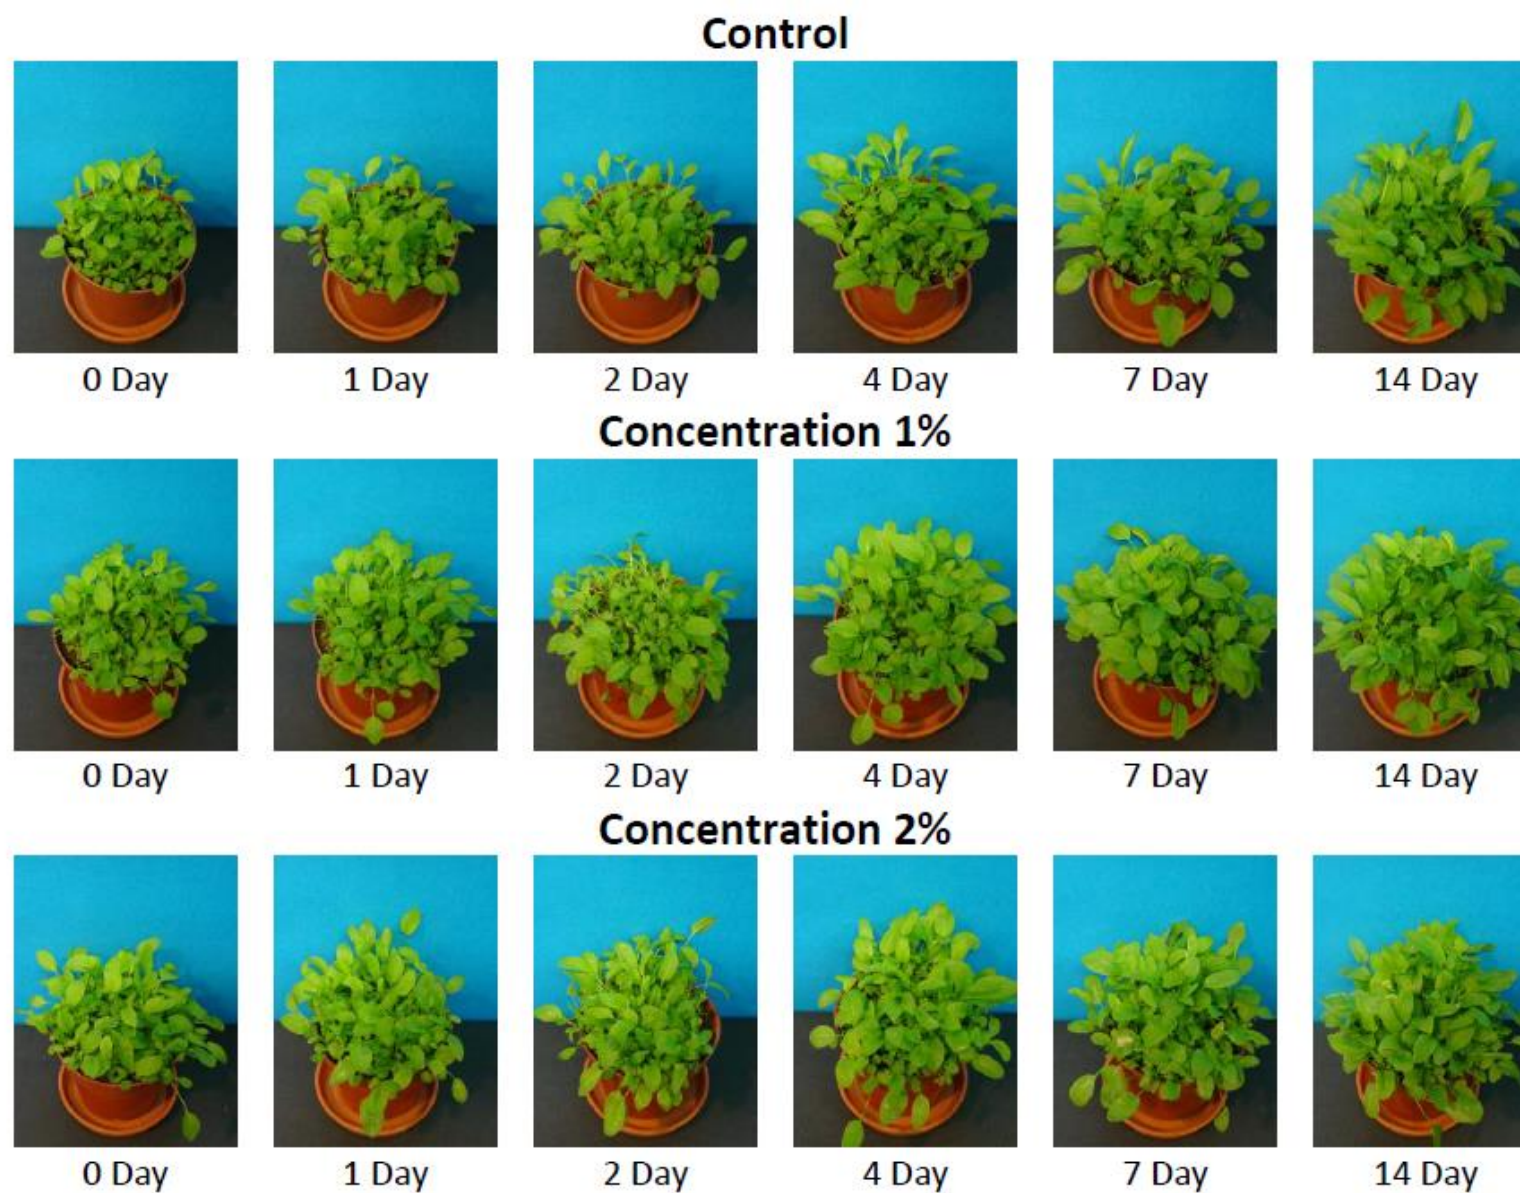

Figure S39. Digital photographs of common sorrel after the spraying of 1% and 2% aqueous solutions of (S)-TCA.

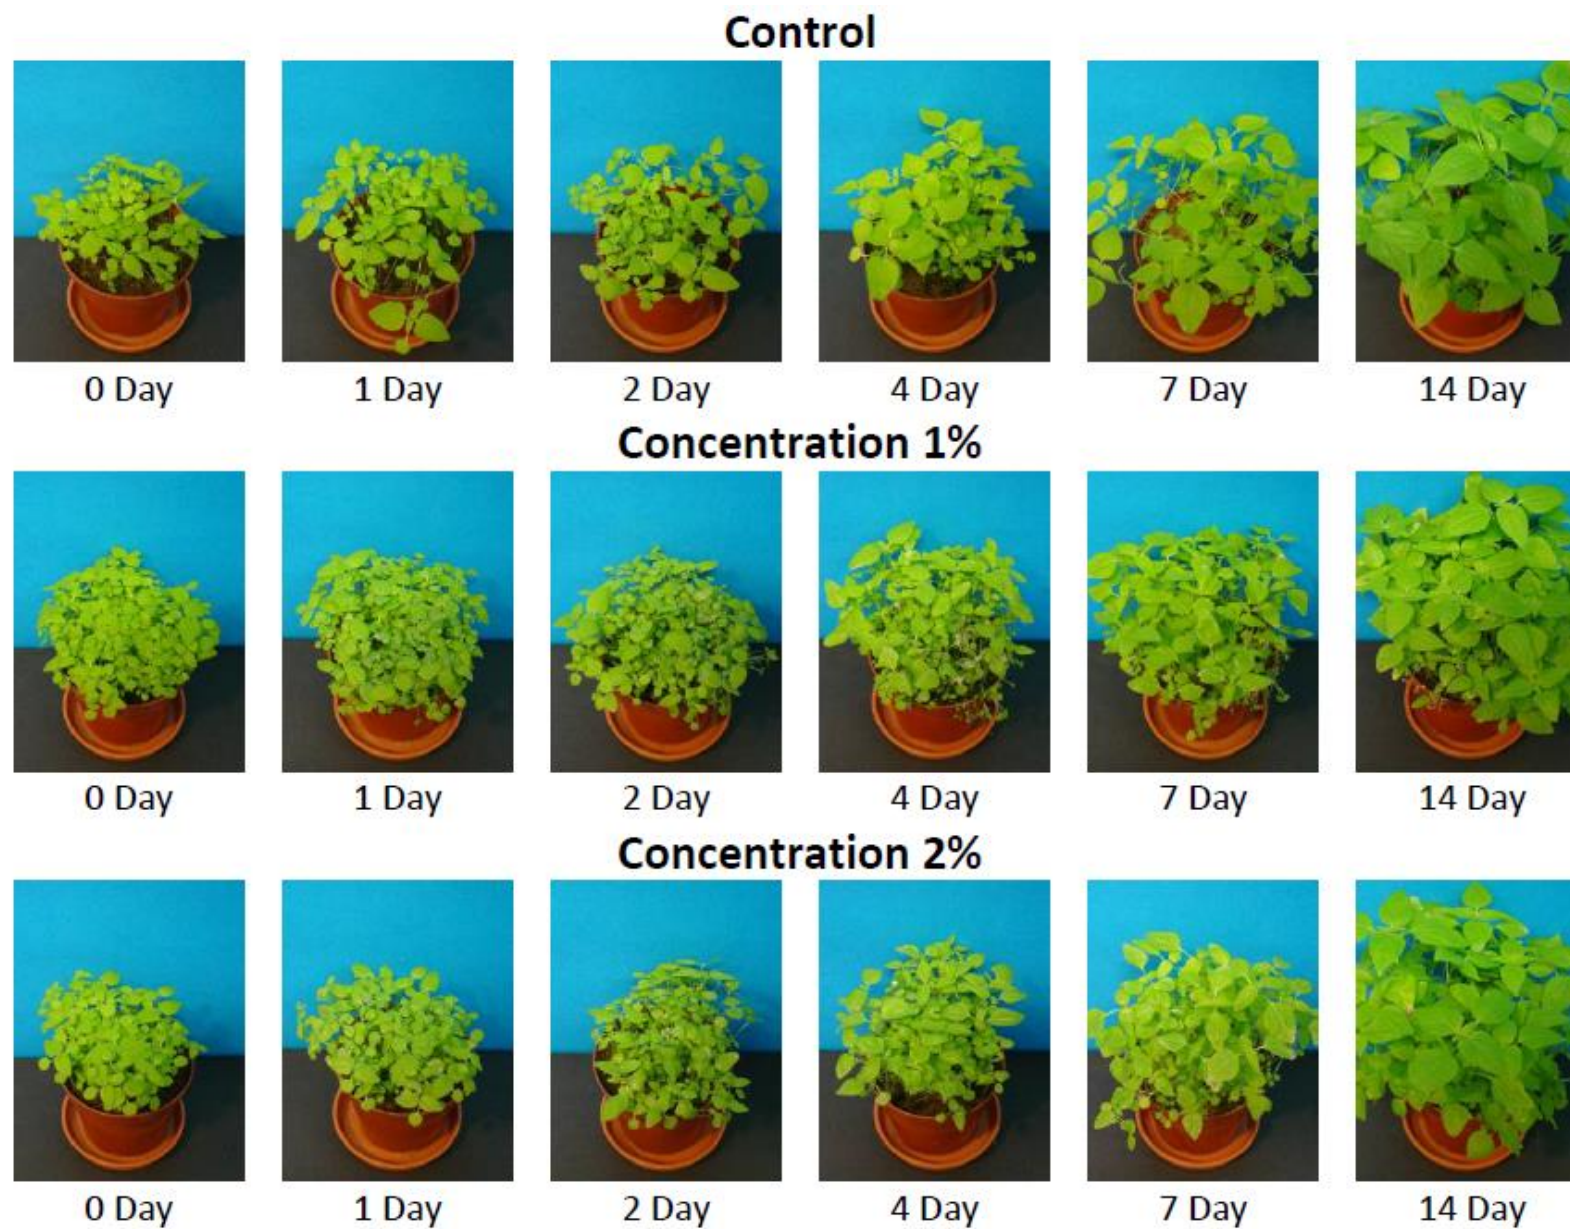

Figure S40. Digital photographs of gallant soldier after the spraying of 1% and 2% aqueous solutions of  $(R)\text{-SO}_4$ .



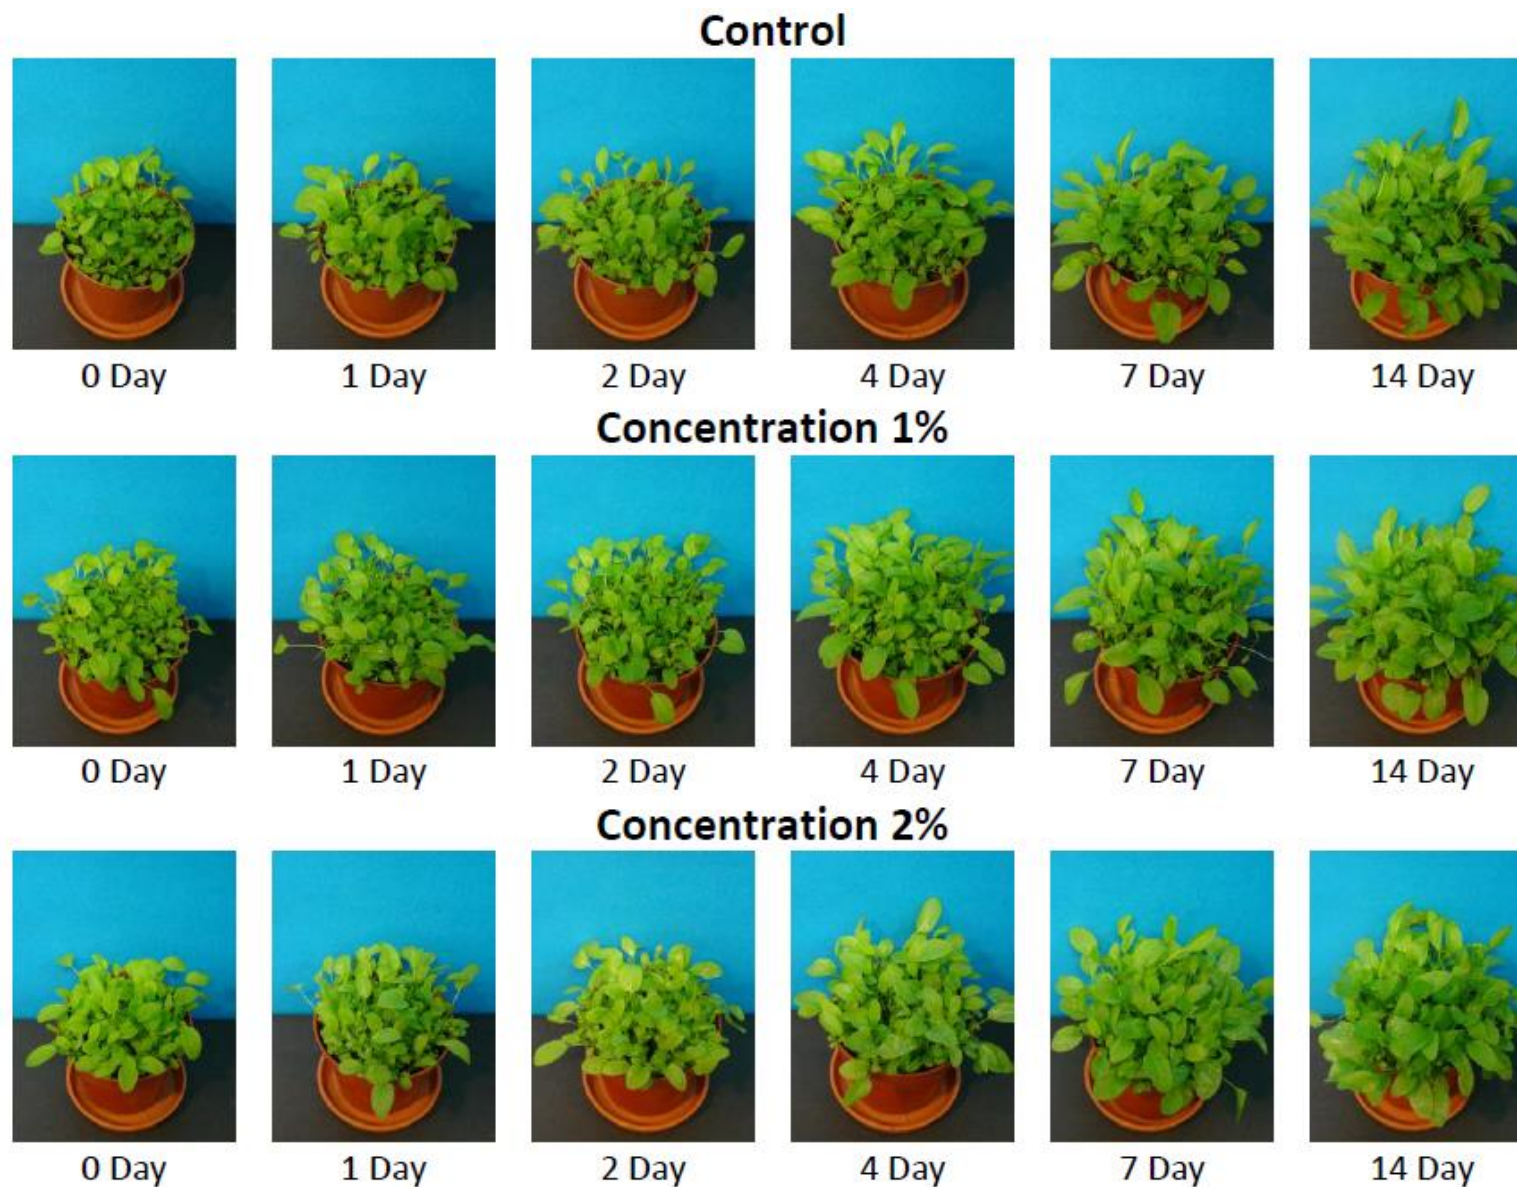

Figure S41. Digital photographs of common sorrel after the spraying of 1% and 2% aqueous solutions of  $(R)$ - $SO_4$ .



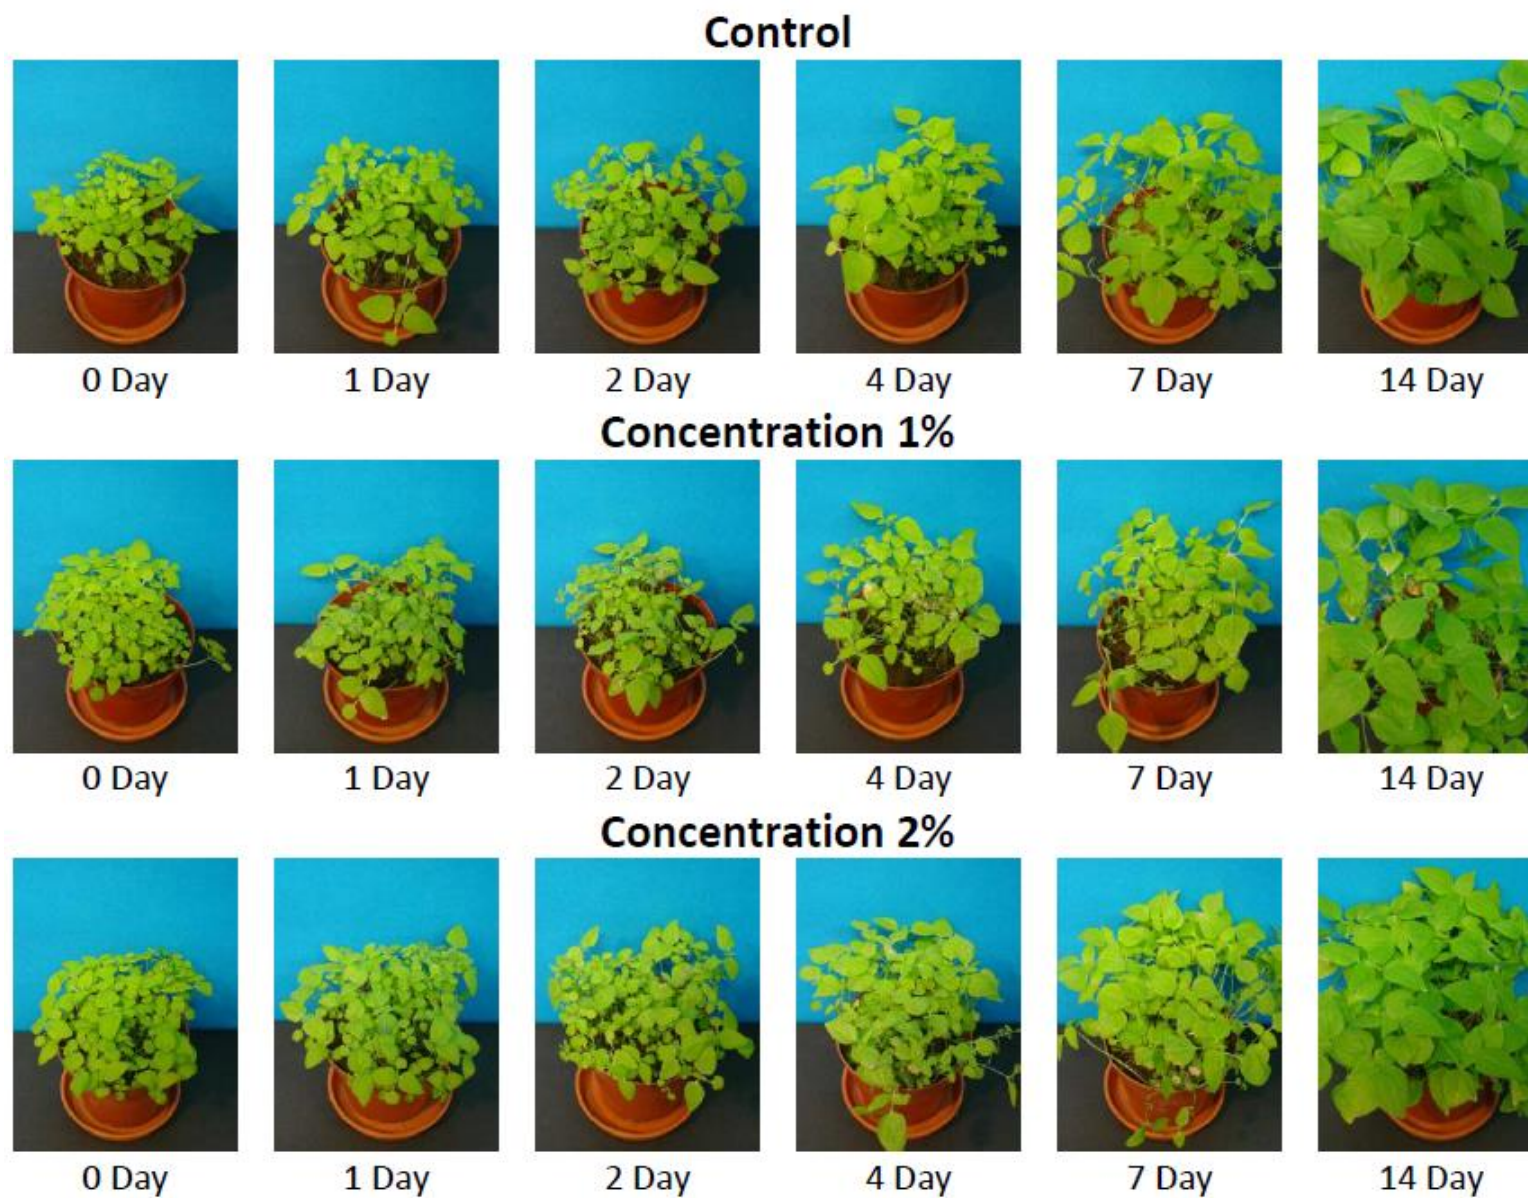

Figure S42. Digital photographs of gallant soldier after the spraying of 1% and 2% aqueous solutions of *(S)*-SO<sub>4</sub>.

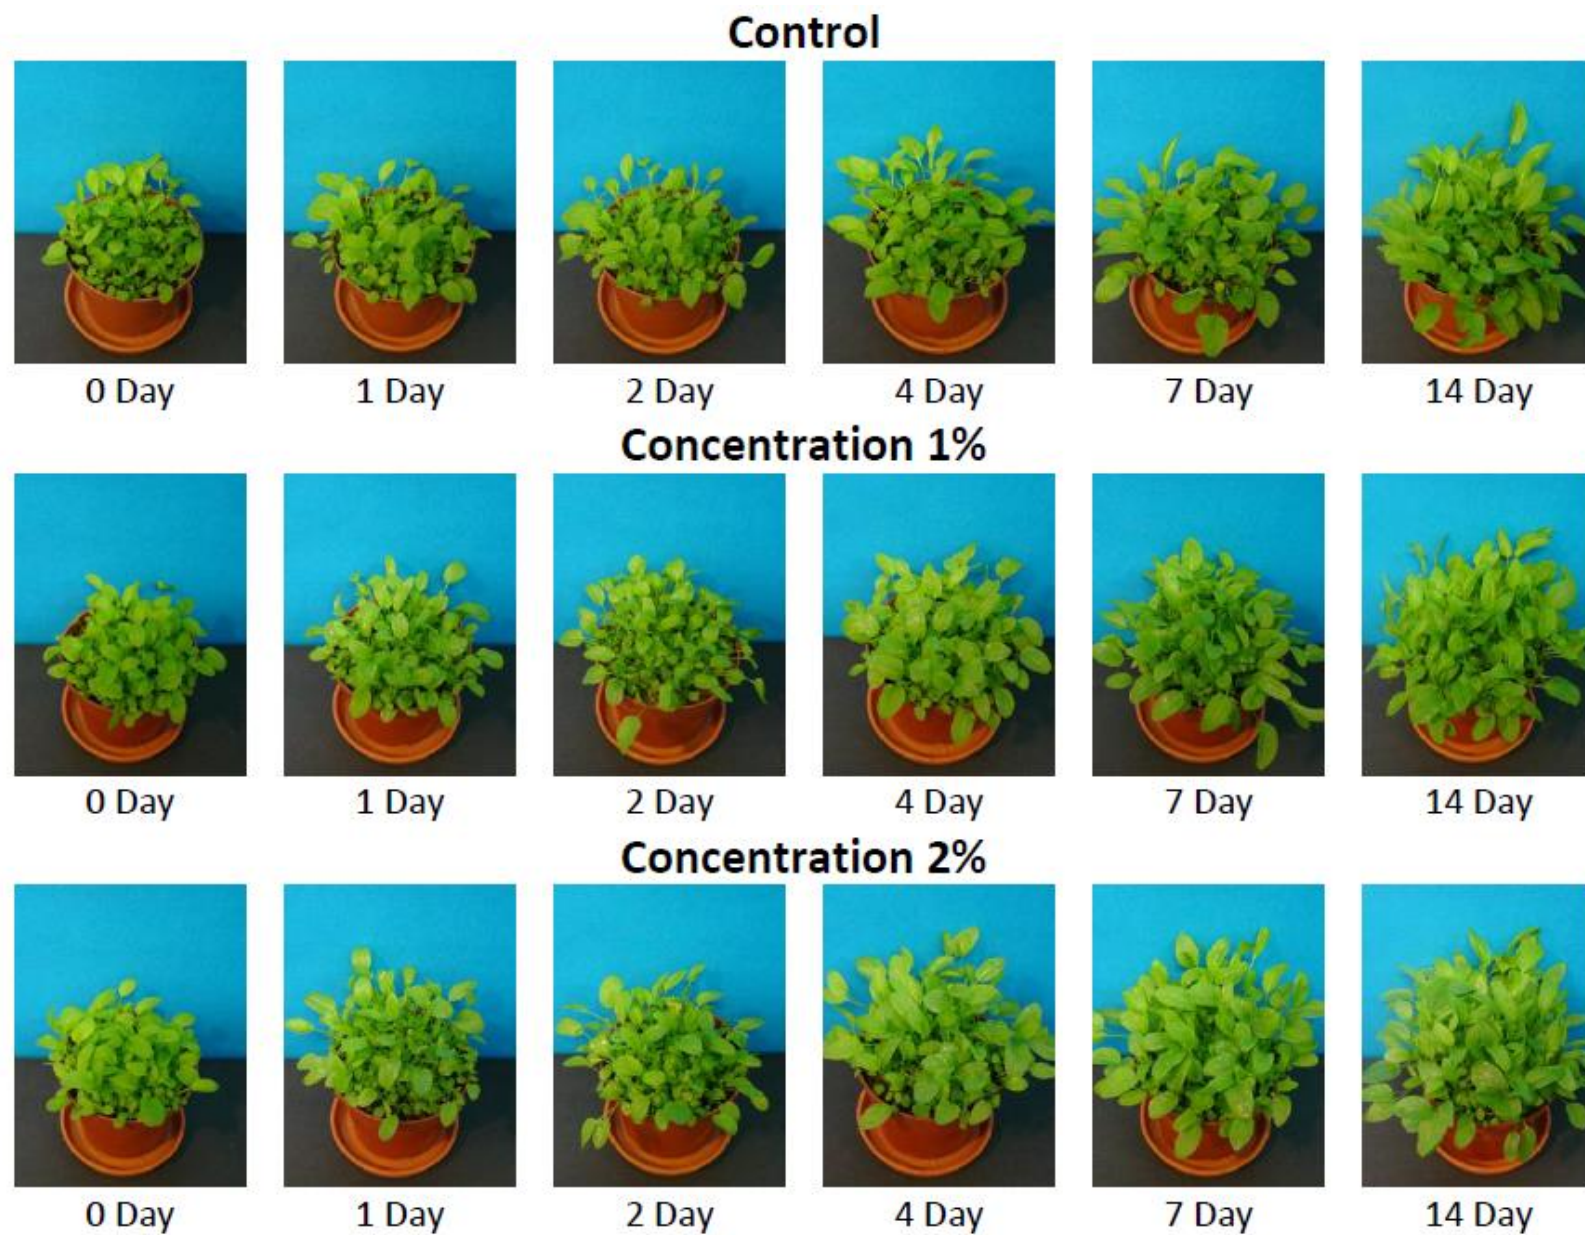

Figure S43. Digital photographs of common sorrel after the spraying of 1% and 2% aqueous solutions of  $(S)\text{-SO}_4$ .



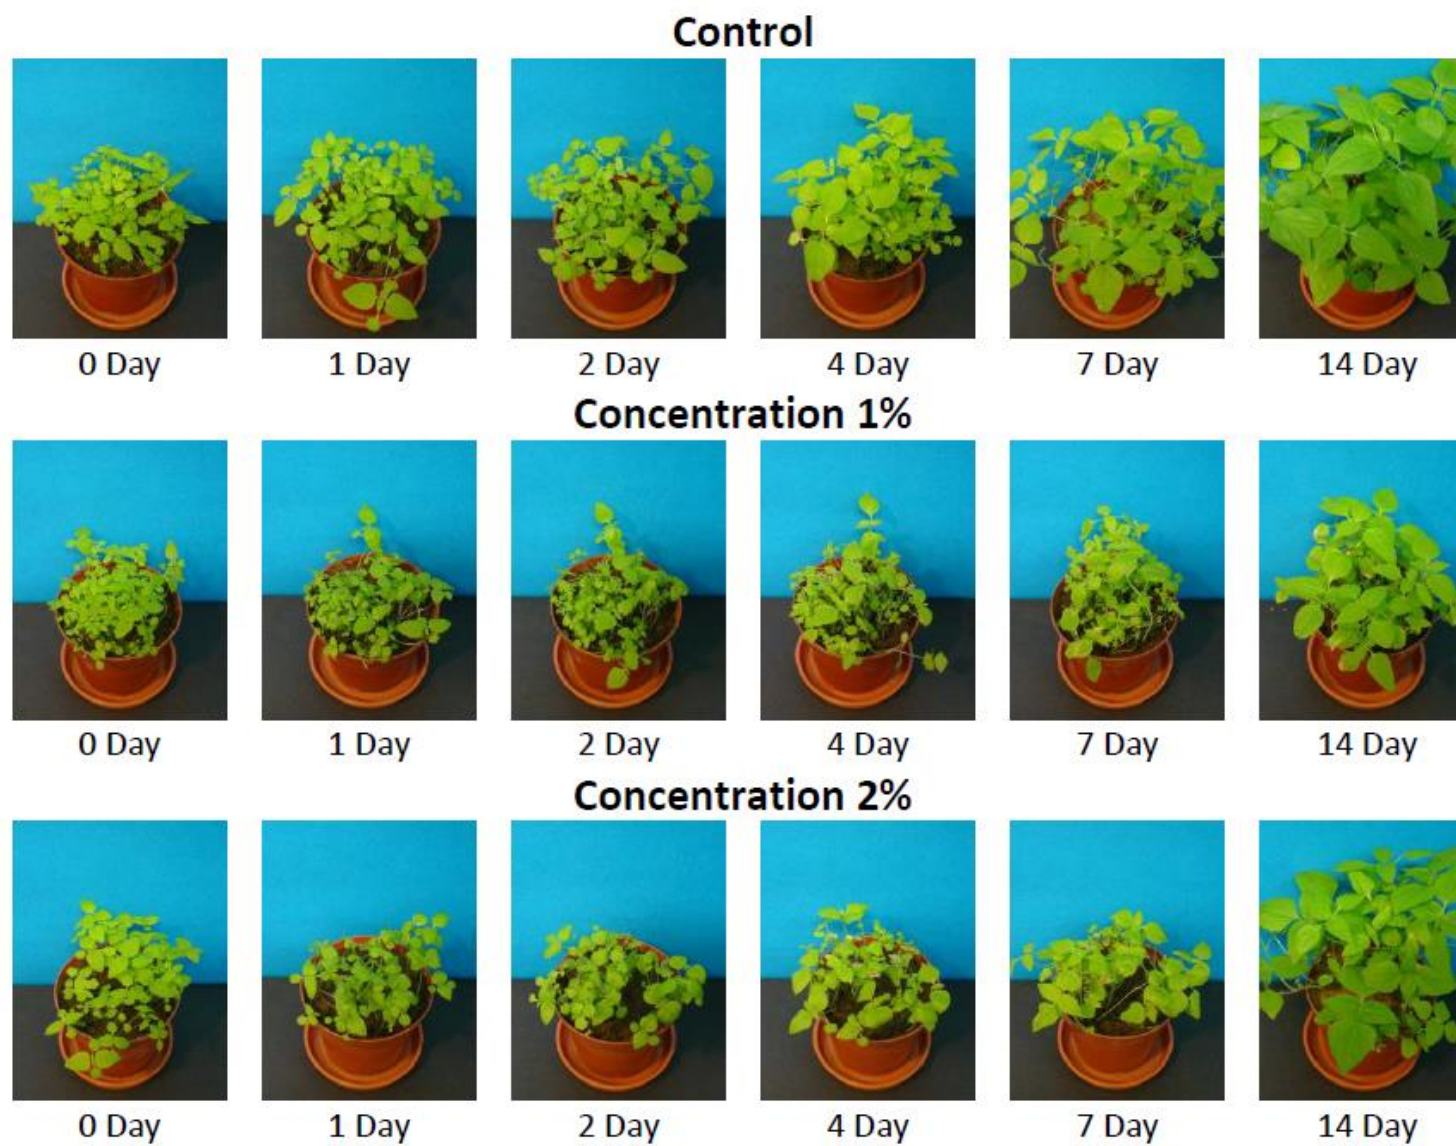

Figure S44. Digital photographs of gallant soldier after the spraying of 1% and 2% aqueous solutions of **DIPA-SO<sub>4</sub>**.

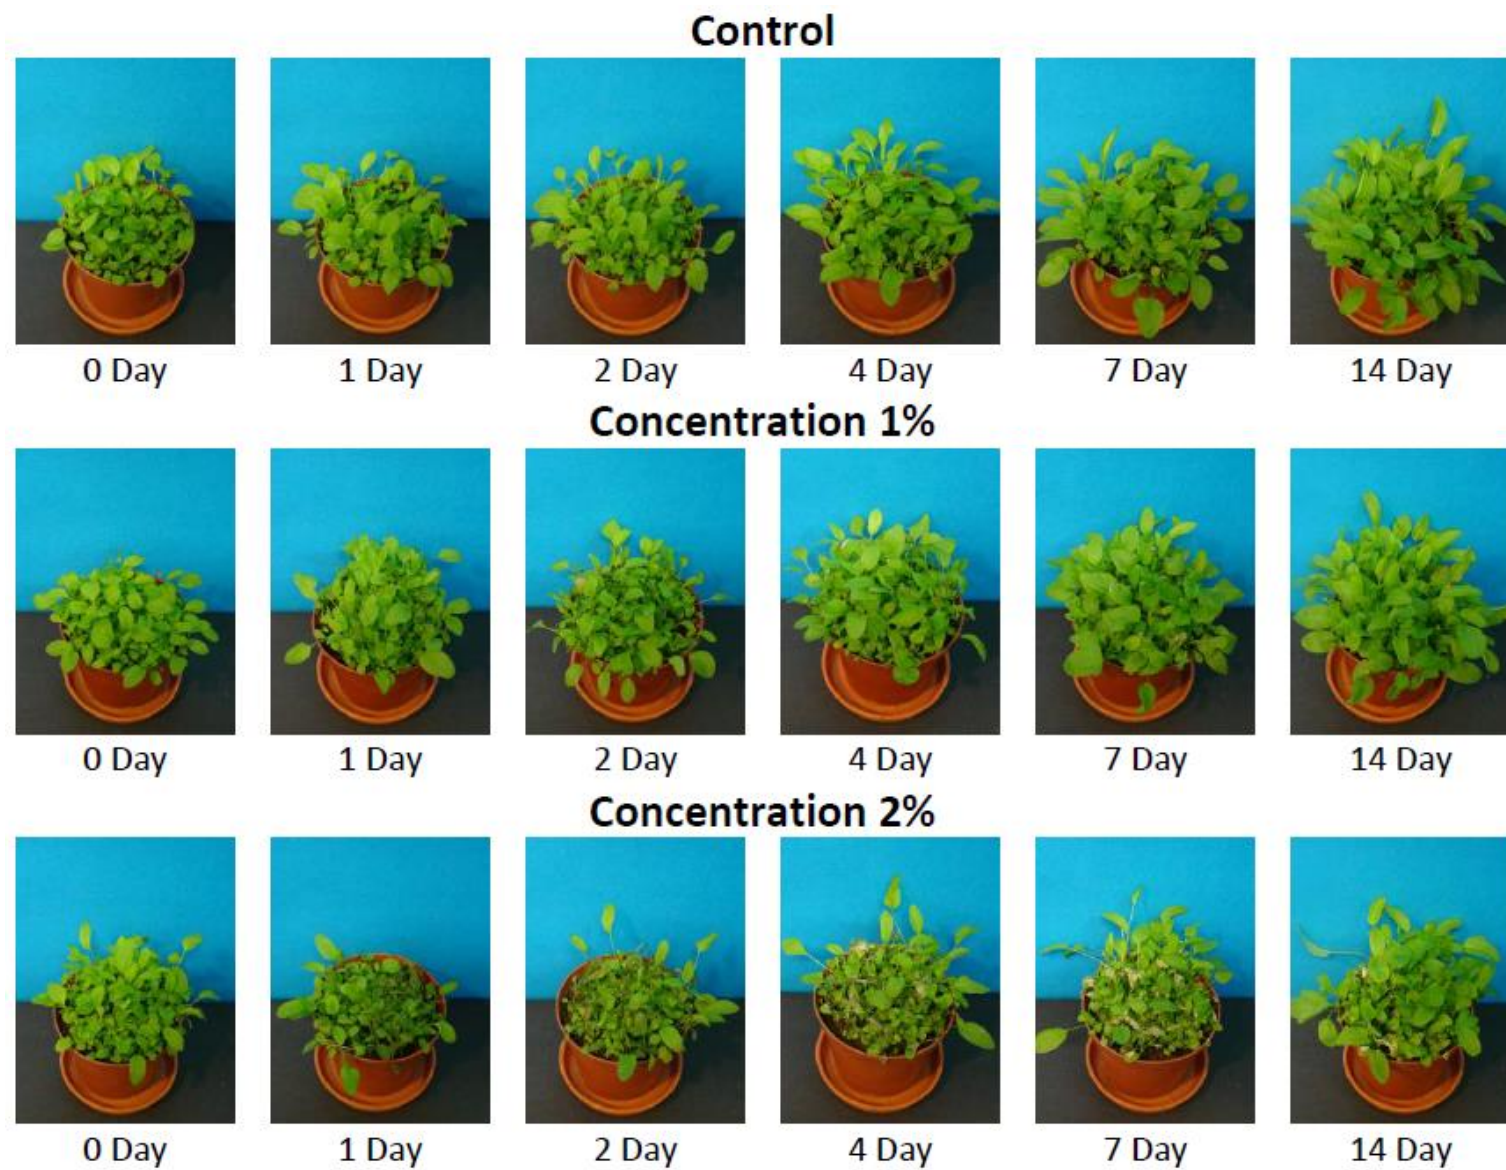

Figure S45. Digital photographs of common sorrel after the spraying of 1% and 2% aqueous solutions of *DIPA-SO<sub>4</sub>*.
